# Supplementary material
Source: PubMed Central journal article supplement (PMC11498135)
Supplement: SC-015-D4SC05256K-s001.pdf [file SC-015-D4SC05256K-s001.pdf]

## Supplementary information

# Discovery of polyketide carboxylate phytotoxin from polyketide glycoside hybrid by $\beta$ -glucosidase mediated ester bond hydrolysis

Xin Wang<sup>a</sup>, De-Kun Kong<sup>a</sup>, Hua-Ran Zhang<sup>a</sup> and Yi Zou<sup>\*a</sup>

<sup>a</sup> College of Pharmaceutical Sciences, Southwest University, Chongqing 400715, P. R. China

\* Corresponding author: E-mail: [zouyi31@swu.edu.cn](mailto:zouyi31@swu.edu.cn)

# Table of contents

|                                                                                                                                                                                          |    |
|------------------------------------------------------------------------------------------------------------------------------------------------------------------------------------------|----|
| 1. Supplementary Experimental Procedures.....                                                                                                                                            | 5  |
| 1.1 General methods.....                                                                                                                                                                 | 5  |
| 1.2 Strains and culture conditions.....                                                                                                                                                  | 5  |
| 1.3 Plasmids construction.....                                                                                                                                                           | 5  |
| 1.4 Extraction of gDNA and the synthesis of cDNA.....                                                                                                                                    | 7  |
| 1.5 Preparation and transformation of <i>F. proliferatum</i> or <i>A. nidulans</i> protoplasts.....                                                                                      | 7  |
| 1.6 Knockout of <i>pro</i> cluster in <i>F. proliferatum</i> .....                                                                                                                       | 8  |
| 1.7 Heterologous expression of <i>pro</i> cluster in <i>A. nidulans</i> .....                                                                                                            | 8  |
| 1.8 Chemical feeding of compounds <b>1</b> and <b>2</b> into <i>Fp-ΔproA-L</i> strain.....                                                                                               | 8  |
| 1.9 Compound <b>1</b> in PBS buffer under different pH values.....                                                                                                                       | 8  |
| 1.10 ECD calculations for compound <b>7</b> .....                                                                                                                                        | 8  |
| 1.11 Protein expression and purification in <i>E. coli</i> .....                                                                                                                         | 9  |
| 1.12 Preparation and characterization of <i>A. nidulans</i> microsome and crude enzymes.....                                                                                             | 9  |
| 1.13 <i>In vitro</i> characterization of ProG towards compound <b>1</b> .....                                                                                                            | 9  |
| 1.14 <i>In vitro</i> characterization of ProE towards compound <b>8</b> .....                                                                                                            | 10 |
| 1.15 Time-course assays for ProI towards compound <b>7</b> .....                                                                                                                         | 10 |
| 1.16 <i>In vitro</i> characterization of microsome fractions of ProJ and ProI.....                                                                                                       | 10 |
| 1.17 Time-course assays for crude enzymes of <i>AN-proL</i> towards compound <b>1</b> .....                                                                                              | 10 |
| 1.18 <i>In vitro</i> characterization of crude enzymes of <i>AN-proK</i> , <i>AN-proL</i> and its mutants.....                                                                           | 10 |
| 1.19 <i>In vivo</i> H <sub>2</sub> <sup>18</sup> O labeling experiments and LC–MS detection.....                                                                                         | 11 |
| 1.20 Acid hydrolysis of compounds <b>1</b> and <b>9</b> and HPLC detection.....                                                                                                          | 11 |
| 1.21 The procedure for <b>3</b> and <b>5</b> configuration determination.....                                                                                                            | 11 |
| 1.22 Purification and structural characterization of compounds.....                                                                                                                      | 12 |
| 1.23 Root growth inhibition assay of <i>Arabidopsis thaliana</i> .....                                                                                                                   | 13 |
| 1.24 Bioinformatics analysis.....                                                                                                                                                        | 13 |
| 2. Supplementary Tables.....                                                                                                                                                             | 14 |
| Table S1. Stains and plasmids used in this study.....                                                                                                                                    | 14 |
| Table S2. Primers used in this study.....                                                                                                                                                | 15 |
| Table S3. Plasmids used in this study.....                                                                                                                                               | 18 |
| Table S4. The protein sequence of <i>pro</i> gene cluster.....                                                                                                                           | 19 |
| Table S5. HR-MS data of compounds in this study.....                                                                                                                                     | 22 |
| Table S6. NMR data of compound <b>1</b> in DMSO- <i>d</i> <sub>6</sub> .....                                                                                                             | 23 |
| Table S7. NMR data of compound <b>2</b> in CDCl <sub>3</sub> .....                                                                                                                       | 24 |
| Table S8. NMR data of compound <b>3</b> in DMSO- <i>d</i> <sub>6</sub> .....                                                                                                             | 25 |
| Table S9. NMR data of compound <b>4</b> in DMSO- <i>d</i> <sub>6</sub> .....                                                                                                             | 26 |
| Table S10. NMR data of compound <b>5</b> in DMSO- <i>d</i> <sub>6</sub> .....                                                                                                            | 27 |
| Table S11. NMR data of compound <b>6</b> in DMSO- <i>d</i> <sub>6</sub> .....                                                                                                            | 28 |
| Table S12. The <sup>1</sup> H NMR spectroscopic data of compounds <b>3S</b> ( <i>R</i> -MTPA derivative) and <b>3R</b> ( <i>S</i> -MTPA derivative) in DMSO- <i>d</i> <sub>6</sub> ..... | 29 |
| Table S13. The <sup>1</sup> H NMR spectroscopic data of compounds <b>5S</b> ( <i>R</i> -MTPA derivative) and <b>5R</b> ( <i>S</i> -MTPA derivative) in DMSO- <i>d</i> <sub>6</sub> ..... | 30 |
| Table S14. NMR data of compound <b>7</b> in DMSO- <i>d</i> <sub>6</sub> .....                                                                                                            | 31 |
| Table S15. Energy (298.15 K) analysis for <b>7R</b> and <b>7S</b> .....                                                                                                                  | 32 |
| Table S16. NMR data of compound <b>8</b> in DMSO- <i>d</i> <sub>6</sub> .....                                                                                                            | 33 |
| Table S17. NMR data of compound <b>9</b> in DMSO- <i>d</i> <sub>6</sub> .....                                                                                                            | 34 |
| Table S18. NMR data of compound <b>9</b> in pyridine- <i>d</i> <sub>5</sub> .....                                                                                                        | 35 |
| 3. Supplementary Figures.....                                                                                                                                                            | 36 |
| Figure S1. Schematic diagram of plasmids used in this study.....                                                                                                                         | 36 |
| Figure S2. The well-known fungal phytotoxins produced by <i>Fusarium</i> species.....                                                                                                    | 37 |
| Figure S3. The genome-mined homologue gene clusters of PKS16 in public and our lab database.....                                                                                         | 38 |
| Figure S4. The prediction of transmembrane helices of mGT ProJ.....                                                                                                                      | 39 |
| Figure S5. The <i>pro</i> genes are all under transcription when <i>F. proliferatum</i> is incubated on glycerol medium.....                                                             | 40 |
| Figure S6. PCR verification of knockout mutants of <i>F. proliferatum</i> in this study.....                                                                                             | 41 |
| Figure S7. HPLC (refractive index detector) analysis of the glycosyl of compound <b>1</b> .....                                                                                          | 42 |
| Figure S8. LC–MS analysis of the feeding assay of <i>Fp-ΔproA-L</i> towards compound <b>2</b> .....                                                                                      | 43 |

|                                                                                                                                                                        |    |
|------------------------------------------------------------------------------------------------------------------------------------------------------------------------|----|
| Figure S9. SDS-PAGE of proteins purified from <i>E. coli</i> BL21 in this study. ....                                                                                  | 44 |
| Figure S10. LC-MS analysis of the <i>in vitro</i> biochemical assays of $\alpha$ , $\beta$ -hydrolase ProG towards compound <b>1</b> . ....                            | 45 |
| Figure S11. LC-MS analysis of the feeding assay of <i>Fp-<math>\Delta</math>proA-L</i> towards compound <b>1</b> . ....                                                | 46 |
| Figure S12. LC-MS analysis of compound <b>1</b> in PBS buffer under different pH values. ....                                                                          | 47 |
| Figure S13. Comparison of calculated ECD spectra of (7 <i>S</i> )- and (7 <i>R</i> )-isomers with the experimental spectra of <b>7</b> . ....                          | 48 |
| Figure S14. Time-course assays for FMO ProI towards compound <b>7</b> . ....                                                                                           | 49 |
| Figure S15. Bioinformatic analysis of $\beta$ -glucosidase ProL. ....                                                                                                  | 50 |
| Figure S16. Traditional catalytic mechanism of $\beta$ -glucosidase that hydrolyze glycosidic bonds. ....                                                              | 51 |
| Figure S17. HPLC (evaporative light scattering detector) analysis of the glycosyl of compound <b>9</b> . ....                                                          | 52 |
| Figure S18. LC-MS analysis of the <i>in vitro</i> biochemical assays of mGT ProJ towards compound <b>1</b> . ....                                                      | 53 |
| Figure S19. Sequence similarity network (SSN) analysis of unknown function protein ProK. ....                                                                          | 54 |
| Figure S20. The $\beta$ -glucosidase ProL with His-tag in <i>E. coli</i> BL21 is insoluble. ....                                                                       | 55 |
| Figure S21. LC-MS analysis of <i>in vitro</i> biochemical assays of crude enzymes of <i>AN-proK</i> towards compound <b>1</b> . ....                                   | 56 |
| Figure S22. LC-MS analysis of mutagenesis experiments on the conventional active sites D266 and E493 of $\beta$ -glucosidases in ProL towards compound <b>1</b> . .... | 57 |
| Figure S23. UV absorption and HRMS spectrum (positive ionization) analysis of compound <b>1</b> . ....                                                                 | 58 |
| Figure S24. UV absorption and HRMS spectrum (positive ionization) analysis of compound <b>2</b> . ....                                                                 | 58 |
| Figure S25. UV absorption and HRMS spectrum (positive ionization) analysis of compound <b>3</b> . ....                                                                 | 59 |
| Figure S26. UV absorption and HRMS spectrum (positive ionization) analysis of compound <b>4</b> . ....                                                                 | 59 |
| Figure S27. UV absorption and HRMS spectrum (positive ionization) analysis of compound <b>5</b> . ....                                                                 | 60 |
| Figure S28. UV absorption and HRMS spectrum (positive ionization) analysis of compound <b>6</b> . ....                                                                 | 60 |
| Figure S29. UV absorption and HRMS spectrum (negative ionization) analysis of compound <b>7</b> . ....                                                                 | 61 |
| Figure S30. UV absorption and HRMS spectrum (positive ionization) analysis of compound <b>8</b> . ....                                                                 | 61 |
| Figure S31. UV absorption and HRMS spectrum (negative ionization) analysis of compound <b>9</b> . ....                                                                 | 62 |
| Figure S32. UV absorption and HRMS spectrum (negative ionization) analysis of compound <b>3S</b> . ....                                                                | 62 |
| Figure S33. UV absorption and HRMS spectrum (negative ionization) analysis of compound <b>3R</b> . ....                                                                | 63 |
| Figure S34. UV absorption and HRMS spectrum (negative ionization) analysis of compound <b>5S</b> . ....                                                                | 63 |
| Figure S35. UV absorption and HRMS spectrum (negative ionization) analysis of compound <b>5R</b> . ....                                                                | 64 |
| Figure S36. <sup>1</sup> H NMR spectrum of compound <b>1</b> in DMSO- <i>d</i> <sub>6</sub> (400 MHz). ....                                                            | 65 |
| Figure S37. <sup>13</sup> C NMR spectrum of compound <b>1</b> in DMSO- <i>d</i> <sub>6</sub> (100 MHz). ....                                                           | 66 |
| Figure S38. DEPT-135° spectrum of compound <b>1</b> in DMSO- <i>d</i> <sub>6</sub> . ....                                                                              | 67 |
| Figure S39. HSQC spectrum of compound <b>1</b> in DMSO- <i>d</i> <sub>6</sub> . ....                                                                                   | 68 |
| Figure S40. HMBC spectrum of compound <b>1</b> in DMSO- <i>d</i> <sub>6</sub> . ....                                                                                   | 69 |
| Figure S41. <sup>1</sup> H- <sup>1</sup> H COSY spectrum of compound <b>1</b> in DMSO- <i>d</i> <sub>6</sub> . ....                                                    | 70 |
| Figure S42. <sup>1</sup> H- <sup>1</sup> H NOESY spectrum of compound <b>1</b> in DMSO- <i>d</i> <sub>6</sub> . ....                                                   | 71 |
| Figure S43. <sup>1</sup> H NMR spectrum of compound <b>2</b> in CDCl <sub>3</sub> (400 MHz). ....                                                                      | 72 |
| Figure S44. <sup>13</sup> C NMR spectrum of compound <b>2</b> in CDCl <sub>3</sub> (100 MHz). ....                                                                     | 73 |
| Figure S45. DEPT-135° spectrum of compound <b>2</b> in CDCl <sub>3</sub> . ....                                                                                        | 74 |
| Figure S46. HSQC spectrum of compound <b>2</b> in CDCl <sub>3</sub> . ....                                                                                             | 75 |
| Figure S47. HMBC spectrum of compound <b>2</b> in CDCl <sub>3</sub> . ....                                                                                             | 76 |
| Figure S48. <sup>1</sup> H- <sup>1</sup> H COSY spectrum of compound <b>2</b> in CDCl <sub>3</sub> . ....                                                              | 77 |
| Figure S49. <sup>1</sup> H- <sup>1</sup> H NOESY spectrum of compound <b>2</b> in CDCl <sub>3</sub> . ....                                                             | 78 |
| Figure S50. <sup>1</sup> H NMR spectrum of compound <b>3</b> in DMSO- <i>d</i> <sub>6</sub> (400 MHz). ....                                                            | 79 |
| Figure S51. <sup>13</sup> C NMR spectrum of compound <b>3</b> in DMSO- <i>d</i> <sub>6</sub> (100 MHz). ....                                                           | 80 |
| Figure S52. DEPT-135° spectrum of compound <b>3</b> in DMSO- <i>d</i> <sub>6</sub> . ....                                                                              | 81 |
| Figure S53. HSQC spectrum of compound <b>3</b> in DMSO- <i>d</i> <sub>6</sub> . ....                                                                                   | 82 |
| Figure S54. HMBC spectrum of compound <b>3</b> in DMSO- <i>d</i> <sub>6</sub> . ....                                                                                   | 83 |
| Figure S55. <sup>1</sup> H- <sup>1</sup> H COSY spectrum of compound <b>3</b> in DMSO- <i>d</i> <sub>6</sub> . ....                                                    | 84 |
| Figure S56. <sup>1</sup> H- <sup>1</sup> H NOESY spectrum of compound <b>3</b> in DMSO- <i>d</i> <sub>6</sub> . ....                                                   | 85 |
| Figure S57. <sup>1</sup> H NMR spectrum of compound <b>4</b> in DMSO- <i>d</i> <sub>6</sub> (400 MHz). ....                                                            | 86 |
| Figure S58. <sup>13</sup> C NMR spectrum of compound <b>4</b> in DMSO- <i>d</i> <sub>6</sub> (100 MHz). ....                                                           | 87 |
| Figure S59. DEPT-135° spectrum of compound <b>4</b> in DMSO- <i>d</i> <sub>6</sub> . ....                                                                              | 88 |
| Figure S60. HSQC spectrum of compound <b>4</b> in DMSO- <i>d</i> <sub>6</sub> . ....                                                                                   | 89 |
| Figure S61. HMBC spectrum of compound <b>4</b> in DMSO- <i>d</i> <sub>6</sub> . ....                                                                                   | 90 |
| Figure S62. <sup>1</sup> H- <sup>1</sup> H COSY spectrum of compound <b>4</b> in DMSO- <i>d</i> <sub>6</sub> . ....                                                    | 91 |
| Figure S63. <sup>1</sup> H- <sup>1</sup> H NOESY spectrum of compound <b>4</b> in DMSO- <i>d</i> <sub>6</sub> . ....                                                   | 92 |
| Figure S64. <sup>1</sup> H NMR spectrum of compound <b>5</b> in DMSO- <i>d</i> <sub>6</sub> (400 MHz). ....                                                            | 93 |

|                                                                                                                          |     |
|--------------------------------------------------------------------------------------------------------------------------|-----|
| Figure S65. <sup>13</sup> C NMR spectrum of compound <b>5</b> in DMSO- <i>d</i> <sub>6</sub> (100 MHz).....              | 94  |
| Figure S66. DEPT-135° spectrum of compound <b>5</b> in DMSO- <i>d</i> <sub>6</sub> .....                                 | 95  |
| Figure S67. HSQC spectrum of compound <b>5</b> in DMSO- <i>d</i> <sub>6</sub> .....                                      | 96  |
| Figure S68. HMBC spectrum of compound <b>5</b> in DMSO- <i>d</i> <sub>6</sub> .....                                      | 97  |
| Figure S69. <sup>1</sup> H- <sup>1</sup> H COSY spectrum of compound <b>5</b> in DMSO- <i>d</i> <sub>6</sub> .....       | 98  |
| Figure S70. <sup>1</sup> H- <sup>1</sup> H NOESY spectrum of compound <b>5</b> in DMSO- <i>d</i> <sub>6</sub> .....      | 99  |
| Figure S71. <sup>1</sup> H NMR spectrum of compound <b>6</b> in DMSO- <i>d</i> <sub>6</sub> (400 MHz).....               | 100 |
| Figure S72. <sup>13</sup> C NMR spectrum of compound <b>6</b> in DMSO- <i>d</i> <sub>6</sub> (100 MHz).....              | 101 |
| Figure S73. DEPT-135° spectrum of compound <b>6</b> in DMSO- <i>d</i> <sub>6</sub> .....                                 | 102 |
| Figure S74. HSQC spectrum of compound <b>6</b> in DMSO- <i>d</i> <sub>6</sub> .....                                      | 103 |
| Figure S75. HMBC spectrum of compound <b>6</b> in DMSO- <i>d</i> <sub>6</sub> .....                                      | 104 |
| Figure S76. <sup>1</sup> H- <sup>1</sup> H COSY spectrum of compound <b>6</b> in DMSO- <i>d</i> <sub>6</sub> .....       | 105 |
| Figure S77. <sup>1</sup> H- <sup>1</sup> H NOESY spectrum of compound <b>6</b> in DMSO- <i>d</i> <sub>6</sub> .....      | 106 |
| Figure S78. <sup>1</sup> H NMR spectrum of compound <b>3S</b> in DMSO- <i>d</i> <sub>6</sub> (400 MHz).....              | 107 |
| Figure S79. <sup>1</sup> H NMR spectrum of compound <b>3R</b> in DMSO- <i>d</i> <sub>6</sub> (400 MHz).....              | 108 |
| Figure S80. <sup>1</sup> H NMR spectrum of compound <b>5S</b> in DMSO- <i>d</i> <sub>6</sub> (400 MHz).....              | 109 |
| Figure S81. <sup>1</sup> H NMR spectrum of compound <b>5R</b> in DMSO- <i>d</i> <sub>6</sub> (400 MHz).....              | 110 |
| Figure S82. <sup>1</sup> H NMR spectrum of compound <b>7</b> in DMSO- <i>d</i> <sub>6</sub> (400 MHz).....               | 111 |
| Figure S83. <sup>13</sup> C NMR spectrum of compound <b>7</b> in DMSO- <i>d</i> <sub>6</sub> (100 MHz).....              | 112 |
| Figure S84. DEPT-135° spectrum of compound <b>7</b> in DMSO- <i>d</i> <sub>6</sub> .....                                 | 113 |
| Figure S85. HSQC spectrum of compound <b>7</b> in DMSO- <i>d</i> <sub>6</sub> .....                                      | 114 |
| Figure S86. HMBC spectrum of compound <b>7</b> in DMSO- <i>d</i> <sub>6</sub> .....                                      | 115 |
| Figure S87. <sup>1</sup> H- <sup>1</sup> H COSY spectrum of compound <b>7</b> in DMSO- <i>d</i> <sub>6</sub> .....       | 116 |
| Figure S88. <sup>1</sup> H- <sup>1</sup> H NOESY spectrum of compound <b>7</b> in DMSO- <i>d</i> <sub>6</sub> .....      | 117 |
| Figure S89. <sup>1</sup> H NMR spectrum of compound <b>8</b> in DMSO- <i>d</i> <sub>6</sub> (400 MHz).....               | 118 |
| Figure S90. <sup>13</sup> C NMR spectrum of compound <b>8</b> in DMSO- <i>d</i> <sub>6</sub> (100 MHz).....              | 119 |
| Figure S91. DEPT-135° spectrum of compound <b>8</b> in DMSO- <i>d</i> <sub>6</sub> .....                                 | 120 |
| Figure S92. HSQC spectrum of compound <b>8</b> in DMSO- <i>d</i> <sub>6</sub> .....                                      | 121 |
| Figure S93. HMBC spectrum of compound <b>8</b> in DMSO- <i>d</i> <sub>6</sub> .....                                      | 122 |
| Figure S94. <sup>1</sup> H- <sup>1</sup> H COSY spectrum of compound <b>8</b> in DMSO- <i>d</i> <sub>6</sub> .....       | 123 |
| Figure S95. <sup>1</sup> H- <sup>1</sup> H NOESY spectrum of compound <b>8</b> in DMSO- <i>d</i> <sub>6</sub> .....      | 124 |
| Figure S96. <sup>1</sup> H NMR spectrum of compound <b>9</b> in DMSO- <i>d</i> <sub>6</sub> (400 MHz).....               | 125 |
| Figure S97. <sup>13</sup> C NMR spectrum of compound <b>9</b> in DMSO- <i>d</i> <sub>6</sub> (100 MHz).....              | 126 |
| Figure S98. DEPT-135° spectrum of compound <b>9</b> in DMSO- <i>d</i> <sub>6</sub> .....                                 | 127 |
| Figure S99. HSQC spectrum of compound <b>9</b> in DMSO- <i>d</i> <sub>6</sub> .....                                      | 128 |
| Figure S100. HMBC spectrum of compound <b>9</b> in DMSO- <i>d</i> <sub>6</sub> .....                                     | 129 |
| Figure S101. <sup>1</sup> H- <sup>1</sup> H COSY spectrum of compound <b>9</b> in DMSO- <i>d</i> <sub>6</sub> .....      | 130 |
| Figure S102. <sup>1</sup> H- <sup>1</sup> H NOESY spectrum of compound <b>9</b> in DMSO- <i>d</i> <sub>6</sub> .....     | 131 |
| Figure S103. <sup>1</sup> H NMR spectrum of compound <b>9</b> in pyridine- <i>d</i> <sub>5</sub> (400 MHz).....          | 132 |
| Figure S104. <sup>13</sup> C NMR spectrum of compound <b>9</b> in pyridine- <i>d</i> <sub>5</sub> (100 MHz).....         | 133 |
| Figure S105. DEPT-135° spectrum of compound <b>9</b> in pyridine- <i>d</i> <sub>5</sub> .....                            | 134 |
| Figure S106. HSQC spectrum of compound <b>9</b> in pyridine- <i>d</i> <sub>5</sub> .....                                 | 135 |
| Figure S107. HMBC spectrum of compound <b>9</b> in pyridine- <i>d</i> <sub>5</sub> .....                                 | 136 |
| Figure S108. <sup>1</sup> H- <sup>1</sup> H COSY spectrum of compound <b>9</b> in pyridine- <i>d</i> <sub>5</sub> .....  | 137 |
| Figure S109. <sup>1</sup> H- <sup>1</sup> H NOESY spectrum of compound <b>9</b> in pyridine- <i>d</i> <sub>5</sub> ..... | 138 |
| 4. Sequence information of <i>pro</i> gene cluster.....                                                                  | 139 |
| 5. Supplementary references.....                                                                                         | 148 |

# 1. Supplementary Experimental Procedures

## 1.1 General methods

Reagents were purchased from Sigma-Aldrich, Thermo Fisher Scientific, or New England BioLabs. Sangon Biotech Co., Ltd. (Shanghai, China) carried out the synthesis of primers and DNA sequencing. LC–MS analysis were performed on Waters ACQUITY H-Class UPLC–MS system coupled to a PDA detector and a SQD2 mass spectrometer (MS) detector with an ESI source. Chromatographic separation was executed at 35 °C utilizing a C18 column (ACQUITY UPLC® BEH, 1.7 µm, 2.1 mm × 100 mm, Waters). LC–MS metabolite profiles were generated on a Waters UPLC–MS system with the method outlined below: Chromatographic separation was achieved with a linear gradient of 5–99% MeCN–H<sub>2</sub>O (both containing 0.02% *v/v* formic acid) in 10 minutes followed by 99% MeCN for 3 minutes and then 5% MeCN–H<sub>2</sub>O for 3 minutes, at a flow rate of 0.4 mL/min. The MS data were collected in the *m/z* range 50–1500 in positive modes, simultaneously. MPLC was performed on BUCHI Reveleris® X2 Flash Chromatography System, with UV detectors and a BUCHI Reveleris® C18 column (40 µm, 80 g). Semi-preparative HPLC was performed on Shimadzu Prominence HPLC system using a YMC-Pack ODS-A column (5 µm, 10 × 250 mm). MCI Column chromatography (CC) was performed using MCI gel CHP 20P/P120 (37–75 µm, Mitsubishi Chemical Corporation, Japan). NMR spectra were recorded on Bruker AVANCE III NMR (400 MHz) with a 5 mm broadband probe and TMS as an internal standard. HRMS data were generated using Fourier-transform ion cyclotron resonance-mass spectrometry (FT-ICR-MS) (Bruker SolarisII, Bremen, Germany) or quadrupole time-of-flight (QTOF) mass spectrometer (Bruker IMPACT II, Bremen, Germany). ECD spectra were recorded on a JASCO J-810 spectrometer.

## 1.2 Strains and culture conditions

*Fusarium proliferatum* CGMCC 3.4710 was used as the host for knockout of the *pro* gene cluster and the isolation of compounds **1–6** and **9**. The extraction of the genome DNA (gDNA) and complementary DNA (cDNA) was performed by culturing *F. proliferatum* on solid glycerol medium (20 mL/L glycerol, 2 g/L tryptone, 2 g/L yeast extract, 20 g/L agar) at 25 °C for 4 days. For sporulation, *F. proliferatum* was maintained in a 4% mung bean water medium at 25 °C for 2 days. *Aspergillus nidulans* LO8030 was employed as the host for the heterologous expression of the *pro* gene cluster, ProJ microsome and ProL crude enzymes. *A. nidulans* was cultured at 37 °C for 3 days on solid CD medium (10 g/L glucose, 50 mL/L 20 × nitrate salts, 1 mL/L trace elements, 20 g/L agar) for sporulation or at 25 °C, 3.5 days on solid CD-ST medium (20 g/L starch, 10 g/L casein hydrolysate (acid), 50 mL/L 20 × nitrate salts, 1 mL/L trace elements, 20 g/L agar) for heterologous expression and compounds production. *Escherichia coli* BL21 was used for the protein expression of ProG, ProE, ProI and ProL. While *E. coli* XL-1 was employed for cloning. All *E. coli* strains were cultured at 37 °C for cloning or 16 °C for protein expression.

## 1.3 Plasmids construction

The plasmids and primers utilized in this study are summarized in Tables S2–3, respectively. The amplified DNA fragments from gDNA of *F. proliferatum* by specific primers and polymerase were cloned into vectors utilizing the yeast homologous recombination in *S. cerevisiae* BJ5464-NpgA to generate heterologous expression and knockout plasmids. In order to express protein in *E. coli*, intron-free genes

were amplified from the cDNA of *F. proliferatum* and then digested with specific restriction enzymes. Subsequently, the digested fragments were ligated to the digested vector pQ8, which is a protein expression vector with an MBP tag on the *N*-terminus. The resulting plasmids were confirmed by DNA sequencing and then used for expression or knockout purposes. The schematic diagram of plasmids used in this study are shown in Figure S1.

To generate knockout strains of *proA-L*, *A*, *C*, *D*, *E*, *I*, *K* and *L* in *Fusarium proliferatum* CGMCC 3.4710, plasmids pIM 2501–2507 were gained through yeast homologous recombination in *S. cerevisiae* BJ5464-NpgA. These plasmids contain the *hygB* resistance gene, which was amplified from gDNA of *hygB* resistance knockout strain by PCR using primer pairs pYEU-*hyg*-F/pYEU-*hyg*-R. The upstream and downstream (~2,000 bp) of *proA* were obtained from the gDNA of *F. proliferatum* CGMCC 3.4710 by PCR using primer pairs pYEU-KO*proA*-UP-F/pYEU-KO*proA*-UP-R and pYEU-KO*proA*-DN-F/pYEU-KO*proA*-DN-R and cloned to *Spe* I-*Pml* I digested vector pYEU with *hygB* resistance gene to get plasmid pIM 2501. Plasmids pIM 2502–2507 were gained by the same method.

To construct the expression plasmids of *proF*, *G*, *E*, *I*, *J*, *K* and *L* genes for *A. nidulans*, each gene with its terminator was amplified from the gDNA of *F. proliferatum* CGMCC 3.4710 by PCR. The *glaA*, *gpdA*, *amyB* promoters were amplified from vectors pANU, pANR, pANP by using primer pairs *glaA*-F/*glaA*-R, *gpdA*-F/*gpdA*-R and *amyB*-F/*amyB*-R, respectively. Plasmid pANU was digested with *Not* I and plasmids pANR, pANP were digested with *Bam*H I to use as vectors for insert genes. The specific construction methods of plasmids pIM 2508–2516 are as follows: The gene *proF* was amplified by PCR using primer pairs pANU-*proF*-F1/pANU-*proF*-R1, pANU-*proF*-F2/pANU-*proF*-R2, pANU-*proF*-F3/pANU-*proF*-R3, and was cloned into vector pANU with *glaA* promoter yielding plasmid pIM 2508. The genes *proF* and *proG* were amplified by PCR using primer pairs pANU-*proF*-F1/pANU-*proF*-R1, pANU-*proF*-F2/pANU-*proF*-R2, pANU-*proF*-F3/pANU-*proFG*-R3, pANU-*proG*-F/pANU-*proG*-R, and were cloned into vector pANU yielding plasmid pIM 2509, the promoters *glaA* and *gpdA* were used for *proF* and *proG* respectively. The genes *proG*, *proI* and *proJ* were amplified by PCR using primer pairs pANU-*proG*-F/pANR-*proG*-R, pANR-*proI*-F/ANR-*proIJ*-R, and were cloned into vector pANR yielding plasmid pIM 2510, the promoters *gpdA*, *glaA*, and *amyB* (amplified by PCR using primer pairs pANR-*amyB*-*proJ*-F/*amyB*-R) were used for *proG*, *proI* and *proJ* respectively. The genes *proE*, *proI* and *proJ* were amplified by PCR utilizing the following primer pairs: pANR-*proE*-F/pANR-*proE*-R, pANR-*proI*-F/pANR-*proIJ*-R and were cloned into vector pANR resulting in the construction of the plasmid pIM 2511, the promoters *gpdA*, *glaA*, and *amyB* (amplified by PCR using primer pairs pANR-*amyB*-*proJ*-F/*amyB*-R) were used for *proE*, *proI* and *proJ* respectively. The gene *proJ* was amplified by PCR using primer pairs pANR-*proJ*-F/pANR-*proJ*-R, and was cloned into vector pANR with *gpdA* promoter yielding plasmid pIM 2512. The gene *proK* was amplified by PCR using primer pairs pANP-*proK*-F/pANP-*proK*-R, and was cloned into vector pANP with *amyB* promoter resulting in the plasmid pIM 2513. The gene *proL* underwent a similar PCR amplification process using the primer pairs pANP-*proL*-F/pANP-*proL*-R, and was cloned into vector pANP with *amyB* promoter yielding plasmid pIM 2514. The gene variants *proL*(D266A) and *proL*(E493A) were amplified by

PCR using primer pairs pANP-*proL*-F/pANP-*proL*-D266A-R, pANP-*proL*-D266A-F/pANP-*proL*-R and pANP-*proL*-F/pANP-*proL*-E493A-R, pANP-*proL*-E493A-F/pANP-*proL*-R respectively, and were cloned into vector pANP with *amyB* promoter yielding plasmids pIM 2515 and pIM 2516.

To express *proG*, *E*, *I* and *L* in *E. coli* BL21, intron-free *proG* was amplified from the cDNA of *F. proliferatum* CGMCC 3.4710 using the primer pairs pGEX 4t-1-ProG-F/pGEX 4t-1-ProG-R. The fragments were digested with *EcoR* I/Not I and then was ligated into the correspondingly digested vector pGEX 4T-1 (protein expression vector with GST tag on *N*-terminus) yielding plasmid pIM 2517. Intron-free *proE* and *proI* were amplified from the cDNA of *F. proliferatum* CGMCC 3.4710 using the primer pairs pQ8-ProE-F/pQ8-ProE-R for ProE, pQ8-ProI-F/pQ8-ProI-R for ProI. The PCR products were subsequently subjected to enzymatic digestion with the restriction enzymes *EcoR* I/*Hind* III for ProE and *EcoR* I/Not I for ProI, and then were ligated into the correspondingly digested pQ8 (protein expression vector with MBP tag on *N*-terminus) yielding plasmids pIM 2518 and pIM 2519. Intron-free *proL* was amplified from the cDNA of *F. proliferatum* CGMCC 3.4710 using pColdI-ProL-F/pColdI-ProL-R and the PCR products were digested with *Nde* I/*Xho* I, and subsequently inserted into the correspondingly digested pColdI (protein expression vector with His tag on *N*-terminus) resulting in the plasmid pIM 2520.

#### 1.4 Extraction of gDNA and the synthesis of cDNA

The strain *Fusarium proliferatum* CGMCC 3.4710 was cultured on solid glycerol medium (20 mL/L glycerol, 2 g/L tryptone, 2 g/L yeast extract, 20 g/L agar) at 25 °C for a duration of 4 days. Post incubation, the mycelium was harvested for the subsequent extraction of genomic DNA (gDNA) and the synthesis of complementary DNA (cDNA). CTAB (20 g/L CTAB, 81.8 g/L NaCl, 186.1 g/L Na<sub>2</sub>EDTA·2H<sub>2</sub>O, 0.1 M Tris-HCl pH 8.0) method was used for the extraction of gDNA. RNA was prepared with TRIZOL® Reagent (Ambion), strictly adhering to the protocols provided by the manufacturer. To ensure the purity of the RNA and to eliminate any potential gDNA contamination, an RNAase-free DNase I treatment from New England Biolabs (NEB) was applied. Following this, the reverse transcription of RNA into cDNA was performed using the MonScript™ RTIII All-in-One Mix with dsDNase, facilitating a comprehensive removal of any residual gDNA and enabling the synthesis of high-quality cDNA.

#### 1.5 Preparation and transformation of *F. proliferatum* or *A. nidulans* protoplasts

To obtain protoplasts, spores of *F. proliferatum* were germinated in 50 mL of PDB medium (26 g/L potato dextrose) at 25 °C, 220 rpm for 11 hours, while *A. nidulans* spores were inoculated in 40 mL of liquid CD medium and cultured at 37 °C, 220 rpm for 9 hours. Following spore germination, the precipitation was washed twice with 15 mL of Osmotic buffer (1.2 M MgSO<sub>4</sub>·7H<sub>2</sub>O, 10 mM sodium phosphate, pH 5.8) and centrifuged at 4 °C, 3,750 rpm for 8 minutes to remove the supernatant. The precipitate was resuspended in 10 mL of Osmotic buffer containing 30 mg of *Lysing Enzymes* (Sigma) and 20 mg *Yatalase* (Takara), and then cultured at 28 °C, 80 rpm for 20 hours (*F. proliferatum*) or 12 hours (*A. nidulans*). The culture fluid was gently overlaid with 10 mL of Trapping buffer (0.6 M sorbitol, 0.1 M Tris-HCl, pH 7.0), then centrifuged at 4 °C, 4,000 rpm for 20 minutes. The protoplasm layer was transferred and fully dispersed into two volumes of STC buffer (1.2 M sorbitol, 10 mM CaCl<sub>2</sub>, 10 mM

Tris-HCl, pH 7.5), and centrifuged at 4 °C, 3,750 rpm for 8 minutes. The supernatant was removed and STC buffer was added to resuspend the protoplasts for transformation.

### 1.6 Knockout of *pro* cluster in *F. proliferatum*

The knockout mutants were generated through double crossover homologous recombination, utilizing a hygromycin resistance split-marker for targeted gene knockout. The gene knockout cassettes containing the *hygB* resistance gene were amplified from the knockout plasmid, and then transformed into *F. proliferatum* protoplasts mediated via PEG solution (60% PEG4000, 50 mM CaCl<sub>2</sub>, 10 mM Tris-HCl, pH 7.5). The transformed protoplasts were plated on solid SD-PDA medium (PDB medium with 1.2 mM sorbitol and 2g/L agar) containing 50 µg/mL hygromycin B at 25 °C for 3–4 days, and the resulting gDNA of transformants was verified by PCR. The knockout mutants were cultured on solid glycerol medium at 25 °C for 4 days. The fermentation mixture was extracted with a mixture of ethyl acetate and acetone (v:v=3:1) and dissolved in methanol for further LC–MS analysis.

### 1.7 Heterologous expression of *pro* cluster in *A. nidulans*

To gain stains of heterologous expression in *A. nidulans*, the expression plasmids were added to protoplasts of *A. nidulans* and the mixture was cultured on the regeneration dropout solid medium (CD medium with 1.2 mM sorbitol and appropriate supplements, CD-SD medium) at 37 °C. After 2–3 days, the transformants were respectively transferred to solid CD and cultivated at 37 °C for 3–4 days for sporulation. The spores were then inoculated on solid CD-ST medium and culture at 25 °C for 3 days, followed by analysis using LC–MS.

### 1.8 Chemical feeding of compounds 1 and 2 into *Fp-ΔproA-L* strain

The *Fp-ΔproA-L* strain was inoculated into 1 mL of glycerol medium at 25 °C for 4 days. Subsequently, the culture was supplemented with 100 µM of either compound 1 or compound 2. Following a 12-hour incubation post-addition, the mycelia and medium were extracted with equal volume of ethyl acetate/acetone (v:v=3:1). The organic phase was then evaporated to dryness and was re-dissolved in methanol for further LC–MS analysis. As a control, the *Fp-wild type* and the *Fp-ΔproA-L* strain untreated with compounds 1 or 2 were processed under the same conditions.

### 1.9 Compound 1 in PBS buffer under different pH values

The compound 1 (100 µM) was introduced into 50 µL PBS buffer (140 mM NaCl, 2.7 mM KCl, 10 mM Na<sub>2</sub>HPO<sub>4</sub>, 1.8 mM KH<sub>2</sub>PO<sub>4</sub>) under different pH values (3, 7, 8, 9, 10, 11, 12, 13). The reactions were conducted at a controlled temperature of 25 °C for a duration of 20 minutes. Then reaction mixtures were extracted with twice the volume of ethyl acetate, and then evaporated to dryness and re-dissolved in 50 µL of methanol for the further LC–MS analysis.

### 1.10 ECD calculations for compound 7

The absolute configuration of 7 was determined by quantum chemical calculations of their theoretical ECD spectra. Both *R*- and *S*- enantiomers were chosen for theoretical studies. Initially, conformational analyses were conducted employing the Molecular Merck force field (MMFF) calculations using



Spartan'14 program (Wavefunction Inc., Irvine, CA). The resulting conformers for **7** were then refined through geometry optimization and frequency calculations by Density functional theory (DFT) at the B3LYP/6-31G(d) level using the Gaussian16W C.01 program package (Gaussian Inc., Wallingford, CT). Subsequently, the optimized conformers were applied for theoretical ECD calculation. The TD-DFT calculations were performed at the M062X/TZVP level in solution (MeOH) state. The final ECD spectra were generated using the SpecDis 1.71 program (Berlin, Germany), where the simulated spectra were averaged according to the Boltzmann distribution theory and their respective Gibbs free energy (Table S15). A comparative analysis was conducted between the theoretical ECD curves of compound **7** and the experimental data.

### 1.11 Protein expression and purification in *E. coli*

The protein expression plasmids were individually transformed into *E. coli* BL21 strain by heat shock transformation. The strains were cultured in 1L of liquid LB medium (25 g/L LB broth) with 50 µg/mL kanamycin or 100 µg/mL ampicillin at 37 °C, 220 rpm until reaching an OD<sub>600</sub> of 0.4–0.6. Subsequently, the cultures were induced with 0.2 mM isopropylthio-β-D-galactoside (IPTG) at 16 °C, 220 rpm for 20 hours. The cells were collected by centrifugation at 4 °C, 4,000 rpm for 15 minutes. To purify soluble ProG with *N*-GST-tag, the cells were resuspended in PBS buffer (140 mM NaCl, 2.7 mM KCl, 10 mM Na<sub>2</sub>HPO<sub>4</sub>, 1.8 mM KH<sub>2</sub>PO<sub>4</sub>, pH 7.3) and lysed by sonication on ice. Then, the supernatant was obtained by centrifugation at 4°C, 14,000 rpm for 40 min, and incubated with Glutathione Sepharose 4B resin (GE Healthcare). The resin was washed with PBS buffer three times to remove miscellaneous protein, the GST-tag protein was eluted by GST elution buffer (50 mM Tris-HCl, 10 mM reduced glutathione, pH 8.0). To purify soluble ProE or ProI with *N*-MBP-tag, the cells were resuspended in binding buffer (20 mM Tris-HCl, 200 mM NaCl, 1 mM EDTA, pH 7.4). Subsequently, the cells were lysed through sonication on ice and centrifuged at 4 °C, 14,000 rpm for 40 minutes to obtain soluble fraction. The protein was purified by Dextrin Sepharose resin, and the protein-bound resin was washed with MBP elution buffer (10 mM maltose in binding buffer). The pooled fraction was concentrated and exchanged into buffer C (50 mM Tris-HCl, 50 mM NaCl, 5% glycerol, pH 7.5). The purified enzyme was analyzed by SDS-PAGE and the concentration was measured with BCA protein quantification kit (Beijing Dingguo Changsheng Biotechnology Co., Ltd).

### 1.12 Preparation and characterization of *A. nidulans* microsome and crude enzymes

The *A. nidulans* mutants were inoculated in 100 mL CD-ST medium and cultured at 25 °C, 220 rpm for 2.5 days. The culture broth was filtered out and the cells were collected. The cells were lysed by grinding, and cellular debris was resuspended in buffer C for the preparation of crude enzymes. The microsome fractions were then harvested by centrifugation at 4 °C, 14,000 rpm for 30 minutes and resuspended in buffer C. Substrates and cofactors were added to the microsome or crude enzymes to accomplish reaction at 25 °C. The reaction mixtures were extracted with twice the volume of ethyl acetate and the extracted ethyl acetate layer was evaporated to dryness. The residues were re-dissolved in methanol for the subsequent LC–MS analysis.

### 1.13 *In vitro* characterization of ProG towards compound **1**

For α, β-hydrolase ProG *in vitro* assay, the reaction was carried out in 50 µL PBS (pH7.3), containing 5 µM ProG (with GST tag), and 100 µM of the substrate (compound **1**). The *in vitro* assays were incubation at 25 °C for 5 hours, and the reactions were stopped by the addition of twice the volume of

ethyl acetate. The extracted ethyl acetate layer was then evaporated to dryness and re-dissolved in 50  $\mu$ L of methanol. Subsequently, the products were analyzed by LC–MS. The control assays were performed without ProG.

#### **1.14 *In vitro* characterization of ProE towards compound 8**

For the *in vitro* assay of B-V monooxygenase ProE, the reaction was conducted in 50  $\mu$ L buffer C (pH7.5), containing 5  $\mu$ M of ProE (with MBP tag), 200  $\mu$ M FAD, 2 mM NADPH and 100  $\mu$ M of the compound **8**. The *in vitro* assays were incubation at 25  $^{\circ}$ C for 5 hours then stopped by the addition of twice the volume of ethyl acetate. The extracted ethyl acetate layer was then evaporated to dryness and re-dissolved in 50  $\mu$ L of methanol. Subsequently, the products were analyzed by LC–MS. The control assays were performed without ProE.

#### **1.15 Time-course assays for ProI towards compound 7**

The *in vitro* assays of FMO ProI were conducted in 50  $\mu$ L buffer C (pH7.5), containing 5  $\mu$ M of ProI, 200  $\mu$ M FAD, 1 mM NADPH and 100  $\mu$ M of the compound **7** at 25  $^{\circ}$ C. After 1 minute, 20 minutes, 40 minutes, 80 minutes and 5 hours, the reactions were stopped by the addition of twice the volume of ethyl acetate. The extracted ethyl acetate layer was then evaporated to dryness and re-dissolved in 50  $\mu$ L of methanol for the further LC–MS analysis. The control assays were performed without ProI.

#### **1.16 *In vitro* characterization of microsome fractions of ProJ and ProI**

For mGT ProJ and FMO ProI *in vitro* assay: microsome fractions of ProJ, 10  $\mu$ M ProI, 100  $\mu$ M compound **7**, 1 mM uridine diphosphate glucose (UDPG), 200  $\mu$ M FAD and 2 mM NADPH were conducted in 100  $\mu$ L buffer C at 25  $^{\circ}$ C for 5 hours. After the incubation, twice the volume of ethyl acetate was added, the ethyl acetate layer was evaporated to dryness and redissolved in 50  $\mu$ L of methanol for further LC–MS analysis. The control assays were performed without ProJ and ProI.

#### **1.17 Time-course assays for crude enzymes of *AN-proL* towards compound 1**

The *in vitro* assays of the *AN-proL* crude enzymes were conducted in 50  $\mu$ L buffer C (pH7.5), containing crude enzymes of ProL and 100  $\mu$ M of the compound **1** at 25  $^{\circ}$ C. After 30 s, 2 minutes, 5 minutes and 10 minutes, the enzymatic reactions were quenched by the addition of equal volume of methanol. The supernatant was obtained by centrifugation at 13,300 rpm for 5 min for the further LC–MS analysis. As a control, the *AN-wild type* crude enzymes treated with compound **1** was processed under the same conditions.

#### **1.18 *In vitro* characterization of crude enzymes of *AN-proK*, *AN-proL* and its mutants**

The *in vitro* assays of *AN-proK*, *AN-proL*, *AN-proL*-D266A or *AN-proL*-E493A crude enzymes were systematically executed in 50  $\mu$ L buffer C (pH7.5) at 25  $^{\circ}$ C. Each reaction mixture was composed of the respective crude enzymes and 100  $\mu$ M of the compound **1**. After a duration of 10 minutes, the enzymatic reactions were halted by introducing equal volume of methanol. The supernatant was obtained by centrifugation at 13,300 rpm for 5 min for the further LC–MS analysis. As a control, the *AN-wild type* or *AN-proL* crude enzymes treated with compound **1** was processed under the same conditions.

### 1.19 *In vivo* H<sub>2</sub><sup>18</sup>O labeling experiments and LC–MS detection

For isotope incorporation experiments with H<sub>2</sub><sup>18</sup>O, the *F. proliferatum* was cultivated on solid glycerol medium containing 90% H<sub>2</sub><sup>18</sup>O at 25 °C for 4 days. The fermentation mixture was then extracted with a mixture of ethyl acetate and acetone (v:v=3:1) and reconstituted in methanol for further LC–MS analysis. The LC–MS analysis were performed on Agilent Technologies 1260 Infinity II–6125 system in conjunction with a C18 column (Poroshell 120 EC-C18, 1.9 μm, 2.1 mm × 50 mm, Agilent). LC–MS metabolite profiles were generated utilizing the following method: Chromatographic separation was achieved with a linear gradient of 10–100% MeCN–H<sub>2</sub>O (the water components of the mobile phase contained 0.1% v/v formic acid) over 3 minutes, followed by 100% MeCN for 30 s, then returning to 10% MeCN–H<sub>2</sub>O for 30 s, all at a flow rate of 0.3 mL/min. The MS data were collected in the *m/z* range 100–1000 in positive ion modes simultaneously.

### 1.20 Acid hydrolysis of compounds **1** and **9** and HPLC detection

To analyze the saccharide polyol configuration of compounds **1** and **9**, 5 mg of each compound was added to a solution of 4 M trifluoroacetic acid (TFA) in MeOH. The mixture for compound **1** was agitated at a temperature of 110 °C for a duration of 1 hour, whereas the mixture for compound **9** was subjected to the same conditions for a shorter period of 20 minutes to control the further hydrolysis of the disaccharide units. The resulting mixture was then dried by vacuum to obtain the crude hydrolysate of compounds **1** and **9**. This hydrolysate was dissolved in 20 mL of distilled water and extracted three times with an equivalent amount of ethyl acetate. The aqueous fraction was freeze-dried and dissolved in 200 μL of distilled water to yield saccharide polyol sample. The saccharide polyol sample of compounds **1** and **9**, along with standards of D-glucose, D-galactose, D-mannose, gentiobiose, cellobiose, and laminaribiose were analyzed by HPLC equipped with an amino column (Asahipak NH2P-50 4E, 4.6 mm I.D. x 250 mm L, Shodex) and an evaporative light scattering detector for disaccharides or a refractive index detector for monosaccharides. The analysis was performed at a column temperature of 40 °C and an isocratic program of 75% MeCN/25% H<sub>2</sub>O with a flow rate of 0.5 mL/min.

### 1.21 The procedure for **3** and **5** configuration determination

To determine the absolute configuration of compounds **3–6**, **3** and **5** were used as the examples. A sufficient amount of **3** and **5** were isolated through multiple large-scale fermentations of *F. proliferatum* wild type. 5 mg compound **3** or **5** was derived with 5 equimolar *R*-MTPA derivatization reagent and 1 equimolar 4-dimethylaminopyridine (DMAP) in anhydrous dichloromethane at 25 °C for 2 hours, which yield the reaction mixture by vacuum to dryness. The mixtures were then purified by semi-preparative HPLC using isocratic program of 66%/34%-MeCN/H<sub>2</sub>O to gain *S*-MTPA ester **3S** (1.5 mg, *t<sub>R</sub>*=13 min, *R*-MTPA derivative) and **5S** (1.8 mg, *t<sub>R</sub>*=18.5 min, *R*-MTPA derivative). Similarly, 5 mg **3** or **5** was derived with *S*-MTPA derivatization reagent to form *R*-MTPA ester **3R** (1.2 mg, *t<sub>R</sub>*=13 min, *S*-MTPA derivative) and **5R** (1.6 mg, *t<sub>R</sub>*=18.5 min, *S*-MTPA derivative). The absolute configuration of C11 of **3** and C10 of **5** were confirmed as *R* according to Mosher rule.<sup>1</sup>

## 1.22 Purification and structural characterization of compounds

The compounds were separated by medium pressure liquid chromatography (MPLC) Reveleris® X2 (BUCHI, Inc) with a gradient of MeOH and H<sub>2</sub>O at a flow rate of 25 mL/min on 80 g reversed phase silica gel (C18) following. The semi-preparation high performance liquid chromatograph (HPLC) used a Shimadzu LC-20AR Prominence UFLC system and a YMC ODS-A 5 μm 120A (10×250 mm) column was used at a flow rate of 2.5 mL/min, and 0.02% formic acid was added to the aqueous phase. MCI Column chromatography was performed on MCI gel CHP 20P/P120 (37-75 μm, Mitsubishi Chemical Corporation, Japan).

### Isolation of compounds 1–6

For isolation of compounds 1–6, *F. proliferatum* CGMCC 3.4710 was cultured on 14 L solid glycerol medium at 25 °C for 5 days, the cultures were then extracted with a mixture of ethyl acetate and acetone (v:v=3:1) three times. The resulting organic solvent was evaporated to dryness under vacuum to obtain the residues, which were subjected to MCI gel column chromatography using various MeOH-H<sub>2</sub>O eluents (v:v=4:6, 5:5, 6:4, 7:3, 8:2, 9:1, 10:0) to yield seven fractions. Fraction 6 (MeOH: H<sub>2</sub>O, 9:1) was purified by semi-preparative HPLC eluted with 65%/35%-MeCN/H<sub>2</sub>O (0.02% formic acid) to gain compound 1 (11.0 mg,  $t_R$ =14.5 min). Fraction 7 (MeOH: H<sub>2</sub>O, 10:0) was purified by semi-preparative HPLC eluted with 85%/15%-MeOH/H<sub>2</sub>O (0.02% formic acid) to gain compound 2 (7.2 mg,  $t_R$ =19.5 min). Fraction 5 (MeOH: H<sub>2</sub>O, 8:2) was purified by semi-preparative HPLC eluted with 40%/60%- MeCN /H<sub>2</sub>O (0.02% formic acid) to gain compounds 3–6 (8.1 mg, 7.0 mg, 7.3 mg, 5.6mg,  $t_R$ =18.0 min  $t_R$ =22.0 min,  $t_R$ =21.0min,  $t_R$ =25.0min).

### Isolation of compound 7

Transform the pIM2509 into *A. nidulans* protoplasts to construct *AN-proFG* strain for the isolation of compound 7. The *AN-proFG* strain was cultivated in 5 L CD-ST agar medium at 25 °C for 3.5 days. Utilizing the above established method, the crude residues were obtained. The residues then underwent a purification regimen via MPLC with a linear gradient of 60% to 100% MeOH in H<sub>2</sub>O over a period of 60 minutes at a flow rate of 25 mL per minute. The fraction containing compound 7 was purified by semi-preparative HPLC using isocratic program of 80% MeOH-20% H<sub>2</sub>O (0.02% formic acid) to afford compound 7 (7.0 mg,  $t_R$ =24.0 min).

### Isolation of compound 8

Transform the pIM2508 and pIM2510 into *A. Nidulans* protoplasts to construct *AN-proFGIJ* strain for the isolation of compound 8. The *AN-proFGIJ* strain was cultivated in 8 L CD-ST agar medium at 25 °C for 3.5 days. The residues were purified by MPLC with a linear gradient of 40% to 100% MeOH in H<sub>2</sub>O over a period of 60 minutes at a flow rate of 25 mL per minute. The fraction containing compound 8 was purified by semi-preparative HPLC using isocratic program of 60% MeCN-40% H<sub>2</sub>O (0.02% formic acid) to afford compound 8 (14.0 mg,  $t_R$ =13.0 min).

### Isolation of compound **9**

For isolation of **9**, *Fp-ΔproK* strain was cultivated in 14 L solid glycerol medium at 25 °C for 5 days, The residues were subjected to MCI gel column chromatography using various MeOH-H<sub>2</sub>O eluents (v/v=4:6, 5:5, 6:4, 7:3, 8:2, 9:1, 10:0) to yield seven fractions. The fraction 6 (MeOH:H<sub>2</sub>O, 9:1) containing compound **9** was purified by semi-preparative HPLC using isocratic program of 62% MeCN-38% H<sub>2</sub>O (0.02% formic acid) to afford compound **9** (7.6 mg, *t<sub>R</sub>* =14.0 min).

### 1.23 Root growth inhibition assay of *Arabidopsis thaliana*

For the growth inhibition test of compounds **1–9** on *Arabidopsis thaliana*, MS (2.2 g/L Murashige and Skoog basal medium, 10 g/L sucrose, 8 g/L agar) medium was utilized. Compounds **1–9** are dissolved in dimethyl sulfoxide and added to the medium at a final concentration of 50 µg/mL prior to inoculation of growing plants, the control treatment medium contained the same amount of dimethyl sulfoxide. Before planting, *A. thaliana* seeds were surface sterilized with 75% ethanol for 2 minutes, followed by 5% sodium hypochlorite for 5 minutes and subsequently rinsed five times with distilled water. The seeds were then kept in the dark at 4 °C for 2 days for stratification. Then plants were grown under long day conditions (16/8 h light/dark) at 25 °C with cool-white fluorescence bulbs serving as the light resource (15,000 lx). The seven-day-old *A. thaliana* plants were used to for experimental analysis. The total root length of *A. thaliana* was measured by ImageJ software, and the statistical data are plotted with GraphPad Prism 8.0.

### 1.24 Bioinformatics analysis

To elucidate the *pro* gene cluster from *F. proliferatum* CGMCC 3.4710, we used protein sequence hrPKS (FFUJ\_11199) from *F. fujikuroi* IMI 58289 to retrieve FFUJ\_11199 orthologues by using local-blast in public fungal genome database from NCBI and the private database of our lab. The biosynthetic gene cluster annotation was conducted using the 2ndFind program to predict open reading frames and introns. The gene function was assigned based on a BlastP search. The domains of ProF were analyzed by *interpro* website. TMHMM-2.0 transmembrane predictor was used to predict the protein transmembrane helices in ProJ. Active sites analysis of the ProL was performed using DNAMAN8.0 software. The enzyme function initiative-enzyme similarity tool (EFI-EST) was used to generate protein sequence similarity networks (SSNs) of ProK, the SSN was generated using the UniRef90 database with alignment score of 16. Cytoscape software platform for visualizing complex networks of ProK.

2nd Find: <http://biosyn.nih.go.jp/2ndFind/>

NCBI BLAST: <https://blast.ncbi.nlm.nih.gov/Blast.cgi>

*interpro* website: <http://www.ebi.ac.uk/interpro/search/sequence/>

EFI-ENZYME SIMILARITY TOOL: <https://efi.igb.illinois.edu/efi-est/>

TMHMM-2.0: <https://services.healthtech.dtu.dk/service.php?TMHMM-2.0>

## 2. Supplementary Tables

**Table S1.** Stains and plasmids used in this study.

| Stains or plasmids                          | Characteristics                                                                                                                                             | References or sources                                                             |
|---------------------------------------------|-------------------------------------------------------------------------------------------------------------------------------------------------------------|-----------------------------------------------------------------------------------|
| <i>Fusarium proliferatum</i> CGMCC 3.4710   | Host for knockout of the <i>pro</i> gene cluster and the isolation of compound <b>1–6</b>                                                                   | Obtained from the China General Microbiological Culture Collection Centre (CGMCC) |
| <i>Aspergillus nidulans</i> LO8030          | Host for heterologous expression                                                                                                                            | <sup>2</sup>                                                                      |
| <i>Saccharomyces cerevisiae</i> BJ5464-NpgA | Host for heterologous recombination to construct the <i>A. nidulans</i> overexpression plasmids                                                             | <sup>3</sup>                                                                      |
| <i>Escherichia coli</i> BL21                | Host for protein expression                                                                                                                                 | Novagen                                                                           |
| <i>Escherichia coli</i> XL-1                | General cloning host                                                                                                                                        | Stratagene                                                                        |
| pColdI                                      | Protein expression vector used in <i>E. coli</i> , encoding <i>N</i> -terminal 6×His-tag, ampicillin resistance                                             | Takara                                                                            |
| pQ8                                         | Protein expression vector used in <i>E. coli</i> , encoding <i>N</i> -terminal His×6-MBP-His×6-tag, kanamycin resistance                                    | <sup>4</sup>                                                                      |
| pGEX-4T-1                                   | Protein expression vector used in <i>E. coli</i> , encoding <i>N</i> -terminal GST-tag, ampicillin resistance                                               | GE Healthcare                                                                     |
| pYEU                                        | <i>E. coli</i> - <i>Saccharomyces</i> shuttle vector, ampicillin resistance, <i>Ura3</i>                                                                    | <sup>5</sup>                                                                      |
| pANU                                        | <i>E. coli</i> - <i>Saccharomyces</i> - <i>A. nidulans</i> shuttle vector for heterologous expression, ampicillin resistance, <i>Ura3</i> and <i>pyrG89</i> | <sup>5</sup>                                                                      |
| pANR                                        | <i>E. coli</i> - <i>Saccharomyces</i> - <i>A. nidulans</i> shuttle vector for heterologous expression, ampicillin resistance, <i>Ura3</i> and <i>riboB2</i> | <sup>5</sup>                                                                      |
| pANP                                        | <i>E. coli</i> - <i>Saccharomyces</i> - <i>A. nidulans</i> shuttle vector for heterologous expression, ampicillin resistance, <i>Ura3</i> and <i>pyroA4</i> | <sup>5</sup>                                                                      |

**Table S2.** Primers used in this study.

| <b>Primer name</b>         | <b>Primer sequence (5'→3')</b>                                  |
|----------------------------|-----------------------------------------------------------------|
| pYEU- <i>hyg</i> -F        | TACAACGACCATCAAAGTCGTATAG                                       |
| pYEU- <i>hyg</i> -R        | AGGATTACCTCTAAACAAGTGTACC                                       |
| <i>hyg</i> -F              | CCATCCAAGAACCTTTATTTCC                                          |
| <i>hyg</i> -R              | GTTTCCACTATCGGCGAGTAC                                           |
| KO-left-YZ-R               | TTTAGGCTCAAGTCATGACC                                            |
| KO-right-YZ-F              | TGGGTTTCGCAAAGATAATTGC                                          |
| pYEU-KO <i>proA</i> -UP-F  | ATTATAAGGATGATGATGATAAGACTAGTATTAATGTTAATAA<br>GTAGTACTATTGTCAC |
| pYEU-KO <i>proA</i> -UP-R  | CACTGGTAGCTATACGACTTTGATGGTCGTTGTACCTCTTTTGT<br>AGAGACTCACAG    |
| pYEU-KO <i>proA</i> -DN-F  | GAATGCACAGGTACACTTGTTTAGAGGTAATCCTTGAGGTGAT<br>AAATGAGGTGATTG   |
| pYEU-KO <i>proA</i> -DN-R  | CATTTAAATTAGTGATGGTGATGGTGATGCACGTGAGAAGACG<br>AAGATAAAGGCATTG  |
| KO <i>proA</i> -left-YZ-F  | GAGTGAATGCAGGTGATGGAAG                                          |
| KO <i>proA</i> -right-YZ-R | CCGATAGCCCAGAACATTTGC                                           |
| pYEU-KO <i>proL</i> -UP-F  | GGCTAGCGATTATAAGGATGATGATGATAAGACTAGATGTCTG<br>TGGCCAGAACGAG    |
| pYEU-KO <i>proL</i> -UP-R  | CTGGTAGCTATACGACTTTGATGGTCGTTGTAAGGCACGG<br>AGTATTCAGTCTAAG     |
| pYEU-KO <i>proL</i> -DN-F  | CCCAGAATGCACAGGTACACTTGTTTAGAGGTAATCCTCCAAG<br>ACACCGGTGTC      |
| pYEU-KO <i>proL</i> -DN-R  | ATTTAAATTAGTGATGGTGATGGTGATGCACGTGCTCCTCTTTT<br>ATAATACAAAAGGGC |
| KO <i>proL</i> -left-YZ-F  | GGTTGGCCAGGAATGTACG                                             |
| KO <i>proL</i> -right-YZ-R | GGCCTACTTTTAGCTATTTAATT                                         |
| pYEU-KO <i>proC</i> -UP-F  | CTAGCGATTATAAGGATGATGATGATAAGACTAGCGTTTGAAC<br>TCACAAATGAGGATTC |
| pYEU-KO <i>proC</i> -UP-R  | CACTGGTAGCTATACGACTTTGATGGTCGTTGTAACGTAATATC<br>GAGAGATCTGCAAG  |
| pYEU-KO <i>proC</i> -DN-F  | GCACAGGTACACTTGTTTAGAGGTAATCCTGTTGACCAGTGAT<br>GTATGTCTATCC     |
| pYEU-KO <i>proC</i> -DN-R  | GTCATTTAAATTAGTGATGGTGATGGTGATGCACGTGGCAGCC<br>TCTGGGTTATGAGTG  |
| KO <i>proC</i> -left-YZ-F  | GTTATGGTAGCAGCCCAGGTC                                           |
| KO <i>proC</i> -right-YZ-R | GCGAGAAAGGTATGGTTCTAGG                                          |
| pYEU- KO <i>proD</i> -UP-F | GGCTAGCGATTATAAGGATGATGATGATAAGACTAGTGTCTTG<br>TTTGTCTGCCCCGAC  |
| pYEU-KO <i>proD</i> -UP-R  | CTGGTAGCTATACGACTTTGATGGTCGTTGTAGTTAAAAAAGG<br>TAACGAGCGATGAAG  |
| pYEU-KO <i>proD</i> -DN-F  | CCAGAATGCACAGGTACACTTGTTTAGAGGTAATCCTTTGACG<br>GATTCGCGCATG     |
| pYEU-KO <i>proD</i> -DN-R  | GTCATTTAAATTAGTGATGGTGATGGTGATGCACGTGAACCTCG<br>CCGAGAAGGCGG    |
| KO <i>proD</i> -left-YZ-F  | CAGTTCTCCTTGTTCTTAATGTC                                         |
| KO <i>proD</i> -right-YZ-R | GCTACTACGACTATCACAACGG                                          |
| pYEU- KO <i>proE</i> -UP-F | CATATGGCTAGCGATTATAAGGATGATGATGATAAGACTAGCG<br>CGTCATCAAGGCTTTC |
| pYEU-KO <i>proE</i> -UP-R  | CACTGGTAGCTATACGACTTTGATGGTCGTTGTAATATCGAT<br>AGGGGCATCGTTG     |
| pYEU-KO <i>proE</i> -DN-F  | GCACAGGTACACTTGTTTAGAGGTAATCCTTTTGGTTCTATTTT<br>TGGAGGTCTATC    |
| pYEU-KO <i>proE</i> -DN-R  | GTCATTTAAATTAGTGATGGTGATGGTGATGCACGTGTGCGCG<br>AGCTCATTGATG     |
| KO <i>proE</i> -left-YZ-F  | CCTTGATGGAACACCTCG                                              |
| KO <i>proE</i> -right-YZ-R | CATCATCGGGTCCCTTCAC                                             |

| Primer name                | Primer sequence (5'→3')                                          |
|----------------------------|------------------------------------------------------------------|
| pYEU- K <i>OproI</i> -UP-F | CTAGCGATTATAAGGATGATGATGATAAAGACTAGTCAGTTGAA<br>CAGACAGCTAAGGC   |
| pYEU-K <i>OproI</i> -UP-R  | CTCACTGGTAGCTATACGACTTTGATGGTCGTTGTAGATGAGG<br>TTTGTGCTGGTGAAC   |
| pYEU-K <i>OproI</i> -DN-F  | CCAGAATGCACAGGTACACTTGTTTAGAGGTAATCCTCTTCGA<br>GCCCAAGCTACTC     |
| pYEU-K <i>OproI</i> -DN-R  | CATTTAAATTAGTGATGGTGATGGTGATGCACGTGAACCTTGA<br>CTTATTTCACTCAGA   |
| K <i>OproI</i> -left-YZ-F  | GCTCGGCATTGCGTATCATAAC                                           |
| K <i>OproI</i> -right-YZ-R | CGAATTGCTGGCGCAGAG                                               |
| pYEU- K <i>OproK</i> -UP-F | GGTAGCGATTATAAGGATGATGATGATAAAGACTAGTGAAGA<br>CACCCATGGACAGC     |
| pYEU-K <i>OproK</i> -UP-R  | CCTCACTGGTAGCTATACGACTTTGATGGTCGTTGTAATTTCTA<br>GCCTGGCGTGC      |
| pYEU-K <i>OproK</i> -DN-F  | CAGAATGCACAGGTACACTTGTTTAGAGGTAATCCTAGAAGCG<br>GTTTTCTAGGCAC     |
| pYEU-K <i>OproK</i> -DN-R  | CATTTAAATTAGTGATGGTGATGGTGATGCACGTGTTGAACTG<br>AGTTGTCATCTGCC    |
| K <i>OproK</i> -left-YZ-F  | GCGCTTATAGCTTCCATCTCC                                            |
| K <i>OproK</i> -right-YZ-R | CTTTGCCAATTCGAAGAGTCTTC                                          |
| <i>amyB</i> -F             | GATTAAGGTGCCGAACGAGC                                             |
| <i>amyB</i> -R             | AAATGCCTTCTGTGGGGTTTATTG                                         |
| <i>glaA</i> -F             | CCTGATCTTCCGAAGTGGTGC                                            |
| <i>glaA</i> -R             | TGCTGAGGTGTAATGATGCTG                                            |
| <i>gpdA</i> -F             | ACTCCGGTGAATTGATTTGGG                                            |
| <i>gpdA</i> -R             | TGTTTAGATGTGTCTATGTGGC                                           |
| pANU- <i>proF</i> -F1      | CTGAGCTTCATCCCCAGCATCATTACACCTCAGCAATGTCGGC<br>ATACACCAAAGATATC  |
| pANU- <i>proF</i> -F2      | GGTCTGCAGACTCTCTGTGCTCCCCGTGCCACTGCC                             |
| pANU- <i>proF</i> -F3      | GGCGGACTTTGCGTCCATCAATCGTAAGAACCCTTC                             |
| pANU- <i>proF</i> -R1      | GGCAGTGGCACGGGGAGCACAGAGAGTCTGCAGACC                             |
| pANU- <i>proF</i> -R2      | GAAGGGTTCTTACGATTGATGGACGCAAAGTCCGCC                             |
| pANU- <i>proF</i> -R3      | GGAGGACATACCCGTAATTTTCTGGGCATTTAAATTTCCAGTT<br>GGCCGGCCGTAGTCA   |
| pANU- <i>proFG</i> -R3     | TCACCCAAATCAATTCACCGGAGTTTTCCAGTTGGCCGGCCGT<br>AGTCAAACCACCACAG  |
| pANU- <i>proG</i> -F       | CTAACCATACCCCGCCACATAGACACATCTAAACAATGAGGT<br>TTCTTTGCTTGCAATG   |
| pANU- <i>proG</i> -R       | GGAGGACATACCCGTAATTTTCTGGGCATTTAAATTCGAACTT<br>CACTACTCCGTTTCAA  |
| pANR- <i>proG</i> -R       | TAGGTCGCCAGGTACGACCAGTTCGGAAGATCAGGTTCGAACTT<br>CACTACTCCGTTTCAA |
| pANR- <i>proI</i> -F       | CTGAGCTTCATCCCCAGCATCATTACACCTCAGCAATGACAGA<br>CAAGAAACCCATTCGT  |
| pANR- <i>proIJ</i> -R      | CCTTCTCTGAACAATAAACCCACAGAAGGCATTTATGCCTAG<br>TTCCGAGTTGGCGCAC   |
| pANR- <i>amyB-proJ</i> -F  | AGGGTATCATCGAAAGGGAGTCATCCAATTTAAATGATTAAAG<br>GTGCCGAACGAGCTAT  |
| pANR- <i>proE</i> -F       | CCATTACCCCGCCACATAGACACATCTAAACAATGGACACATT<br>CGACGTCATAATTG    |
| pANR- <i>proE</i> -R       | CATAGGTCGCCAGGTACGACCAGTTCGGAAGATCAGGAGGAT<br>AGGGAAGGGATTGAG    |
| pANR- <i>proJ</i> -F       | CTAACCATACCCCGCCACATAGACACATCTAAACAATGCCTA<br>GTTCCGAGTTGG       |
| pANR- <i>proJ</i> -R       | CTAAAGGGTATCATCGAAAGGGAGTCATCCAATTTAAATCTTC<br>GAGCCCAAGCTACTC   |
| pANP- <i>proK</i> -F       | CCTTCTCTGAACAATAAACCCACAGAAGGCATTTATGGCTAG<br>GGAGTATTCGGG       |
| pANP- <i>proK</i> -R       | GACCAACAACCATGATACCAGGGGATTTAAATCTGTACCACG<br>TCAGTAACCCTC       |



| <b>Primer name</b>                   | <b>Primer sequence (5'→3')</b>                                 |
|--------------------------------------|----------------------------------------------------------------|
| pANP- <i>proL</i> -F                 | CTTCTCTGAACAATAAACCCACAGAAGGCATTTATGTATCGA<br>CTCAGTTTGGCATC   |
| pANP- <i>proL</i> -R                 | GACCCAACAACCATGATACCAGGGGATTTAAATGTGTATGGGC<br>AACAATATCCCCAAC |
| pANP- <i>proL</i> -D266A-F           | GCTTGGTTTTGAGGGCTATGTCATGTCGGCTTTTCTGGCTACGC<br>CGCCTGGACTTGG  |
| pANP- <i>proL</i> -D266A-R           | GCCAGAAAAGCCGACATGAC                                           |
| pANP- <i>proL</i> -E493A-F           | GCCACCGCTGGTTTTGATC                                            |
| pANP- <i>proL</i> -E493A-R           | GTCTTGCATCAAAACCAGCGGTGGCGAAAGATTTGAGGAAG<br>ACTATACAGACCG     |
| <i>proA</i> -YZ-F                    | CTGTCAAAATCAGGTGCCCAAC                                         |
| <i>proA</i> -YZ-R                    | GCAGTTCTCTATGTCGATCAGAG                                        |
| <i>proC</i> -YZ-F                    | ATGGCAGTTACTTCAATTTAC                                          |
| <i>proC</i> -YZ-R                    | TCAGGCCTCAATATCACCAATTTTG                                      |
| <i>proD</i> -YZ-F                    | ATGTTTACCGCTTTGTTTCTTTCTG                                      |
| <i>proD</i> -YZ-R                    | TCAGACATGGCGGTGG                                               |
| <i>proF</i> -YZ-F                    | TGCCCTAGCCGCTCTGGCAGAAGCTCTC                                   |
| <i>proF</i> -YZ-R                    | CAGATCAACGAGCACACGCGGCTGTGCTG                                  |
| <i>proJ</i> -YZ-F                    | ATGCCTAGTTCCGAGTTGGCGC                                         |
| <i>proJ</i> -YZ-R                    | CTACTTGATCAGGTTCTCAACC                                         |
| <i>proK</i> -YZ-F                    | GGCTAGGGAGTATTCCG                                              |
| <i>proK</i> -YZ-R                    | CTACCAAAAGTACTCGTCAAATCCCTC                                    |
| pGEX 4t-1-ProG-F / <i>proG</i> -YZ-F | CCGGAATTCATGAGGTTTCTTTGCTTGCATGG                               |
| pGEX 4t-1-ProG-R / <i>proG</i> -YZ-R | AAGGAAAAAAGCGGCCGCTATACAGCGGTCATGGCCTTATC                      |
| pQ8-ProE-F / <i>proE</i> -YZ-F       | CCGGAATTCATGGACACATTCGACGTCAT                                  |
| pQ8-ProE-R / <i>proE</i> -YZ-R       | CCCAAGCTTTACAGCTGCTTTCCCTC                                     |
| pQ8-ProI-F / <i>proI</i> -YZ-F       | CCGGAATTCATGACAGACAAGAAACCCATTC                                |
| pQ8-ProI-R / <i>proI</i> -YZ-R       | AAGGAAAAAAGCGGCCGCTCATACTCCTTCTTCATCTCAC                       |
| pColdI- ProL-F / <i>proL</i> -YZ-F   | GGGAATTCATATGATGTATCGACTCAGTTTGGCATC                           |
| pColdI- ProL-R / <i>proL</i> -YZ-R   | CCGCTCGCGTTATTTTACCAGTTGAACGGTTGTC                             |

**Table S3.** Plasmids used in this study.

| Name     | Description                                                                                                | Enzyme site                     | Aim                               |
|----------|------------------------------------------------------------------------------------------------------------|---------------------------------|-----------------------------------|
| pIM2501  | <i>proA</i> upstream 2,000 bp, <i>proA</i> downstream 2,000 bp, and <i>hygB</i> resistance gene in pYEU    | <i>Spe</i> I- <i>Pml</i> I      | <i>F. proliferatum</i> knockout   |
| pIM2502  | <i>proL</i> upstream 2,000 bp, <i>proL</i> downstream 2,000 bp, and <i>hygB</i> resistance gene in pYEU    | <i>Spe</i> I- <i>Pml</i> I      | <i>F. proliferatum</i> knockout   |
| pIM2503  | <i>proC</i> upstream 2,000 bp, <i>proC</i> downstream 2,000 bp, and <i>hygB</i> resistance gene in pYEU    | <i>Spe</i> I- <i>Pml</i> I      | <i>F. proliferatum</i> knockout   |
| pIM2504  | <i>proD</i> upstream 1,998 bp, <i>proD</i> downstream 2,000 bp, and <i>hygB</i> resistance gene in pYEU    | <i>Spe</i> I- <i>Pml</i> I      | <i>F. proliferatum</i> knockout   |
| pIM2505  | <i>proE</i> upstream 2,000 bp, <i>proE</i> downstream 2,000 bp, and <i>hygB</i> resistance gene in pYEU    | <i>Spe</i> I- <i>Pml</i> I      | <i>F. proliferatum</i> knockout   |
| pIM2506  | <i>proI</i> upstream 2,000 bp, <i>proI</i> downstream 2,000 bp, and <i>hygB</i> resistance gene in pYEU    | <i>Spe</i> I- <i>Pml</i> I      | <i>F. proliferatum</i> knockout   |
| pIM2507  | <i>proK</i> upstream 2,000 bp, <i>proK</i> downstream 2,000 bp, and <i>hygB</i> resistance gene in pYEU    | <i>Spe</i> I- <i>Pml</i> I      | <i>F. proliferatum</i> knockout   |
| pIM 2508 | <i>proF</i> gDNA with downstream 500 bp, in pANU                                                           | <i>Not</i> I                    | <i>A. nidulans</i> overexpression |
| pIM 2509 | <i>proF</i> gDNA with downstream 500 bp, <i>proG</i> gDNA with downstream 144 bp, in pANU                  | <i>Not</i> I                    | <i>A. nidulans</i> overexpression |
| pIM 2510 | <i>proG</i> gDNA with downstream 144 bp, <i>proI</i> gDNA with downstream 193 bp, <i>proJ</i> gDNA in pANR | <i>Bam</i> H I                  | <i>A. nidulans</i> overexpression |
| pIM 2511 | <i>proE</i> gDNA with downstream 92 bp, <i>proI</i> gDNA with downstream 193 bp, <i>proJ</i> gDNA in pANR  | <i>Bam</i> H I                  | <i>A. nidulans</i> overexpression |
| pIM 2512 | <i>proJ</i> gDNA with downstream 193 bp, in pANR                                                           | <i>Bam</i> H I                  | <i>A. nidulans</i> overexpression |
| pIM 2513 | <i>proK</i> gDNA with downstream 500 bp, in pANP                                                           | <i>Bam</i> H I                  | <i>A. nidulans</i> overexpression |
| pIM 2514 | <i>proL</i> gDNA with downstream 488 bp, in pANP                                                           | <i>Bam</i> H I                  | <i>A. nidulans</i> overexpression |
| pIM 2515 | <i>proL</i> -mutation(D266A) gDNA with downstream 488 bp, in pANP                                          | <i>Bam</i> H I                  | <i>A. nidulans</i> overexpression |
| pIM 2516 | <i>proL</i> -mutation(E493A) gDNA with downstream 488 bp, in pANP                                          | <i>Bam</i> H I                  | <i>A. nidulans</i> overexpression |
| pIM 2517 | <i>proG</i> cDNA in pGEX 4t-1 with <i>N</i> -GST tag                                                       | <i>Eco</i> R I- <i>Not</i> I    | <i>E. coli</i> overexpression     |
| pIM 2518 | <i>proE</i> cDNA in pQ8 with <i>N</i> -MBP tag                                                             | <i>Eco</i> R I- <i>Hind</i> III | <i>E. coli</i> overexpression     |
| pIM 2519 | <i>proI</i> cDNA in pQ8 with <i>N</i> -MBP tag                                                             | <i>Eco</i> R I- <i>Not</i> I    | <i>E. coli</i> overexpression     |
| pIM 2520 | <i>proL</i> cDNA in pColdI with <i>N</i> -His tag                                                          | <i>Nde</i> I- <i>Xho</i> I      | <i>E. coli</i> overexpression     |

**Table S4.** The protein sequence of *pro* gene cluster.

| Protein name     | Protein sequence                                                                                                                                                                                                                                                                                                                                                                                                                                                                                                                                                                                                                                                                                                                              |
|------------------|-----------------------------------------------------------------------------------------------------------------------------------------------------------------------------------------------------------------------------------------------------------------------------------------------------------------------------------------------------------------------------------------------------------------------------------------------------------------------------------------------------------------------------------------------------------------------------------------------------------------------------------------------------------------------------------------------------------------------------------------------|
| ProA<br>(551 aa) | <p>MKSIPSILVAAAIPSLASGQSFQSTPIMGWNSYNQVSCSPTNKTTITTAIEALSSR<br/>           GFVNAGYKFFQIDCGWASRDAQRDPTTGALKIDSDAFPDGLKPLSDLARSK<br/>           GMKWTMYSDAGVRMCDPQYPSVLSGLGHEAVDAAFFKSLNTEYLKYDN<br/>           CYADSASNNAPKDPRTDFVTRFGTMWSELQKVGIPGMLICQWGVYSSSSG<br/>           LEGPAEWTQNVSTSFRLSDDIAEGWGNVYRISNQAIHIAHRGLSGPGHIADA<br/>           DLLEVGNSGMTFDEQATHFALWAMLKSALMISTDITALSDQTVAVLQNKDL<br/>           ISINQDAAVKPVSLVQRWTSRDLWAGPLANGDVAVLYVDQSNSARTLSLQ<br/>           LSNLGYQSADIKDLWTGKTTTGASSFSKQVNGHGSVALRLSNIKKLSSTANY<br/>           KYTSVSTGSLSSGAKTASCSCGCTSSTKVGNGVGSANGQVVLSNISTSKATQN<br/>           VLFDYINGDVGFSFTGSTNDRLASIKVNGGTAQIVSFPLTGYNWDKDVYKG<br/>           YAVELSGFNTSGPNTITISGVNSGWAPDFDRLAVVA</p> |
| ProC<br>(539 aa) | <p>MAVTSISLLVLGIVAGATIFYLSSPTRKDRKRPLKLPPIIGDIHNSPIEKPLL<br/>           RWD AWWKENGAIATSKLFGIMPVVVINTAEAAATELLGKRGAWYSNRPRSVGME<br/>           MITGAGPGQSRFTLMHMDAHLKLHHRILSPSLGGVAAPRYQPVMELEAKQ<br/>           LVKDLVELSEHKSVVVTSDDVFPFLERAQASIALHYSVRVPTLDYPLYQR<br/>           VRETQAKVTSYASRPLPDIFFLAKLPAAISPWRRADKLFNEQKDLNLHL<br/>           LSLGDDSPGWNATKQARSLAAKYAKEPIPDIDLAFTLATS VQGGIETSTRIL<br/>           WLFIAAMTANRSFMKRAHDVLDVAVVGRDRLPCFADRSSLCYIDAIVSELLR<br/>           WRPISPGGVP RRADKQDSFKGINIVKNAMVLTNAWSIGRDEAVFDQSLGDL<br/>           DQFIPERWLDGESIGVDIKNQGELRTSLPLPVFGHGRRSCLGKRVAVDGTF<br/>           A QVATMIWAFDFEPTQDVDEMEMEVVWFMTEPKQFKFLKPRGSWVSKVIE<br/>           EEWRTADKDLGKIMGKIGDIEA</p>             |
| ProD<br>(312 aa) | <p>MFTALFLSALAWSQMANAHGTITRIGANGVVMPLTILDGTPRSSTSAASG<br/>           AQVDTSVIRDPELGTSKASALGRTSKGPVDGARVIKAFMHGLKGRSLADTIL<br/>           GGGEEATREAVSFVTGNAGAVVNGVQDGIESPVGGLALGAEHGVNGLLD<br/>           DFFQTAKGVPSPRGYIEDGVQNSTGVGAKSGLPTTASDGTCLKLIYHQVNEDG<br/>           AGPLLVDIDFTSGGTDPKAFKSAE VVQNIIGVLGFSTVSSTDFPVVVKVPTGQ<br/>           VCTGKVAGVSGICIARVRNSATAGPFGGAAAFTHNPEAAKGTSSAKFRHR<br/>           HV</p>                                                                                                                                                                                                                                                                                                                 |
| ProE<br>(489 aa) | <p>MDTFDVIIVGAGLAGINAAYRLQIALPNLSYAILEARDDIGGTWDLFRYPGIR<br/>           SDSDLTYTFGFAWQPWDQGTALGEGGAILNYMKKCAQTYGIDRHVHCQRRL<br/>           KHASWSTPQQKWTLEVEDIGAQKELQYHARFVMLCTGYDYHNGRDTAIP<br/>           GLENFKGQVVHPQFWPEDLDYTNKQVAVIGSGATAITLIPKLAEKAARTTM<br/>           VQRSPSYILSIPNGGKKAPWLVRLF PARWAHAYTRLSFLIWSRLIWLFCQTFP<br/>           DRARQLRNGVEKELPHHLPHYDPHFSPRYNPWDQRVCLTPNADFFKCLHTG<br/>           KADVKTGNIKEVVADGIVLENAPQDRIPAAIIITATGLKLQLAGGATIDVDGV<br/>           PIKPSEQYFWNGTMLQDVPNLSLVIGYTTISWTLGVDTAAMLVCRLLQKM<br/>           Q KAKLSSATPRAEQGLALTPRRLSLSSTYVTTAESELPRAAAQAPWQPRNTY<br/>           LSDYWFVKLGRGLDRGLQFVREGKQL</p>                                                                            |

| Protein name      | Protein sequence                                                                                                                                                                                                                                                                                                                                                                                                                                                                                                                                                                                                                                                                                                                                                                                                                                                                                                                                                                                                                                                                                                                                                                                                                                                                                                                                                                                                                                                                                                                                                                                                                                                                                                                                                                                                                                                                                                                                                                                                                                                                                                                                                                                                                                                                                                                                                                                                                                                                                                                                                                                                                                                                                                                                                                                                                                                   |
|-------------------|--------------------------------------------------------------------------------------------------------------------------------------------------------------------------------------------------------------------------------------------------------------------------------------------------------------------------------------------------------------------------------------------------------------------------------------------------------------------------------------------------------------------------------------------------------------------------------------------------------------------------------------------------------------------------------------------------------------------------------------------------------------------------------------------------------------------------------------------------------------------------------------------------------------------------------------------------------------------------------------------------------------------------------------------------------------------------------------------------------------------------------------------------------------------------------------------------------------------------------------------------------------------------------------------------------------------------------------------------------------------------------------------------------------------------------------------------------------------------------------------------------------------------------------------------------------------------------------------------------------------------------------------------------------------------------------------------------------------------------------------------------------------------------------------------------------------------------------------------------------------------------------------------------------------------------------------------------------------------------------------------------------------------------------------------------------------------------------------------------------------------------------------------------------------------------------------------------------------------------------------------------------------------------------------------------------------------------------------------------------------------------------------------------------------------------------------------------------------------------------------------------------------------------------------------------------------------------------------------------------------------------------------------------------------------------------------------------------------------------------------------------------------------------------------------------------------------------------------------------------------|
| ProF<br>(2649 aa) | MSAYTKDIMNNGDAIPEPLVQAVLQQDKSMPIAIVGMACKLPGEATNPKL<br>WELCAERKAAWSEVPKERMNIDSFWHPDGERGGNTNAKGGHFLKQDVAA<br>FDASFFSIPTEAKSIDPQQRILMETVYEAMESGGMSMEDMAGSGTSCYVGS<br>FSRDYYEIIDRDPETAPLYSVTGNAAILSNRISYFYDLKGPSLTLDACSSSL<br>VALHLACQSLRSGESHCSIVGATNLILNPDIIITAMSNMHFFSPDSRCYSFDAR<br>ANGYSRGEGLACILKPLADAIRDNDTIRAVIRGTACNQDGKTSIMLPSREA<br>QEELIKTAYRDSGCDFAATTAYFEAHGTGTQAGDPLESGAIGSTFGPHRPVDE<br>NGCKLPLYIGSVKTNVGHTEGTSGLAGVIKAVLSLGERGAIAPNVYFETPNPQI<br>DLEGWNLRVPTKVIWPTKGQRRISVNSFGFGGTNGHVILDDAFHYLNGRG<br>LKGARTAPRPLDLQTGIAMSNAIAPVLSNGNGVNGHTNGHTNGPTNGYT<br>NGHSNGHSLSSAKRHRVFIWSTHEENIAGKSAAVYAEHLAHRKEADEEAFL<br>DNLSYTLCSRRSMLPWKSLVAQSLPDLAEKVAATRQKPVRAISPLKIGFV<br>TGQGAQWFAMGRELIQTYPLFQQRLEYSDFVKSGLAKWSLIDELNKDEET<br>SRINESLVSQTACTALQLALVDLLASWGIRPQKVIGHSSGEIAAAYASGILPTE<br>SALKAAYFRGLHSSRVQEKLPADGAMMAVGLAEEDANNYISALAPELKG<br>ASVACINSPTNVTVSGDRPALAALAEALQKDSVFARLLKVSTAYHSHHMDA<br>VASDYEHSLAGMEVNTPTSETIEMVSAVTGELLKSSDILGPKYWGENMVS<br>PVLEKSGIVYKSVLSRQDACATALEAAAFKAGCTTIDLYKVNPAAGSHT<br>AQRVLDLPPYFWNHTKSHWMSRSLSEHRFRRHARTDFLGYVNDWNP<br>MDPRWRNLRLREQPWLKGHIVQGSYVYPGTGYLCMALEAMYHLRQMPEY<br>TAPQGFVGYRLKDVKLIRALMPASEEGVETLFLSLRHYKESTASYSNNWY<br>EFRVFSWAADGWAEHAHGMITAVYDAPNTAHLNRIPFNPTMDIAVDLENF<br>AGTRTAENLYDIVDAVGLVYEEFPRNLTGDLVSNEGTAAGVVTVPDTKSLM<br>PFEFEYPYLHPATMDGFVQMVFPALLHAQTSIASPYLPVFFADTFVRGDIA<br>QAAGHRFDICIATAGYTGREVTTNVLVRDEGTGDVAVVSFKDKCSGVDSGE<br>NANDGLSGREAIKCLCFHSTWHPDPELLSQDKGDELMRSFIPVPEDPQRVAN<br>LESIAYYYYYRVLQTVTEDQVPSMKPHHQKFFRFMQYQSDLVLAHKSHPQT<br>PEWEQLDDPVISQKMENTAVRLEPSGTAQLICRVGRKLDKILTGVDPLAL<br>MLEDELLYKYYESVMGYDIHYAEILANKNPNMQVLEIGGGTGGATAPILS<br>AFGGNNGKYPKFTSYTFTDISSGFFEEAETKFKDWEGLVEYRRLNIEEDPVD<br>QGFEAGKYDLVVAASVLHATANITRLENTRKLLKPGRLILVEISNILNQAF<br>LLFGCLPGWWMSEESYRPWGPTMDQDMWAEHLKRVGFSDLTLAAPDSEDP<br>KDELGRVFCVAVEQPAPPSVDPSISSVVLIVDDGAPSDLEQCIDEKFSKLG<br>PVRRLRLAEAADTPLENTCCVSLAEVNRSVIKDMTLAEFEGIKTIFKSSRALL<br>WVTEGAFNNASRPESALFHGLARSLRAENETFPLTTADFASINRKNPSETAQ<br>QLELLKQVLRNPGTQEPEYHYEDGSWKVCRCLSDASQAQIHGCLHHESA<br>VSDKTELQPFYQGRPLKLSIKTPGLLDTLRFEDDPLPAEPLGTDEVEVEVKA<br>SGVNFRDIMICTGQMSDPSLGLECAGIVHRVGDVNSNVKVGQRVVAWTRY<br>NYSNYARTPACVVQPIPDDMSYATAASLPVYNTVIYGLQHMARLRKGESIL<br>IHAAAGGVGQAAITLAQRLGADIFVTGTQDKRDLKSEFGIPDERIFSSRGI<br>SFVQDIKKATNGRGVDVVLNSLAGEMLSATWDCIATFGRFIEIGKKDMIDNR<br>RLDMAPFLRNVMFASIDLITVYEQNISLAGELLHETMDLIRTKAIKPIPRIKIFS<br>FSQFEEAFRFMQQGHVKGKIVMPEENDMVAIPASSGPFTFQEDASYLITGF<br>GGLGRSMARWMASRGAKNLIFASRSGDSRPEVRELIDELAEVGTTRVKALPV<br>DITNGPALDAAIRGIADSFPLRGVVQAAMVLDDAIFDNMSLKSFNNGIRPK<br>VQGTWNLHQSTLNQPLDFFVIMASSVGLGNSGQANYAGNAYEDALAQY<br>RRSQGLPAISVDLGMILSVGAVAQDSTGMIRNNLESKGFVIEEDEFLETALET<br>SIRESSSSAASQMITGIQTQSTVPGDDGVPVDEPFWKSSPVFVSHLPKLGARSS<br>GQSNNAGEQSIQSLKGLLTDVAVTVIDAMTIKLSRSLMMDVAELDPTRP<br>TSAFGIDSLVAVELRNWFQKHKMADIAVFEILQTNLQTLAFLRVAEKSTLVE<br>GSLADGQ |

| Protein name     | Protein sequence                                                                                                                                                                                                                                                                                                                                                                                                                                                                                                                                                                                                                                                                                                                                                                                                                                                    |
|------------------|---------------------------------------------------------------------------------------------------------------------------------------------------------------------------------------------------------------------------------------------------------------------------------------------------------------------------------------------------------------------------------------------------------------------------------------------------------------------------------------------------------------------------------------------------------------------------------------------------------------------------------------------------------------------------------------------------------------------------------------------------------------------------------------------------------------------------------------------------------------------|
| ProG<br>(253 aa) | MRFLCLHGAGTNSDVLDIQTGPIRDSLSDSNATFKFYDGFWDVEPVVEEIKNIFA<br>GPFYTWYSPGLGGRTLTEAKAELLDLIATEGPFDACMGFSQGAALLAAVIID<br>HQVQNPFGPNLFKFAAFICGGSPLLVTKALEQDHLDYQPTVDRMAPLTEPW<br>LGPYVPGHEPHDPDEQWNMLVAHRVREAGLTIRIPTAHIYGAKDHTVKESLN<br>LRDMCDPRRRVEFDHGGREHVPRATRVRVQMMAMTLRRGIDKAMTAV                                                                                                                                                                                                                                                                                                                                                                                                                                                                                                                                                                                   |
| ProI<br>(439 aa) | MTDKKPIRVAIIGAGPGGLVLAQTLRQDPRFSVTVYERGVDRDGSVSSLVGF<br>RILLPPSILDNLRSQLPASVATLIDDAIGVPQAQGNRVAFMDEQCGLICRLDVQ<br>QSRDMCSVSRWKLREALLHDAEEIVQFGKQFSSYEQLGGESGDVKVRFADG<br>DEIECDVLVGADGAGSKVRKLLLPNSQRSASGLTVVYFKAPFTPETEAMIPW<br>KSGCVAITPRRSMVVAYYKDRRRPYGPDLEKIDPADSFLMFGLGCYTNEF<br>VNQSKHPDEMTPPEELKDECLARAKDWSPLLRALIALSVSSVVFVSHVKTQDP<br>IKPWESGRVTLLGDAHSMTPYLGKGASSAMIDAMSLAKALKSEPKQGGQ<br>DFLKAQLSIYEEAMLKHGFEAARQSMTAQKFTFNAGDTPWKCWWRNLALK<br>AWDWWMSHPPAMEENFPVSYSEMKKDV                                                                                                                                                                                                                                                                                                                                                                              |
| ProJ<br>(549 aa) | MPSELAHPSRKILLVVTGGFTHASPVFEIGKILAVRGHTIEFATLEGQEA<br>TKGYEFITKVHTLGPPTHQMNNAHYLRMRTWDISKGISGTMPSKYLWDSF<br>WPQTYRGLKAIMDDPKTRPSMMIADFFVDAVKDIHVEYNLPITQVWPQMPF<br>LMMPCSYIPGQPGFQLEGTLTSEHASLWHRIKNELVIFFDLPVIVKWMKWT<br>KMRLGVKYPHKKIQKPDYLIFVNSFLGLEIPRDLPTCAPVGPLISDTPPL<br>NEECKQFLT KHTKVVIYIALGTHIILTNADA AKIINGLLLLLEGSLLDGVISIP<br>KSGRQDLVDNNTYK TGNKTLRLGDILDGKNPDWLCSTFVPQRAILDHPSTKL<br>YYTHGGSSANEGLFHGVPMLSMGVFMQISNTARLVGGVAEPLNKRFT<br>SQEIYKAKKILLDGDGSYKRNSLRMLRIAHVAARRKKHAADLVEELIYDTE<br>LRFKDGKELRPMHLQTADMRMPVWKAKNWDIWA VSLLGIGAVFGGLGIG<br>GRMLWLHRVWLTG SVKGFVGSQEWLRNLIK                                                                                                                                                                                                                                                                |
| ProK<br>(142 aa) | MAREYSGTCITAVDTPYLQASKSLSEVAFAGDEWIQSIQAINGLMDLAPAFD<br>TDTLYVDDWTKVSMEEMNFGQEQHMFQPLEVEALPVRNWCMIYSAKAA<br>NAGDANSLGYQVQVVVLKGRAAEILINGIVTDLQEGFDEYFW                                                                                                                                                                                                                                                                                                                                                                                                                                                                                                                                                                                                                                                                                                              |
| ProL<br>(775 aa) | MYRLSLASLLSLALP VVAGSQLSSAIDPSQWL NARGKADSLTSKMTLEEKSS<br>MVTGTFDGT CIEHIAPL KRLGFGGLCIQDGP IGLRLGDLVSVFP SGVTTAATW<br>DRQLMALRGEAMAEFEKAKGAHVILGPVAGALGRSPYGGRNWEGFSPDPY<br>LTGIAMGETIRAIQDTGVQATAKHLVGNEQETQRKPTLINGKMVDVSSNID<br>DRTMHELYMWPFA DAVHAGVSSVMCGYNRVNGTYSCENKHLINLLKKE<br>LGFEGYVMSDFLATPPGLGPVKAGLDMNQGPVNPLSPVDTYWGDNLVEC<br>VKNKTLSESDLNGMVRRLTPYFYLQDKDYPSKDPSSQPLVYNGFGYPYPG<br>PSPVGRDVRGNH SALIREIAAAGTVLLKNQGSILPLNKSLTNIGLFGNDAADP<br>SVGTLFSDHDGIDIGTLISGGSGSGRPSYVISPLDTFKSYAKANGKRLQYVT<br>NNTAILSIMPGLYPWPAVCIVFLKSFATEGFDRKTLVADDNSVQVVNSIASRC<br>PRRTVVVTHSGPDVMPWATNPVSAIVA AHYPGQESGNSILDV LIGKVNPS<br>GKLPYTIAKKEEDYNGKITNITGSA AEDSSNWQSEFSEGLFIDYRHFENKGLE<br>PLYEFGYGLSYTTFKLSSTLVVSSANKISARASPSNATLTLGGNPHLWETVIK<br>CHVEVSNTGRVAGATVIQLYASLPKNNIPANSPVRMLRGFEKVYLDPEAK<br>RVSFALRRRDL SYWDVTIQDWMV PKGGIKLSVGFSSKDLRSSTTVQLVK |

**Table S5.** HR-MS data of compounds in this study.

| Com. | Structure                                                                           | Ion Formula                                                   | Meas. $m/z$                                  | Calc. $m/z$                                  | Err (ppm) |
|------|-------------------------------------------------------------------------------------|---------------------------------------------------------------|----------------------------------------------|----------------------------------------------|-----------|
| 1    | 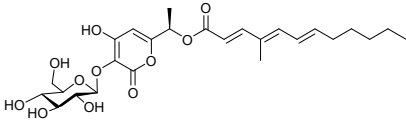   | C <sub>26</sub> H <sub>36</sub> NaO <sub>11</sub>             | [M+Na] <sup>+</sup> 547.2158                 | [M+Na] <sup>+</sup> 547.2150                 | -1.4      |
| 2    |    | C <sub>13</sub> H <sub>20</sub> NaO <sub>2</sub>              | [M+Na] <sup>+</sup> 231.1357                 | [M+Na] <sup>+</sup> 231.1356                 | -0.8      |
| 3    |    | C <sub>13</sub> H <sub>21</sub> O <sub>3</sub>                | [M+H] <sup>+</sup> 225.1487                  | [M+H] <sup>+</sup> 225.1485                  | -0.9      |
| 4    |    | C <sub>13</sub> H <sub>21</sub> O <sub>3</sub>                | [M+H] <sup>+</sup> 225.1486                  | [M+H] <sup>+</sup> 225.1485                  | -0.2      |
| 5    |    | C <sub>13</sub> H <sub>21</sub> O <sub>3</sub>                | [M+H] <sup>+</sup> 225.1487                  | [M+H] <sup>+</sup> 225.1485                  | -0.6      |
| 6    |    | C <sub>13</sub> H <sub>19</sub> O <sub>2</sub>                | [M+H-H <sub>2</sub> O] <sup>+</sup> 207.1380 | [M+H-H <sub>2</sub> O] <sup>+</sup> 207.1380 | -0.3      |
| 7    |    | C <sub>20</sub> H <sub>25</sub> O <sub>4</sub>                | [M-H] <sup>-</sup> 329.1773                  | [M-H] <sup>-</sup> 329.1758                  | -4.4      |
| 8    |   | C <sub>26</sub> H <sub>37</sub> O <sub>10</sub>               | [M+H] <sup>+</sup> 509.2383                  | [M+H] <sup>+</sup> 509.2381                  | -0.4      |
| 9    |  | C <sub>32</sub> H <sub>45</sub> O <sub>16</sub>               | [M-H] <sup>-</sup> 685.2685                  | [M-H] <sup>-</sup> 685.2713                  | 4.0       |
| 3S   |  | C <sub>23</sub> H <sub>26</sub> F <sub>3</sub> O <sub>5</sub> | [M-H] <sup>-</sup> 439.1744                  | [M-H] <sup>-</sup> 439.1738                  | -1.4      |
| 3R   |  | C <sub>23</sub> H <sub>26</sub> F <sub>3</sub> O <sub>5</sub> | [M-H] <sup>-</sup> 439.1724                  | [M-H] <sup>-</sup> 439.1738                  | 3.2       |
| 5S   |  | C <sub>23</sub> H <sub>26</sub> F <sub>3</sub> O <sub>5</sub> | [M-H] <sup>-</sup> 439.1739                  | [M-H] <sup>-</sup> 439.1738                  | -0.2      |
| 5R   |  | C <sub>23</sub> H <sub>26</sub> F <sub>3</sub> O <sub>5</sub> | [M-H] <sup>-</sup> 439.1726                  | [M-H] <sup>-</sup> 439.1738                  | 2.7       |

**Table S6.** NMR data of compound **1** in DMSO-*d*<sub>6</sub>.

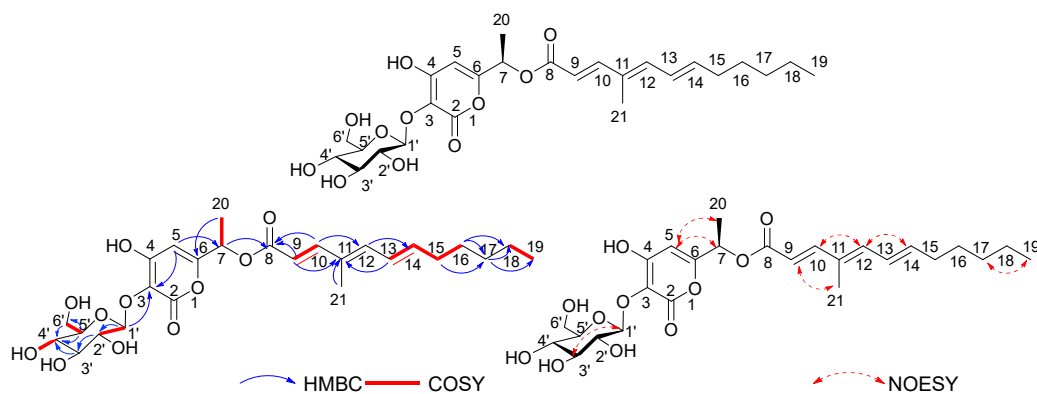

(400 MHz for <sup>1</sup>H NMR, 100 MHz for <sup>13</sup>C NMR)

| No.   | $\delta_H$ , (mult, <i>J</i> in Hz) | $\delta_C$ , type     | HMBC                  | COSY     |
|-------|-------------------------------------|-----------------------|-----------------------|----------|
| 2     |                                     | 157.9, C              |                       |          |
| 3     |                                     | 122.8, C              |                       |          |
| 4     |                                     | 160.5, C              |                       |          |
| 5     | 6.23, s                             | 101.2, CH             | C3, C7                |          |
| 6     |                                     | 159.4, C              |                       |          |
| 7     | 5.58, q (6.62)                      | 67.9, CH              | C5, C8, C20           | H20      |
| 8     |                                     | 165.8, C              |                       |          |
| 9     | 5.93, d, (15.5)                     | 115.6, CH             | C8, C10, C11          | H10      |
| 10    | 7.34, d, (15.5)                     | 150.6, CH             | C8, C9, C11, C12, C21 | H9       |
| 11    |                                     | 131.5, C              |                       |          |
| 12    | 6.56, d, (11.3)                     | 140.4, CH             | C10, C14, C21         |          |
| 13    | 6.48, m                             | 127.1, CH             | C11, C15              | H14      |
| 14    | 6.03, m                             | 142.0, CH             | C12, C15, C16         | H13, H15 |
| 15    | 2.17, q (7.2)                       | 33.1, CH <sub>2</sub> | C13, C14, C16, C17    | H14, H16 |
| 16    | 1.39, m                             | 28.7, CH <sub>2</sub> | C14, C17, C18         | H15      |
| 17    | 1.26, m                             | 31.3, CH <sub>2</sub> | C15, C18, C17         |          |
| 18    | 1.27, m                             | 22.4, CH <sub>2</sub> | C17, C19              | H19      |
| 19    | 0.86, t, (6.8)                      | 14.3, CH <sub>3</sub> | C17, C18              | H18      |
| 20    | 1.45, m                             | 18.4, CH <sub>3</sub> | C6, C7                | H7       |
| 21    | 1.85, s                             | 12.6, CH <sub>3</sub> | C10, C11, C12         |          |
| 1'    | 4.81, d (7.3)                       | 103.3, CH             | C3, C2'               | H2'      |
| 2'    | 3.24, m                             | 74.0, CH              | C1', C3'              | H1'      |
| 3'    | 3.20, m                             | 76.8, CH              | C2', C4'              |          |
| 4'    | 3.15, m                             | 70.0, CH              |                       | OH4'     |
| 5'    | 3.12, m                             | 77.7, CH              | C4', C6'              | H6'      |
| 6'    | 3.44, 3.61 m                        | 61.2, CH <sub>2</sub> | C4', C5'              | H5'      |
| 4'-OH | 4.94, s                             |                       |                       | H4'      |

**Table S7.** NMR data of compound **2** in CDCl<sub>3</sub>.

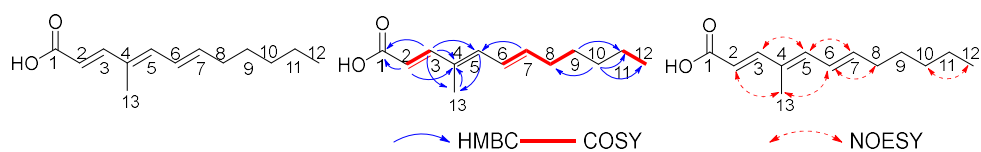

(400 MHz for <sup>1</sup>H NMR, 100 MHz for <sup>13</sup>C NMR)

| No. | $\delta_H$ , mult ( <i>J</i> in Hz) | $\delta_C$ , type     | HMBC                | COSY   |
|-----|-------------------------------------|-----------------------|---------------------|--------|
| 1   |                                     | 171.3, C              |                     |        |
| 2   | 5.84, d (15.5)                      | 114.9, CH             | C1, C4              | H3     |
| 3   | 7.42, d (15.5)                      | 151.8, CH             | C1, C2, C4, C5, C13 | H2     |
| 4   |                                     | 131.3, C              |                     |        |
| 5   | 6.39, m                             | 140.3, CH             | C3, C4, C13         |        |
| 6   | 6.40, m                             | 126.6, CH             | C7                  | H7     |
| 7   | 5.99, m                             | 141.9, CH             | C5, C8              | H6, H8 |
| 8   | 2.18, m                             | 33.5, CH <sub>2</sub> | C6, C7, C9, C10     | H7, H9 |
| 9   | 1.43, m                             | 28.9, CH <sub>2</sub> | C7, C8, C11         | H8     |
| 10  | 1.29, m                             | 31.6, CH <sub>2</sub> | C11, C12            |        |
| 11  | 1.31, m                             | 22.7, CH <sub>2</sub> | C10                 | H12    |
| 12  | 0.89, t (6.9)                       | 14.2, CH <sub>3</sub> | C10, C11            | H11    |
| 13  | 1.89, s                             | 12.5, CH <sub>3</sub> | C3, C4, C5          |        |



**Table S8.** NMR data of compound **3** in DMSO-*d*<sub>6</sub>.

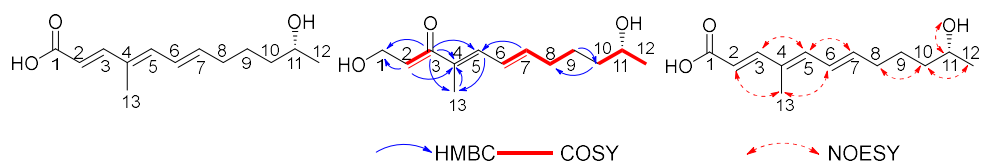

(400 MHz for <sup>1</sup>H NMR, 100 MHz for <sup>13</sup>C NMR)

| No. | $\delta_H$ , mult ( <i>J</i> in Hz) | $\delta_C$ , type     | HMBC                | COSY     |
|-----|-------------------------------------|-----------------------|---------------------|----------|
| 1   |                                     | 167.8, C              |                     |          |
| 2   | 5.79, d (15.5)                      | 117.1, CH             | C1, C4              | H3       |
| 3   | 7.22, d (15.5)                      | 148.4, CH             | C1, C2, C4, C5, C13 | H2       |
| 4   |                                     | 131.0, C              |                     |          |
| 5   | 6.46, m                             | 138.4, CH             | C3, C13             |          |
| 6   | 6.44, m                             | 126.6, CH             | C7                  | H7       |
| 7   | 5.99, m                             | 140.5, CH             | C5, C8, C9          | H6, H8   |
| 8   | 2.16, m                             | 32.7, CH <sub>2</sub> | C6, C7, C9          | H7, H9   |
| 9   | 1.46, m                             | 24.9, CH <sub>2</sub> | C7, C10             | H8       |
| 10  | 1.31, m                             | 38.9, CH <sub>2</sub> | C8, C9, C11         | H11      |
| 11  | 3.58, m                             | 65.6, CH              |                     | H10, H12 |
| 12  | 1.03, d (6.2)                       | 23.6, CH <sub>3</sub> | C10, C11            | H11      |
| 13  | 1.83, s                             | 12.2, CH <sub>3</sub> | C3, C4, C5          |          |

**Table S9.** NMR data of compound **4** in DMSO-*d*<sub>6</sub>.

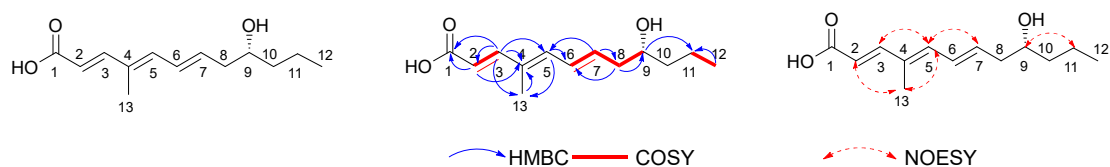

(400 MHz for <sup>1</sup>H NMR, 100 MHz for <sup>13</sup>C NMR)

| No. | $\delta_H$ , mult ( <i>J</i> in Hz) | $\delta_C$ , type     | HMBC                | COSY   |
|-----|-------------------------------------|-----------------------|---------------------|--------|
| 1   |                                     | 167.9, C              |                     |        |
| 2   | 5.79, d (15.5)                      | 117.3, CH             | C1, C4              | H3     |
| 3   | 7.22, d (15.5)                      | 148.3, CH             | C1, C2, C4, C5, C13 | H2     |
| 4   |                                     | 131.1, C              |                     |        |
| 5   | 6.48, m                             | 138.4, CH             | C3, C6, C7, C13     |        |
| 6   | 6.46, m                             | 127.9, CH             | C5, C8              | H7     |
| 7   | 6.02, m                             | 137.7, CH             | C5, C8              | H6, H8 |
| 8   | 2.23, m                             | 41.2, CH <sub>2</sub> | C6, C7, C9          | H7, H9 |
| 9   | 3.52, m                             | 69.3, CH              | C11                 | H8     |
| 10  | 3.17, m                             | 48.6, CH <sub>2</sub> | C8, C9, C11         |        |
| 11  | 1.39, m                             | 18.4, CH <sub>2</sub> | C9                  | H12    |
| 12  | 0.86, m                             | 14.0, CH <sub>3</sub> | C11                 | H11    |
| 13  | 1.83, s                             | 12.2, CH <sub>3</sub> | C3, C4, C5          |        |

**Table S10.** NMR data of compound **5** in DMSO-*d*<sub>6</sub>.

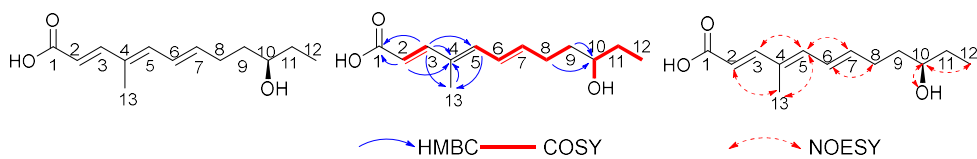

(400 MHz for <sup>1</sup>H NMR, 100 MHz for <sup>13</sup>C NMR)

| No.   | $\delta_H$ , mult ( <i>J</i> in Hz) | $\delta_C$ , type     | HMBC                | COSY      |
|-------|-------------------------------------|-----------------------|---------------------|-----------|
| 1     |                                     | 167.8, C              |                     |           |
| 2     | 5.78, d (15.5)                      | 117.0, CH             | C1, C4              | H3        |
| 3     | 7.21, d (15.5)                      | 148.5, CH             | C1, C2, C4, C5, C13 | H2        |
| 4     |                                     | 131.0, C              |                     |           |
| 5     | 6.48, m                             | 138.6, CH             | C3, C4, C13         | H6        |
| 6     | 6.45, m                             | 126.5, CH             | C7                  | H5, H7    |
| 7     | 6.00, m                             | 140.8, CH             | C5, C8, C9          | H6, H8    |
| 8     | 1.45, m                             | 36.0, CH <sub>2</sub> | C7, C9, C10         | H7, H9    |
| 9     | 2.19, m                             | 29.1, CH <sub>2</sub> | C7, C8, C10         | H8        |
| 10    | 3.35, s                             | 70.4, CH              |                     | H11, OH10 |
| 11    | 1.32, m                             | 29.8, CH <sub>2</sub> | C10, C12            | H10, H12  |
| 12    | 0.85, t (7.4)                       | 10.0, CH <sub>3</sub> | C10, C11            | H11       |
| 13    | 1.83, s                             | 12.2, CH <sub>3</sub> | C3, C4, C5          |           |
| 10-OH | 4.37, s                             |                       |                     | H10       |

**Table S11.** NMR data of compound **6** in DMSO-*d*<sub>6</sub>.

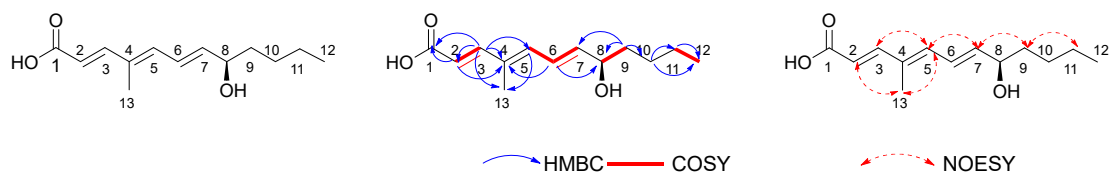

(400 MHz for <sup>1</sup>H NMR, 100 MHz for <sup>13</sup>C NMR)

| No. | $\delta_H$ , mult ( <i>J</i> in Hz) | $\delta_C$ , type     | HMBC                | COSY   |
|-----|-------------------------------------|-----------------------|---------------------|--------|
| 1   |                                     | 168.4, C              |                     |        |
| 2   | 5.82, d (15.5)                      | 118.3, CH             | C1, C4              | H3     |
| 3   | 7.22, d (15.5)                      | 148.5, CH             | C1, C2, C4, C5, C13 | H2     |
| 4   |                                     | 132.7, C              |                     |        |
| 5   | 6.49, m                             | 138.3, CH             | C3, C7, C13         | H6     |
| 6   | 6.57, m                             | 124.9, CH             | C4                  | H5, H7 |
| 7   | 5.97, dd (5.9, 14.4)                | 144.0, CH             | C5, C8, C9          | H6     |
| 8   | 4.07, q (6.1)                       | 70.8, CH              | C7, C9, C10         | H9     |
| 9   | 1.42, m                             | 37.3, CH <sub>2</sub> | C7, C8, C10         | H8     |
| 10  | 1.36, m                             | 27.7, CH <sub>2</sub> | C8, C9, C11, C12    |        |
| 11  | 1.28, m                             | 22.6, CH <sub>2</sub> | C10, C12            | H12    |
| 12  | 0.86, t (6.5)                       | 14.4, CH <sub>3</sub> | C10, C11            | H11    |
| 13  | 1.85, m                             | 12.7, CH <sub>3</sub> | C3, C4, C5          |        |

**Table S12.** The  $^1\text{H}$  NMR spectroscopic data of compounds **3S** (*R*-MTPA derivative) and **3R** (*S*-MTPA derivative) in  $\text{DMSO-}d_6$ .

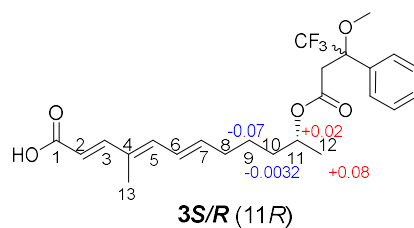

(400 MHz for  $^1\text{H}$  NMR)

| No. | <b>3S</b> | <b>3R</b> | $\Delta\delta^{S-R}$ |
|-----|-----------|-----------|----------------------|
| 1   |           |           |                      |
| 2   | 5.7976    | 5.7951    | 0.0025               |
| 3   | 7.2209    | 7.2153    | 0.0056               |
| 4   |           |           |                      |
| 5   | 6.4411    | 6.4713    | -0.0302              |
| 6   | 6.4062    | 6.4567    | -0.0505              |
| 7   | 5.8741    | 5.9638    | -0.0897              |
| 8   | 2.1769    | 2.1803    | -0.0034              |
| 9   | 1.5419    | 1.6107    | -0.0688              |
| 10  | 1.4475    | 1.4507    | -0.0032              |
| 11  | 3.4939    | 3.4715    | 0.0224               |
| 12  | 1.2998    | 1.2155    | 0.0843               |
| 13  | 1.8274    | 1.8266    | 0.0008               |

**Table S13.** The  $^1\text{H}$  NMR spectroscopic data of compounds **5S** (*R*-MTPA derivative) and **5R** (*S*-MTPA derivative) in  $\text{DMSO-}d_6$ .

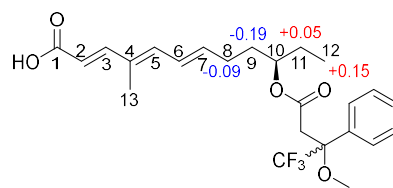

**5S/R** (10*R*)

(400 MHz for  $^1\text{H}$  NMR)

| No. | <b>5S</b> | <b>5R</b> | $\Delta\delta^{S-R}$ |
|-----|-----------|-----------|----------------------|
| 1   |           |           |                      |
| 2   | 5.8038    | 5.8062    | -0.0024              |
| 3   | 7.2048    | 7.2194    | -0.0146              |
| 4   |           |           |                      |
| 5   | 6.4380    | 6.4833    | -0.0453              |
| 6   | 6.4098    | 6.4585    | -0.0487              |
| 7   | 5.8887    | 5.9800    | -0.0913              |
| 8   | 1.6806    | 1.7658    | -0.0852              |
| 9   | 2.0133    | 2.2034    | -0.1901              |
| 10  | 3.5038    | 3.4978    | 0.0060               |
| 11  | 1.6277    | 1.5760    | 0.0517               |
| 12  | 0.8866    | 0.7380    | 0.1486               |
| 13  | 1.8237    | 1.8321    | -0.0084              |

**Table S14.** NMR data of compound **7** in DMSO-*d*<sub>6</sub>.

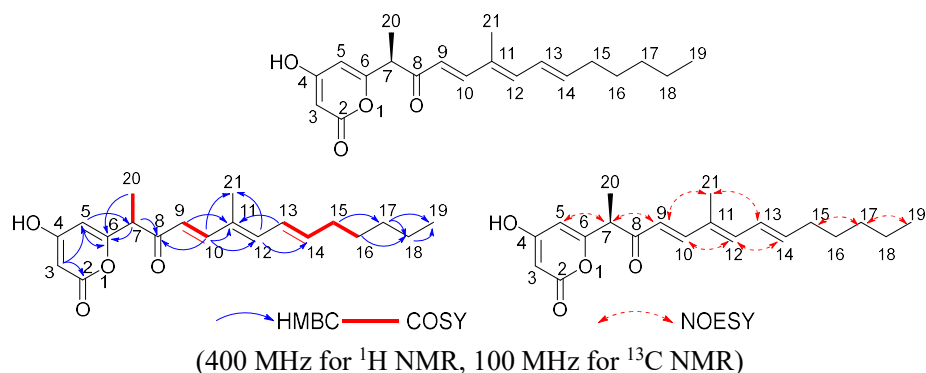

| No. | $\delta_H$ , (mult, <i>J</i> in Hz) | $\delta_C$ , type     | HMBC                  | COSY     |
|-----|-------------------------------------|-----------------------|-----------------------|----------|
| 2   |                                     | 163.4, C              |                       |          |
| 3   | 5.25, d (2.1)                       | 89.0, CH              | C2, C4, C5            |          |
| 4   |                                     | 170.2, C              |                       |          |
| 5   | 6.11, d (2.1)                       | 100.9, CH             | C3, C4, C6, C7        |          |
| 6   |                                     | 164.5, C              |                       |          |
| 7   | 4.12, q, (7.0)                      | 48.0, CH              | C5, C6, C8, C20       | H20      |
| 8   |                                     | 195.9, C              |                       |          |
| 9   | 6.31, d, (15.6)                     | 122.4, CH             | C8, C11               | H10      |
| 10  | 7.35, d, (15.6)                     | 148.3, CH             | C8, C9, C11, C12, C21 | H9       |
| 11  |                                     | 131.5, C              |                       |          |
| 12  | 6.61, d, (11.3)                     | 141.1, CH             | C10, C14, C21         |          |
| 13  | 6.50, m                             | 126.8, CH             | C11, C15              | H14      |
| 14  | 6.05, m                             | 141.8, CH             | C12, C15, C16         | H13, H15 |
| 15  | 2.17, q, (7.2)                      | 32.6, CH <sub>2</sub> | C13, C14, C16, C17    | H14, H16 |
| 16  | 1.40, m                             | 28.2, CH <sub>2</sub> | C14, C15, C18         | H15      |
| 17  | 1.26, m                             | 30.9, CH <sub>2</sub> | C18, C19              |          |
| 18  | 1.28, m                             | 21.9, CH <sub>2</sub> | C16, C17              |          |
| 19  | 0.86, t, (6.8)                      | 13.9, CH <sub>3</sub> | C17, C18              |          |
| 20  | 1.29, m                             | 13.9, CH <sub>3</sub> | C6, C7, C8            | H7       |
| 21  | 1.84, s                             | 12.1, CH <sub>3</sub> | C10, C11, C12         |          |

**Table S15.** Energy (298.15 K) analysis for **7R** and **7S**.

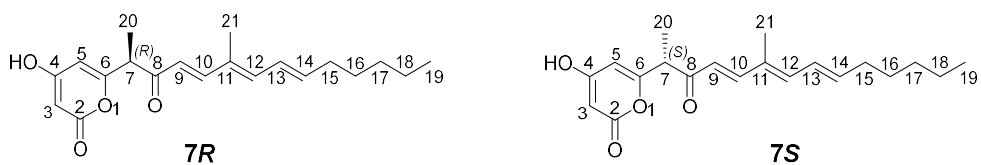

| Conformers | G (Hartree)   | Boltzmann Distribution (%) |
|------------|---------------|----------------------------|
| 7R1        | -1078.5439941 | 24.00                      |
| 7R2        | -1078.5440875 | 26.49                      |
| 7R3        | -1078.5409769 | 0.98                       |
| 7R4        | -1078.5416929 | 2.09                       |
| 7R5        | -1078.5431765 | 10.09                      |
| 7R6        | -1078.543357  | 12.21                      |
| 7R7        | -1078.5431769 | 10.09                      |
| 7R8        | -1078.543208  | 10.43                      |
| 7R9        | -1078.541643  | 1.98                       |
| 7R10       | -1078.5414591 | 1.63                       |
| 7S1        | -1078.543994  | 24.38                      |
| 7S2        | -1078.5440875 | 26.92                      |
| 7S3        | -1078.5410144 | 1.04                       |
| 7S4        | -1078.541693  | 2.13                       |
| 7S5        | -1078.5431765 | 10.25                      |
| 7S6        | -1078.543357  | 12.41                      |
| 7S7        | -1078.5431769 | 10.25                      |
| 7S8        | -1078.543208  | 10.60                      |
| 7S9        | -1078.541643  | 2.02                       |



**Table S16.** NMR data of compound **8** in DMSO-*d*<sub>6</sub>.

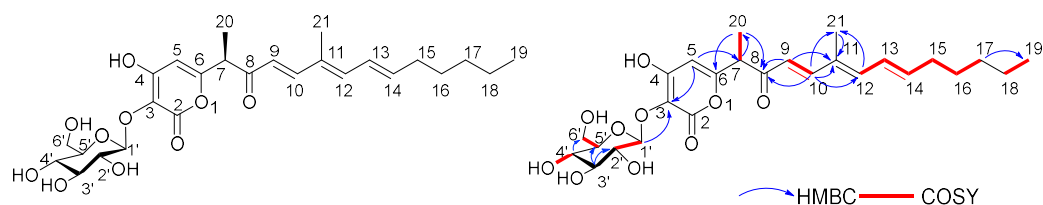

(400 MHz for <sup>1</sup>H NMR, 100 MHz for <sup>13</sup>C NMR)

| No.   | $\delta_H$ , (mult, <i>J</i> in Hz) | $\delta_C$ , type     | HMBC               | COSY     |
|-------|-------------------------------------|-----------------------|--------------------|----------|
| 2     |                                     | 159.3, C              |                    |          |
| 3     |                                     | 122.0, C              |                    |          |
| 4     |                                     | 160.7, C              |                    |          |
| 5     | 6.15, m                             | 102.0, CH             | C3, C6, C7         |          |
| 6     |                                     | 159.8, C              |                    |          |
| 7     | 4.08, m                             | 47.7, CH              | C5, C6, C8, C20    | H20      |
| 8     |                                     | 196.2, C              |                    |          |
| 9     | 6.30, d, (15.5)                     | 122.5, CH             | C8, C11            | H10      |
| 10    | 7.34, d, (15.5)                     | 148.5, CH             | C8, C11, C12, C21  | H9       |
| 11    |                                     | 131.6, C              |                    |          |
| 12    | 6.60, d, (11.3)                     | 141.2, CH             | C10, C14, C21      | H13      |
| 13    | 6.48, m                             | 126.9, CH             | C15                | H12, H14 |
| 14    | 6.05, m                             | 142.0, CH             | C12, C15, C16      | H13, H15 |
| 15    | 2.17, m                             | 32.7, CH <sub>2</sub> | C13, C14, C16, C17 | H14, H16 |
| 16    | 1.38, m                             | 28.2, CH <sub>2</sub> | C14, C17, C18      | H15, H17 |
| 17    | 1.26, m                             | 30.9, CH <sub>2</sub> | C15, C16, C18, C19 | H16      |
| 18    | 1.27, m                             | 22.0, CH <sub>2</sub> | C19                | H19      |
| 19    | 0.85, t, (6.7)                      | 14.1, CH <sub>3</sub> | C17, C18           | H18      |
| 20    | 1.28, m                             | 14.0, CH <sub>3</sub> | C6, C7, C8         | H7       |
| 21    | 1.83, s                             | 12.2, CH <sub>3</sub> | C10, C11, C12      |          |
| 1'    | 4.74, m                             | 103.1, CH             | C3                 | H2'      |
| 2'    | 3.22, m                             | 73.7, CH              | C1', C3'           | H1'      |
| 3'    | 3.20, m                             | 76.3, CH              | C4'                |          |
| 4'    | 3.18, m                             | 69.6, CH              | C3'                | OH4'     |
| 5'    | 3.11, m                             | 77.2, CH              | C4'                | H6'      |
| 6'    | 3.44, 3.60, m                       | 60.7, CH <sub>2</sub> | C4', C5'           | H5'      |
| 4'-OH | 4.96, s                             |                       |                    | H4'      |

**Table S17.** NMR data of compound **9** in DMSO-*d*<sub>6</sub>.

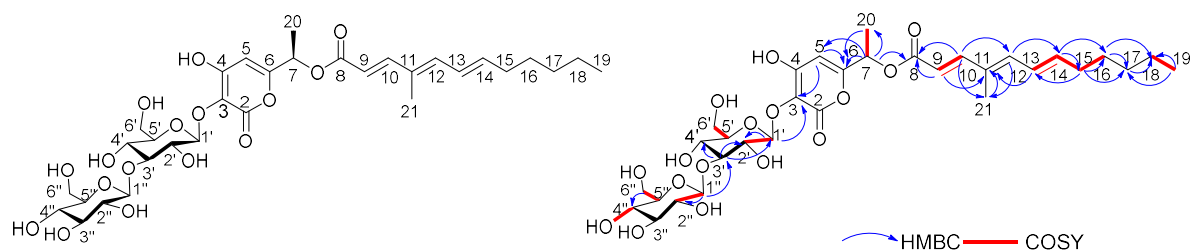

(400 MHz for <sup>1</sup>H NMR, 100 MHz for <sup>13</sup>C NMR)

| No.    | $\delta_H$ , (mult, <i>J</i> in Hz) | $\delta_C$ , type     | HMBC                  | COSY     |
|--------|-------------------------------------|-----------------------|-----------------------|----------|
| 2      |                                     | 156.4, C              |                       |          |
| 3      |                                     | 123.8, C              |                       |          |
| 4      |                                     | 162.2, C              |                       |          |
| 5      | 5.69, s                             | 106.9, CH             | C3, C6, C7            |          |
| 6      |                                     | 160.8, C              |                       |          |
| 7      | 5.42, q (6.7)                       | 68.1, CH              | C5, C6, C8, C20       | H20      |
| 8      |                                     | 165.5, C              |                       |          |
| 9      | 5.92, d, (15.5)                     | 115.5, CH             | C8, C11               | H10      |
| 10     | 7.32, d, (15.5)                     | 149.8, CH             | C8, C9, C11, C12, C21 | H9       |
| 11     |                                     | 131.1, C              |                       |          |
| 12     | 6.56, m                             | 139.7, CH             | C10, C14, C21         |          |
| 13     | 6.47, m                             | 126.7, CH             | C15                   | H14      |
| 14     | 6.03, m                             | 141.4, CH             | C12, C15, C16         | H13, H15 |
| 15     | 2.17, q (7.2)                       | 32.6, CH <sub>2</sub> | C13, C14, C16, C17    | H14, H16 |
| 16     | 1.39, m                             | 28.2, CH <sub>2</sub> | C14, C15, C17, C18    | H15      |
| 17     | 1.26, m                             | 30.9, CH <sub>2</sub> | C15, C16, C18, C19    |          |
| 18     | 1.27, m                             | 21.9, CH <sub>2</sub> | C16, C17, C19         | H19      |
| 19     | 0.86, t, (6.8)                      | 13.9, CH <sub>3</sub> | C17, C18              | H18      |
| 20     | 1.41, m                             | 18.2, CH <sub>3</sub> | C6, C7                | H7       |
| 21     | 1.85, s                             | 12.1, CH <sub>3</sub> | C10, C11, C12         |          |
| 1'     | 4.22, d (7.7)                       | 107.6, CH             | C3, C2'               | H2'      |
| 2'     | 3.26, m                             | 73.1, CH              | C1', C3'              | H1'      |
| 3'     | 3.39, m                             | 86.7, CH              | C1', C2', C4'         |          |
| 4'     | 3.23, m                             | 68.0, CH              | C3'                   |          |
| 5'     | 3.17, m                             | 76.4, CH              |                       | H6'      |
| 6'     | 3.48, 3.67 m                        | 60.7, CH <sub>2</sub> |                       | H5'      |
| 1''    | 4.40, d (7.7)                       | 104.2, CH             | C3', C2''             | H2''     |
| 2''    | 3.03, m                             | 74.4, CH              | C1''                  | H1''     |
| 3''    | 3.17, m                             | 76.8, CH              |                       |          |
| 4''    | 3.04, m                             | 70.2, CH              | C6''                  | OH4''    |
| 5''    | 3.17, m                             | 76.9, CH              |                       | H6''     |
| 6''    | 3.48, 3.67 m                        | 61.2, CH <sub>2</sub> | C4''                  | H5''     |
| 4''-OH | 4.95, s                             |                       |                       | H4''     |

**Table S18.** NMR data of compound **9** in pyridine-*d*<sub>5</sub>.

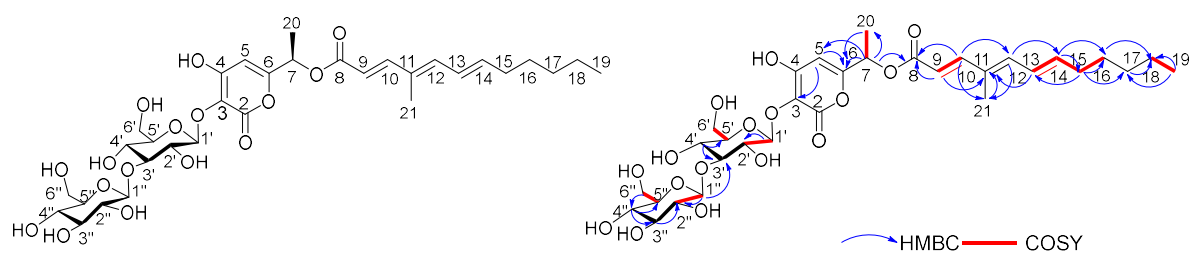

(400 MHz for <sup>1</sup>H NMR, 100 MHz for <sup>13</sup>C NMR)

| No. | $\delta_H$ , (mult, <i>J</i> in Hz) | $\delta_C$ , type     | HMBC             | COSY     |
|-----|-------------------------------------|-----------------------|------------------|----------|
| 2   |                                     | 157.7, C              |                  |          |
| 3   |                                     | 123.4, C              |                  |          |
| 4   |                                     | 162.8, C              |                  |          |
| 5   | 6.54, m                             | 104.6, CH             | C3, C6, C7       |          |
| 6   |                                     | 159.0, C              |                  |          |
| 7   | 5.90, m                             | 68.8, CH              | C5, C6, C8, C20  | H20      |
| 8   |                                     | 166.7, C              |                  |          |
| 9   | 6.06, d, (15.6)                     | 116.5, CH             | C8, C11          | H10      |
| 10  | 7.64, d, (15.6)                     | 151.0, CH             | C8, C12, C21     | H9       |
| 11  |                                     | 132.0, C              |                  |          |
| 12  | 6.46, m                             | 140.7, CH             | C10, C14, C21    |          |
| 13  | 6.51, m                             | 127.5, CH             | C11, C15         | H14      |
| 14  | 6.00, m                             | 142.2, CH             | C12, C15, C16    | H13, H15 |
| 15  | 2.12, q (7.3)                       | 33.9, CH <sub>2</sub> | C13, C14, C16    | H14, H16 |
| 16  | 1.35, m                             | 29.5, CH <sub>2</sub> | C14, C15, C18    | H15      |
| 17  | 1.22, m                             | 32.1, CH <sub>2</sub> | C18, C19         |          |
| 18  | 1.24, m                             | 23.2, CH <sub>2</sub> | C16, C17, C19    | H19      |
| 19  | 0.85, t, (6.6)                      | 14.6, CH <sub>3</sub> | C17, C18         | H18      |
| 20  | 1.52, d (6.7)                       | 18.9, CH <sub>3</sub> | C6, C7           | H7       |
| 21  | 1.86, s                             | 12.8, CH <sub>3</sub> | C10, C11, C12    |          |
| 1'  | 5.60, d (7.3)                       | 103.8, CH             | C2'              | H2'      |
| 2'  | 3.94, m                             | 74.3, CH              | C1'              | H1'      |
| 3'  | 4.19, m                             | 88.5, CH              | C1''             |          |
| 4'  | 4.02, m                             | 69.9, CH              | C3', C5'         |          |
| 5'  | 3.89, m                             | 78.7, CH              | C4'              | H6'      |
| 6'  | 4.37, 4.21 m                        | 62.2, CH <sub>2</sub> |                  | H5'      |
| 1'' | 5.27, d (7.8)                       | 106.3, CH             | C3'', C2''       | H2''     |
| 2'' | 4.05, m                             | 76.2, CH              | C1'', C3''       | H1''     |
| 3'' | 4.24, m                             | 78.7, CH              | C2'', C4''       |          |
| 4'' | 4.18, m                             | 72.1, CH              | C3'', C5'', C6'' |          |
| 5'' | 4.00, m                             | 79.1, CH              | C4''             | H6''     |
| 6'' | 4.55, 4.28, m                       | 63.0, CH <sub>2</sub> | C4''             | H5''     |

### 3. Supplementary Figures

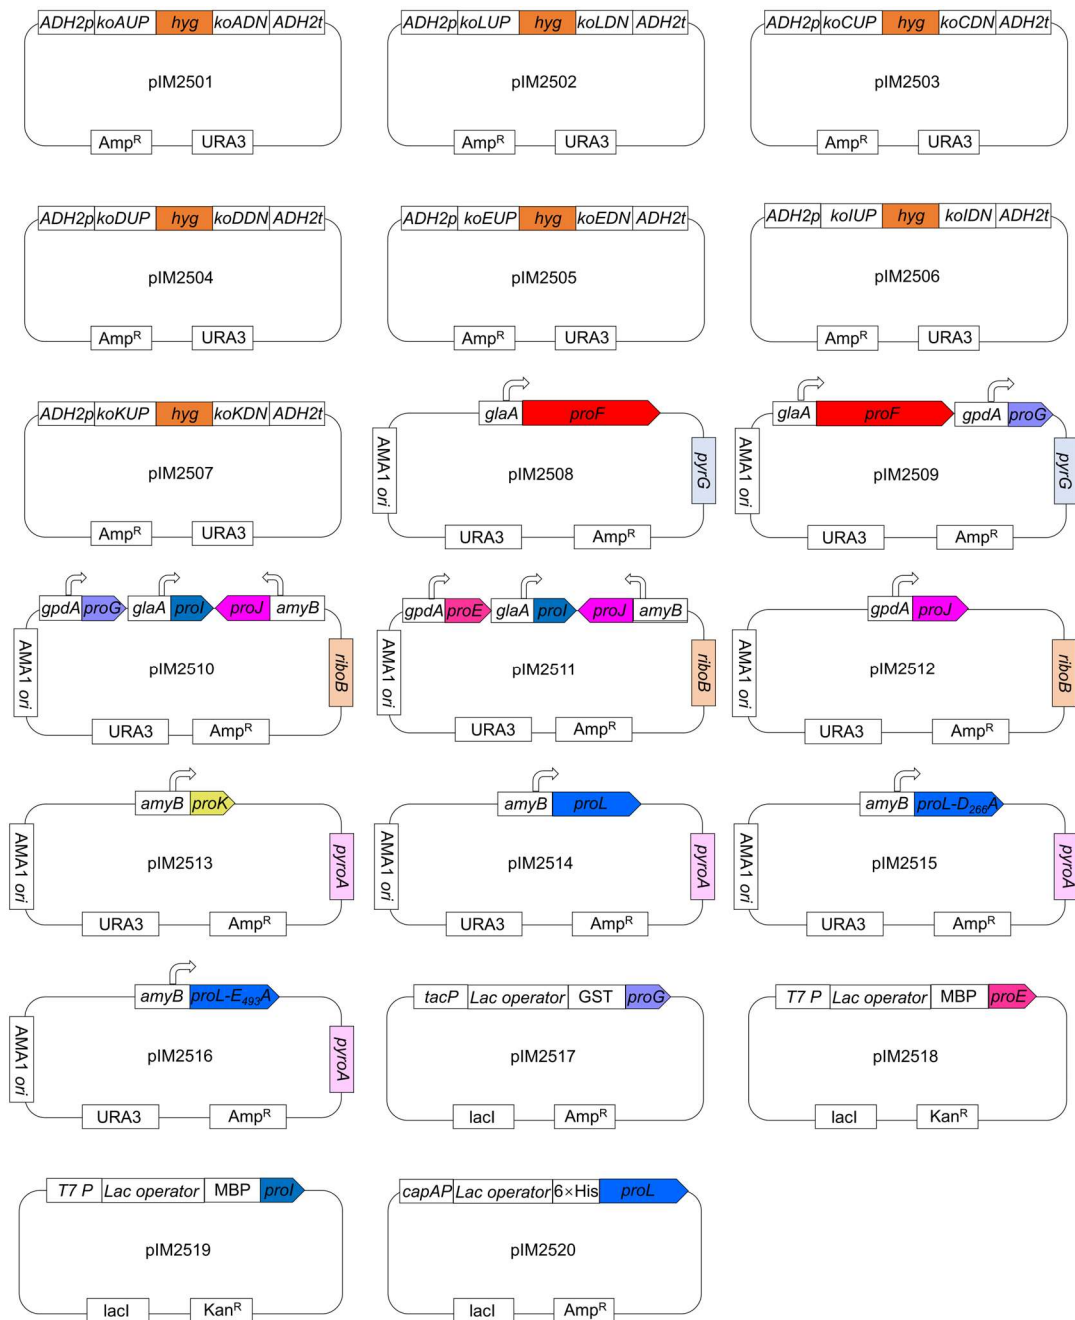

Figure S1. Schematic diagram of plasmids used in this study.

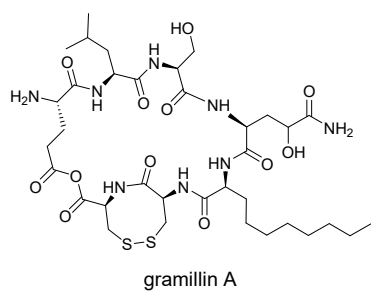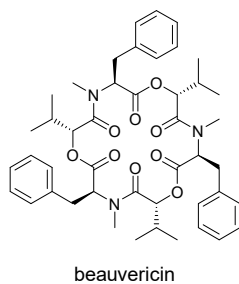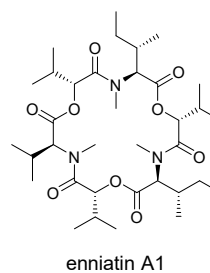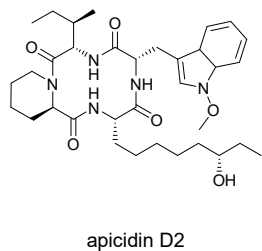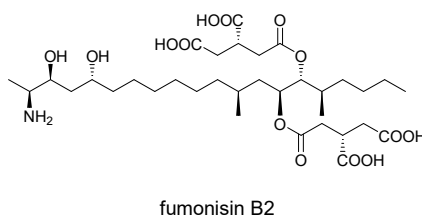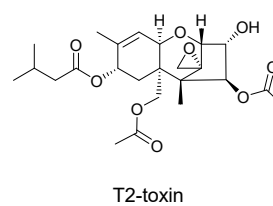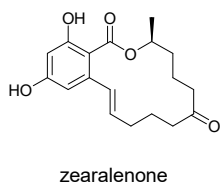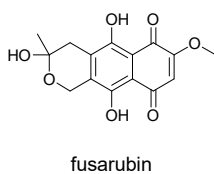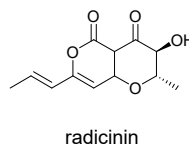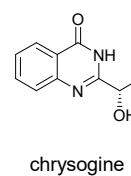

**Figure S2.** The well-known fungal phytotoxins produced by *Fusarium* species.

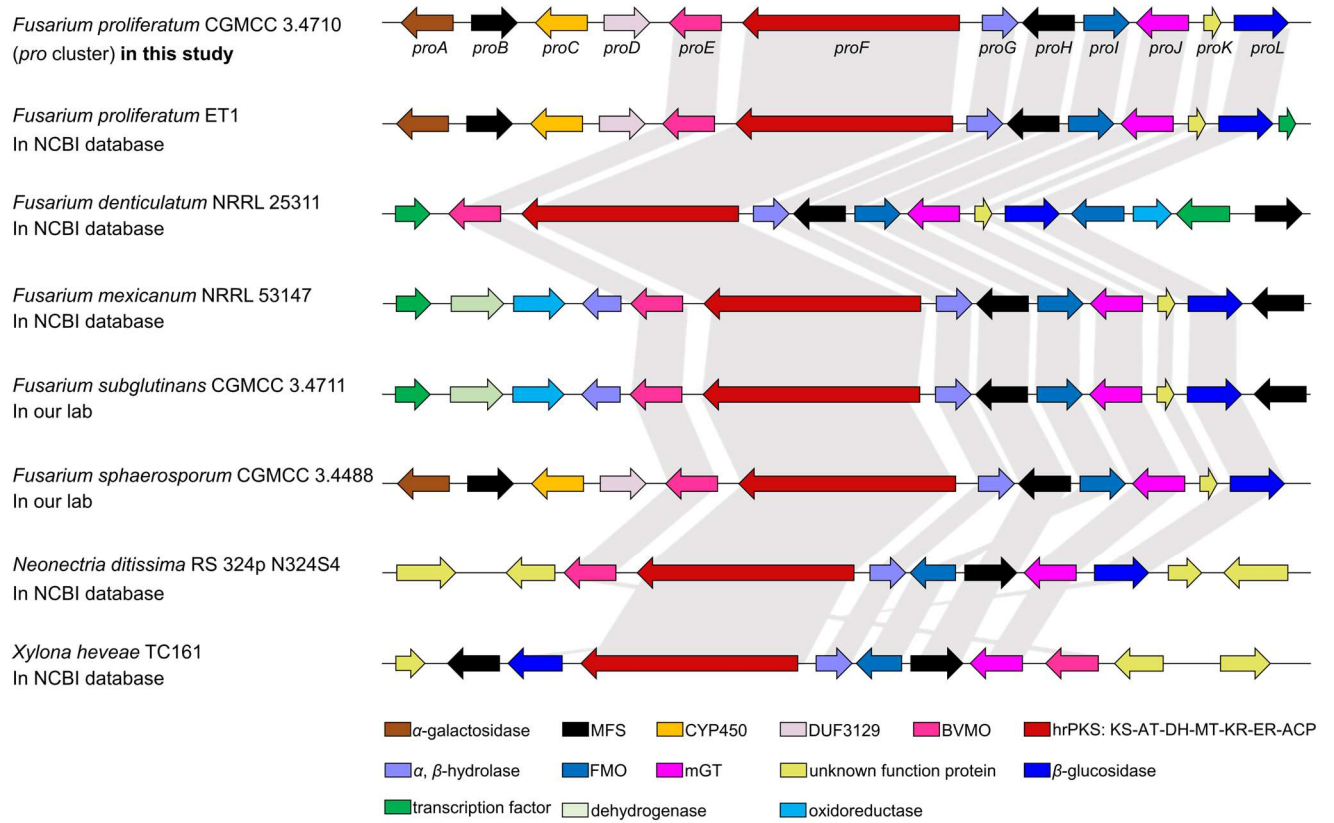

**Figure S3.** The genome-mined homologue gene clusters of PKS16 in public and our lab database.

```

# ProJ Length: 549
# ProJ Number of predicted TMHs: 1
# ProJ Exp number of AAs in TMHs: 23.78525
# ProJ Exp number, first 60 AAs: 4.16467
# ProJ Total prob of N-in: 0.19967
ProJ  TMHMM1.0    outside  1  500
ProJ  TMHMM1.0    TMhelix  501 519
ProJ  TMHMM1.0    inside   520 549

```

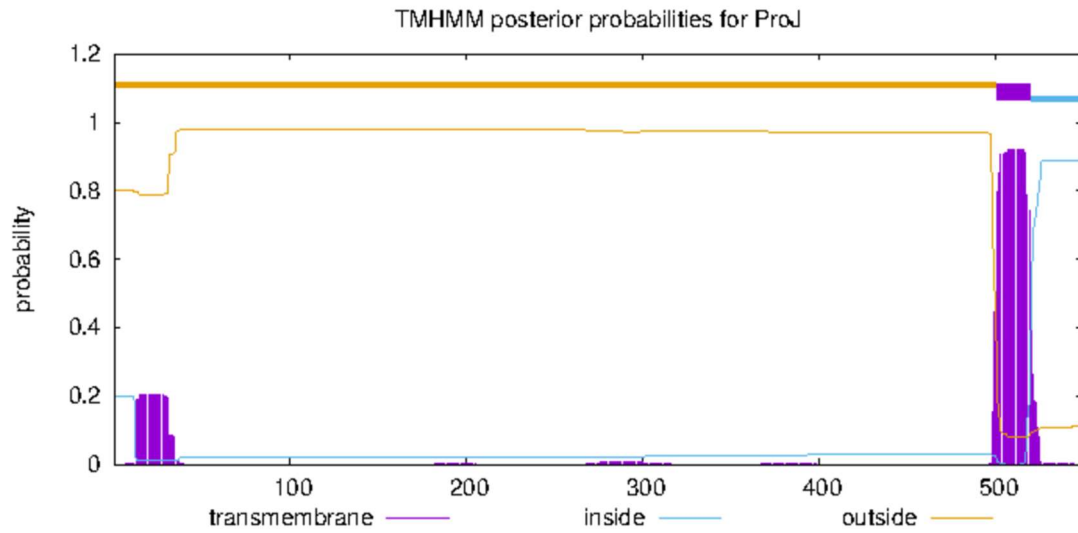

**Figure S4.** The prediction of transmembrane helices of mGT ProJ. ProJ is a membrane-bound protein, a transmembrane sequence was predicted at the *C*-terminal.

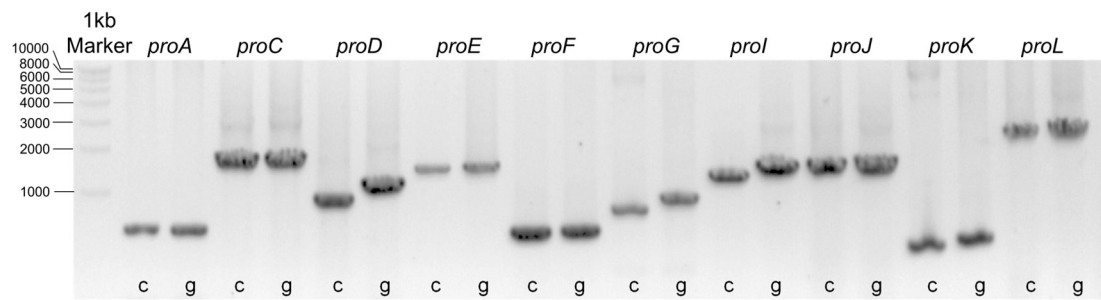

**Figure S5.** The *pro* genes are all under transcription when *F. proliferatum* is incubated on glycerol medium. c, complementary DNA; g, genomic DNA. PCR was conducted utilizing a set of validation primers that were strategically designed to span the regions containing introns.



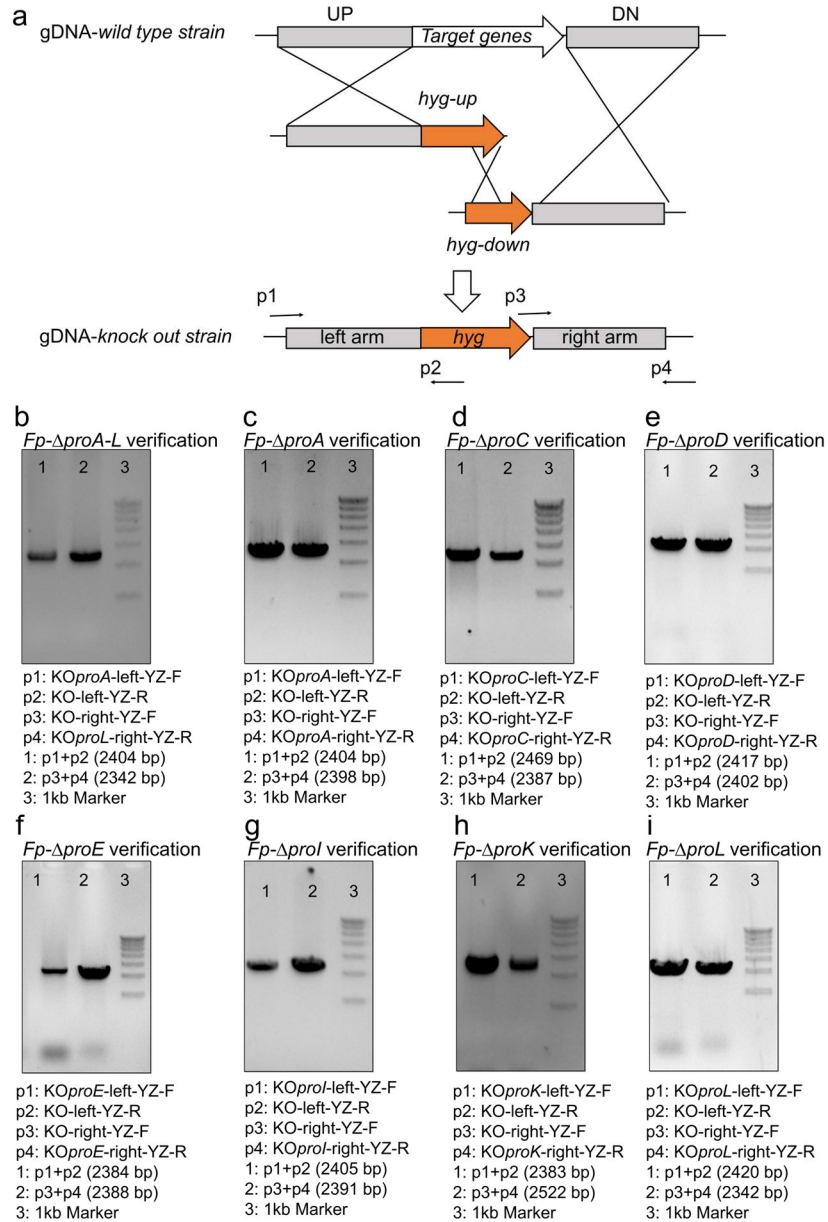

**Figure S6.** PCR verification of knockout mutants of *F. proliferatum* in this study. a Schematic diagram of the constructed knockout mutants. b-i PCR verification of *Fp-ΔproA-L* (b), *Fp-ΔproA* (c), *Fp-ΔproC* (d), *Fp-ΔproD* (e), *Fp-ΔproE* (f), *Fp-ΔproI* (g), *Fp-ΔproK* (h) and *Fp-ΔproL* (i) mutants.

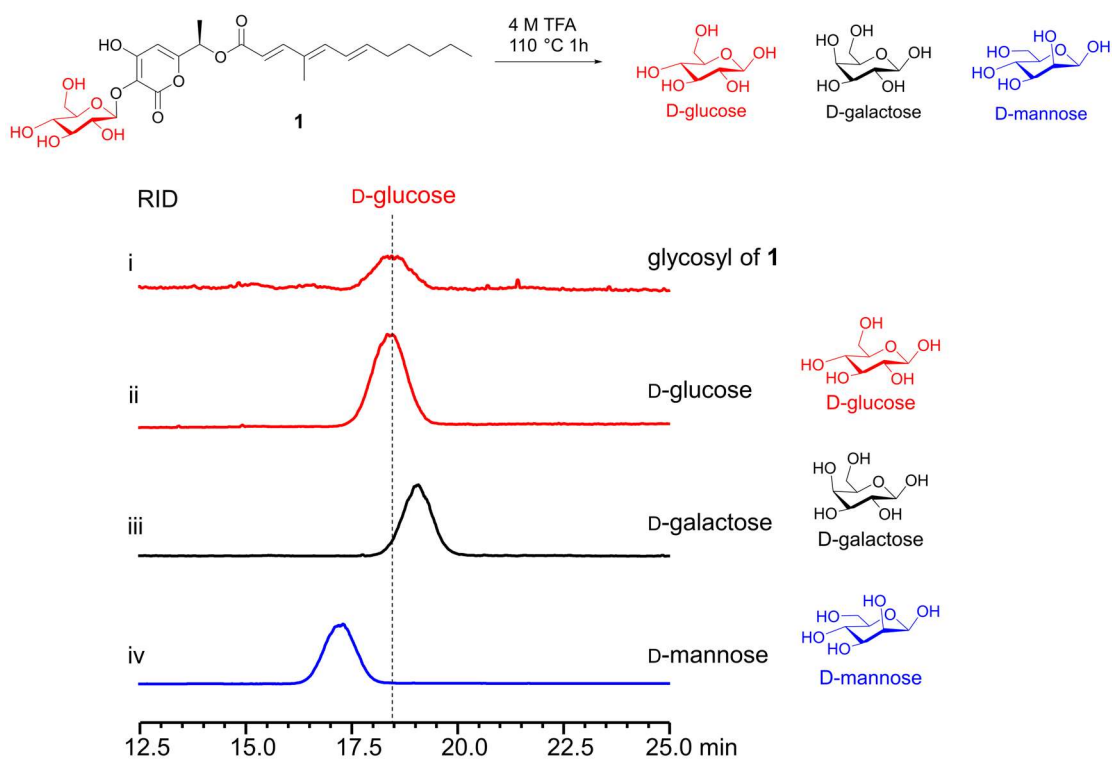

**Figure S7.** HPLC (refractive index detector) analysis of the glycosyl of compound **1**. By comparison with the standards of monosaccharides as well as NMR analysis (Table S6 and Figures S36–42), the glycan moiety of **1** is confirmed to be D-glucose.

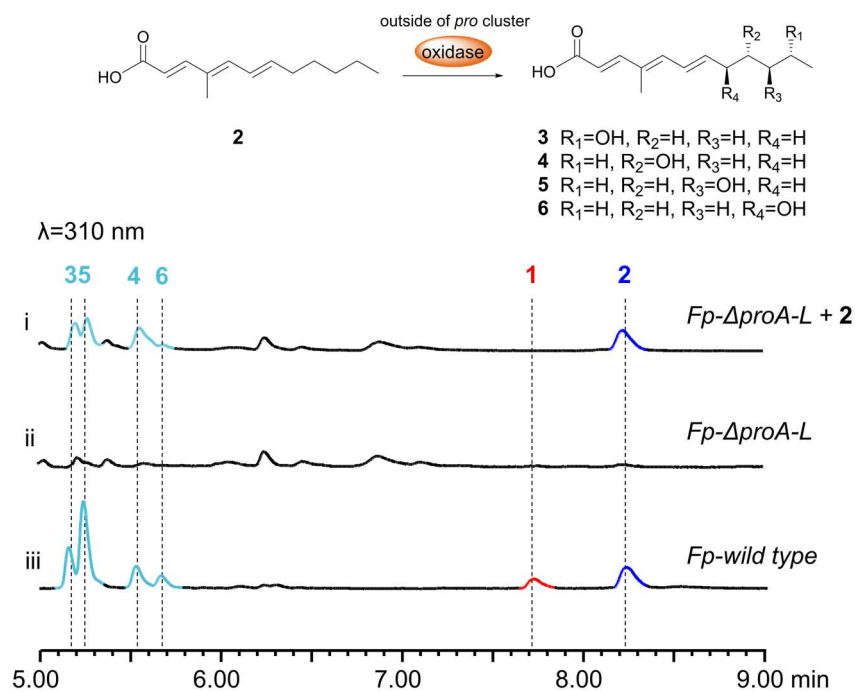

**Figure S8.** LC-MS analysis of the feeding assay of *Fp-ΔproA-L* towards compound **2**. Compounds **3–6** are over-oxidized off-pathway derivatives of **2** by *F. proliferatum*.

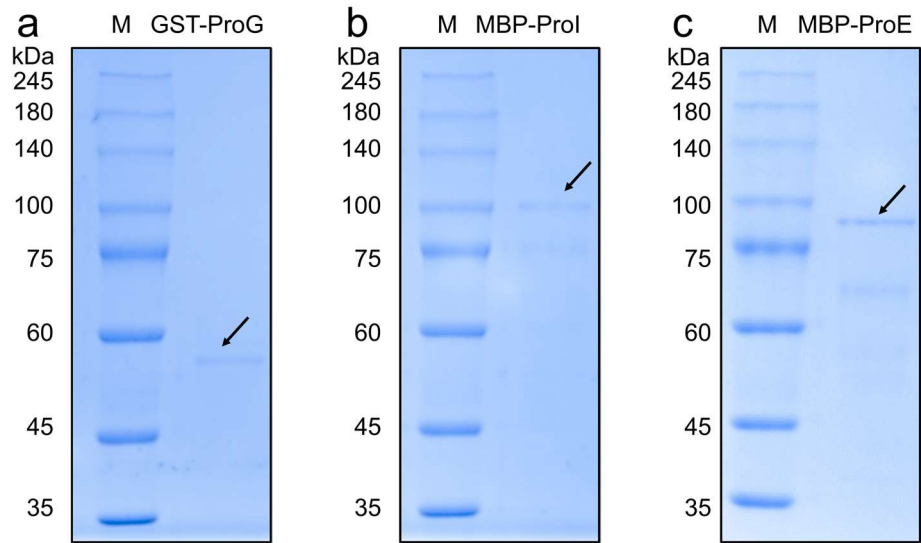

**Figure S9.** SDS-PAGE of proteins purified from *E. coli* BL21 in this study. a GST-ProG (54.9 kDa). b MBP-ProI (96.1 kDa). c MBP-ProE (98.8 kDa).

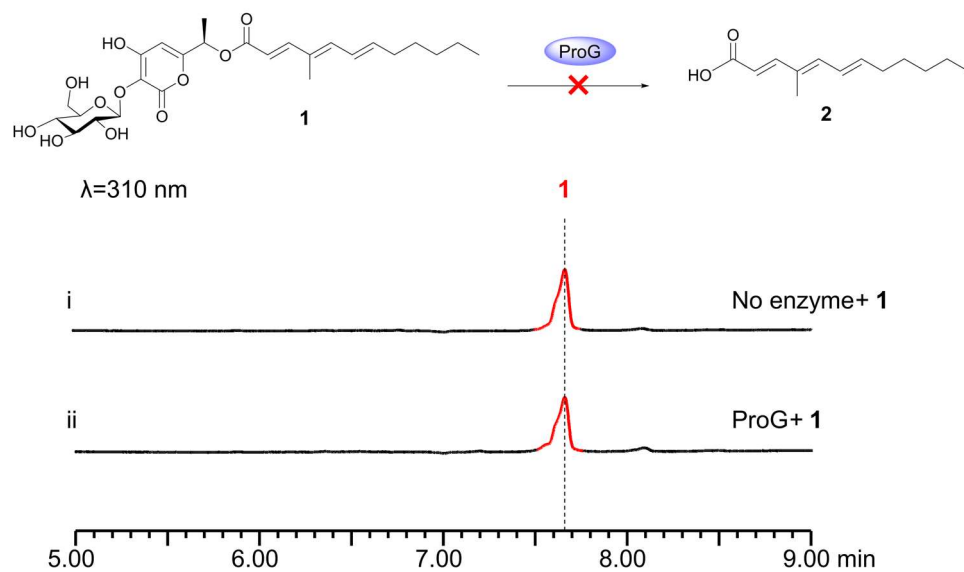

**Figure S10.** LC–MS analysis of the *in vitro* biochemical assays of  $\alpha, \beta$ -hydrolase ProG towards compound **1**. The conversion of **1** to **2** is not catalyzed by  $\alpha, \beta$ -hydrolase ProG.

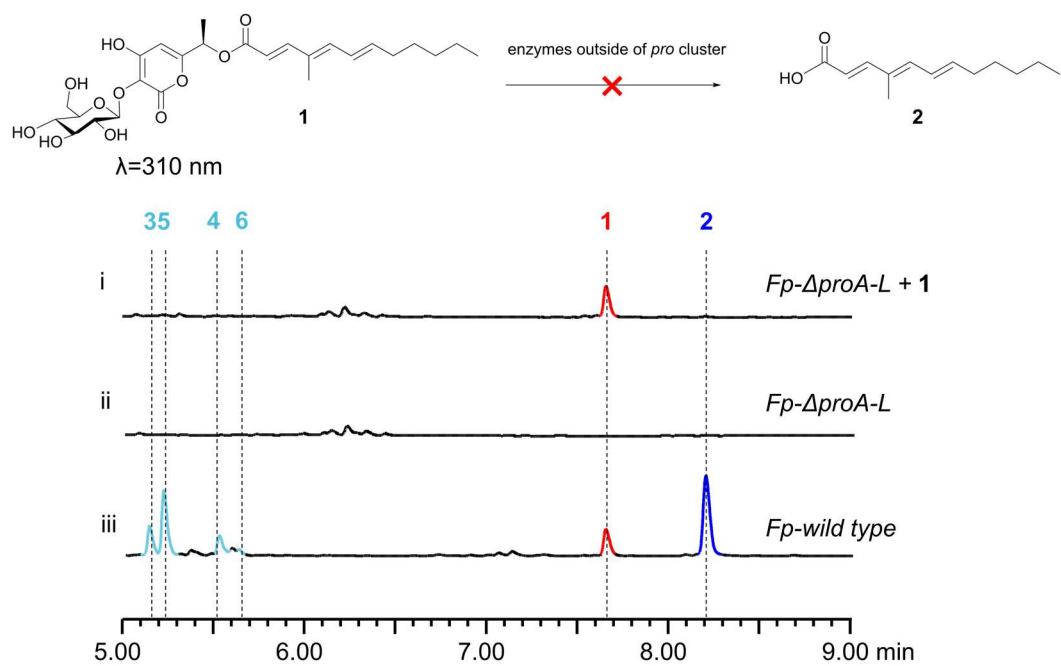

**Figure S11.** LC-MS analysis of the feeding assay of *Fp-ΔproA-L* towards compound **1**. Enzymes outside of *pro* cluster do not have the ability to catalyze the hydrolysis of **1** to **2**, indicating that it is an on-pathway conversion in *F. proliferatum*.

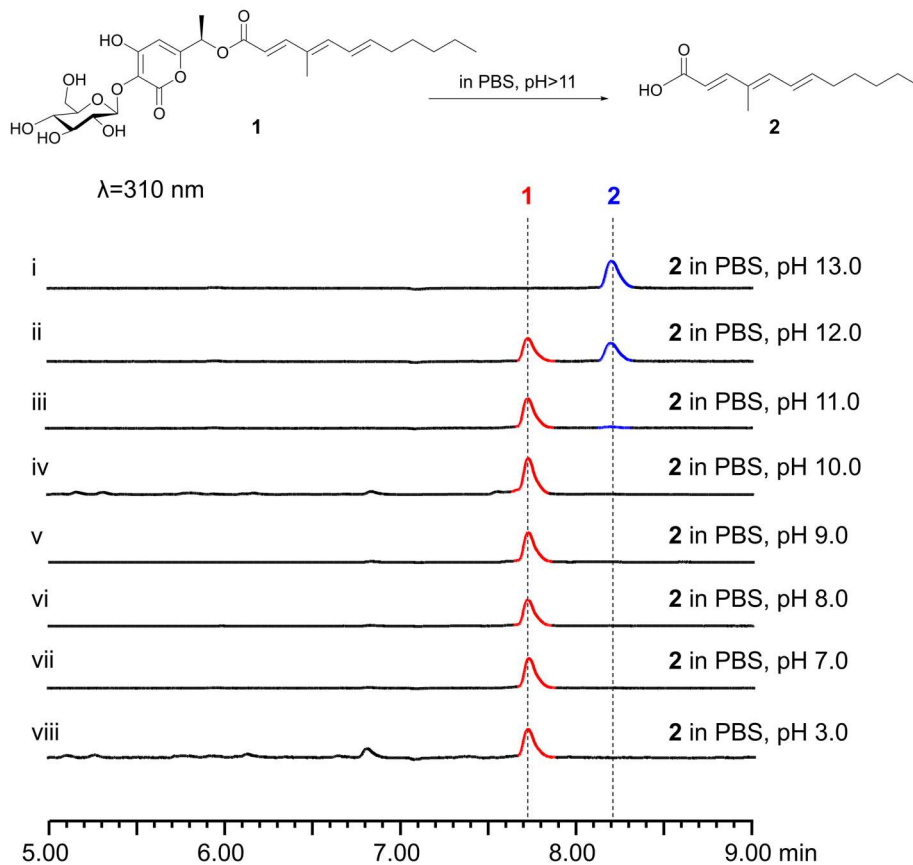

**Figure S12.** LC-MS analysis of compound **1** in PBS buffer under different pH values. The formation of **2** is only detected under strong base conditions (pH > 11).

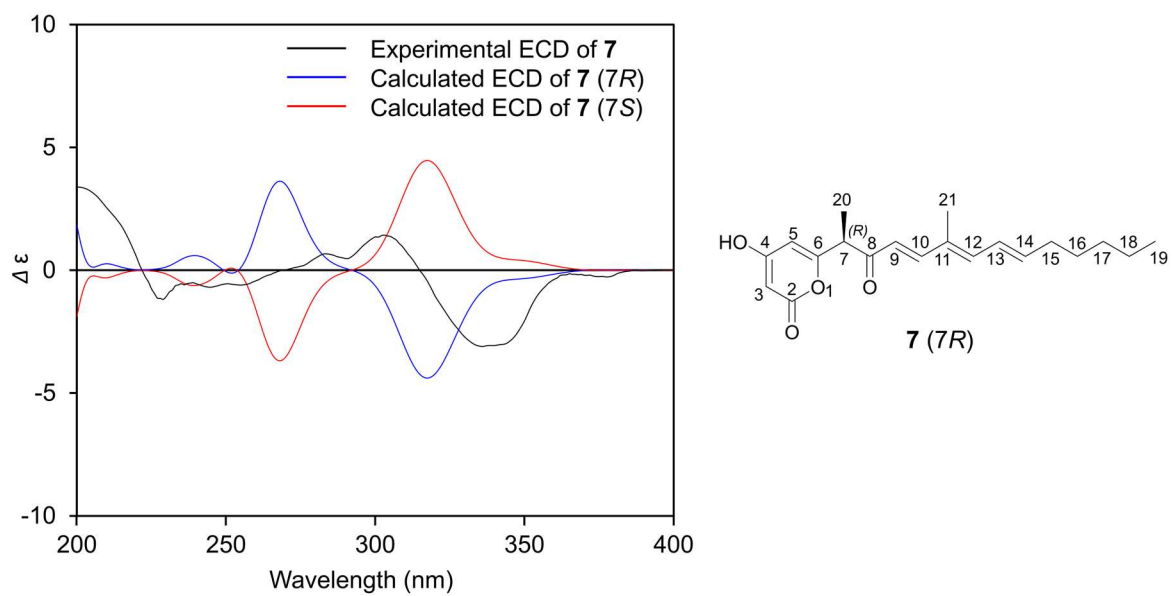

**Figure S13.** Comparison of calculated ECD spectra of (7*S*)- and (7*R*)-isomers with the experimental spectra of **7** (*c* 0.1 mg/mL, MeOH). The C7-methyl stereochemistry of **7** is confirmed to be *R* configuration.



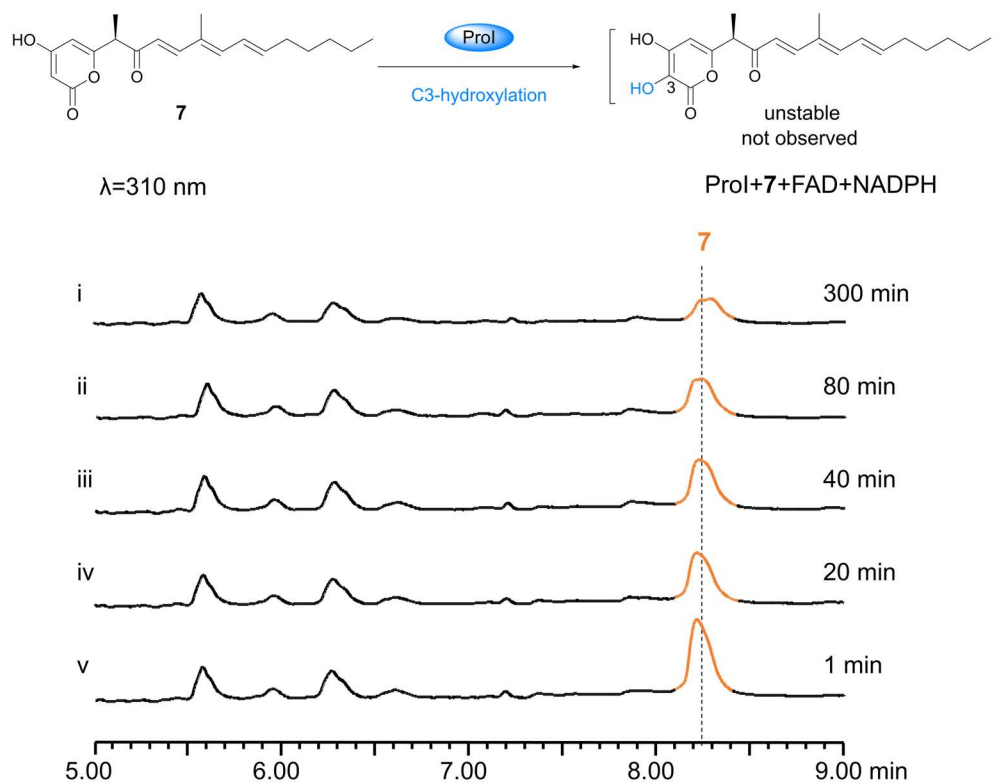

**Figure S14.** Time-course assays for FMO ProI towards compound **7**. Time-dependent decrease of **7** can be observed when it is incubated with ProI, the generation of the proposed product C3-hydroxyl **7** is not observed, implying hydroxylation occurring at the C3 of the pyrone ring of **7** possibly makes it unstable.

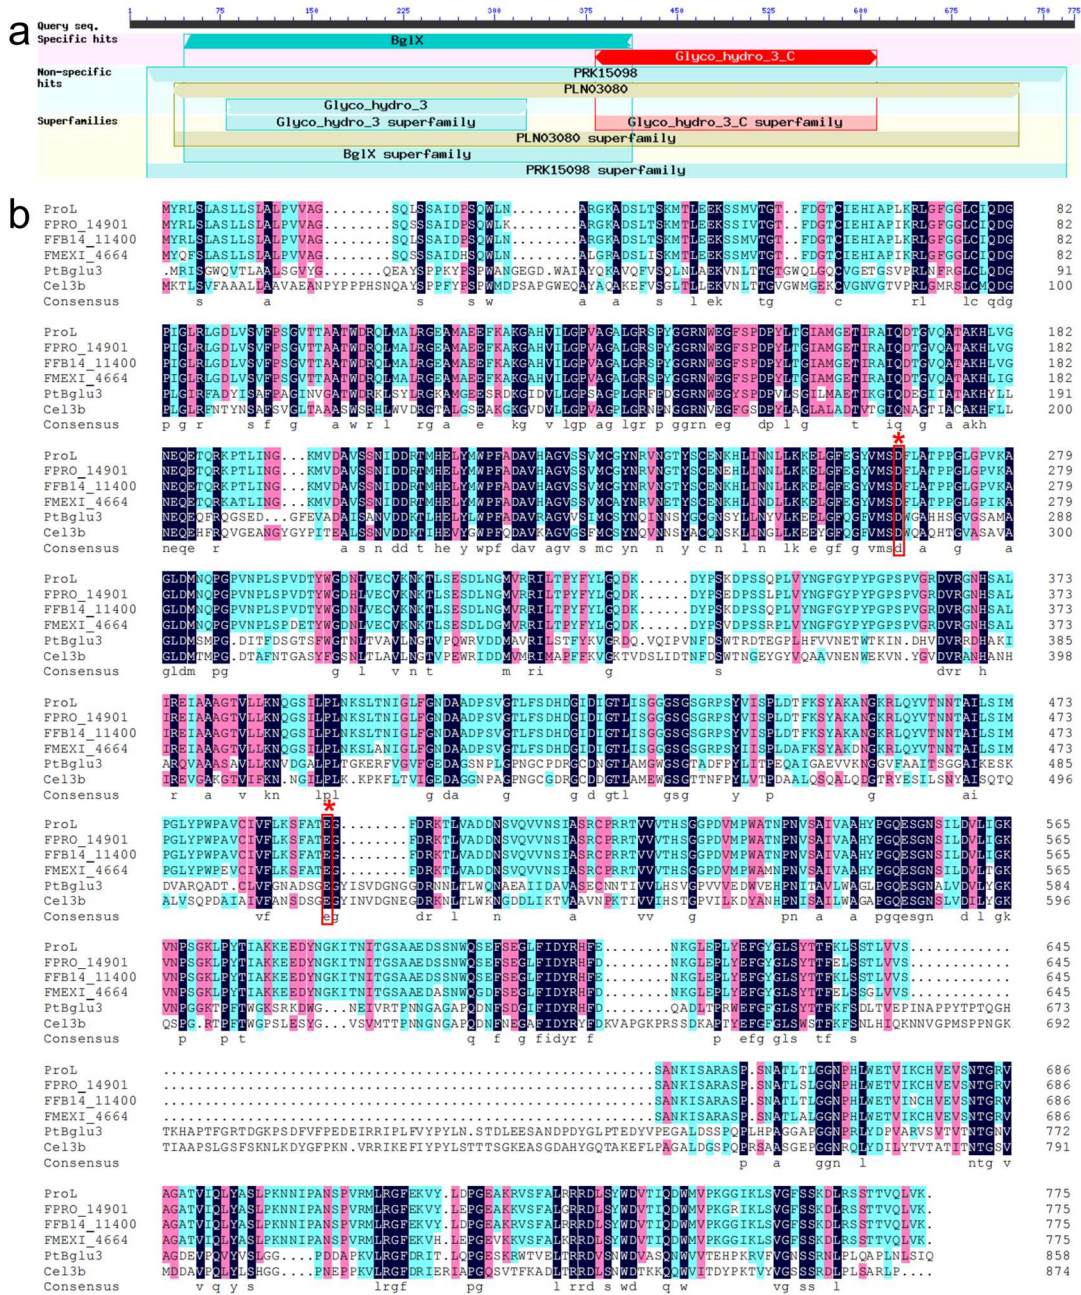

**Figure S15.** Bioinformatic analysis of  $\beta$ -glucosidase ProL. a Conserved domain analysis of ProL indicates that it belongs to the glycoside hydrolase family 3 (GH3) of  $\beta$ -glucosidase proteins. b Sequence alignments of ProL with homologous  $\beta$ -glucosidase proteins showed that it harbors the classical catalytic amino acid residues, the red box shows the conserved catalytic residues aspartate and glutamate in  $\beta$ -glucosidase that involved in the hydrolysis of glycosidic bonds. The sequences of  $\beta$ -glucosidase were downloaded from NCBI database.

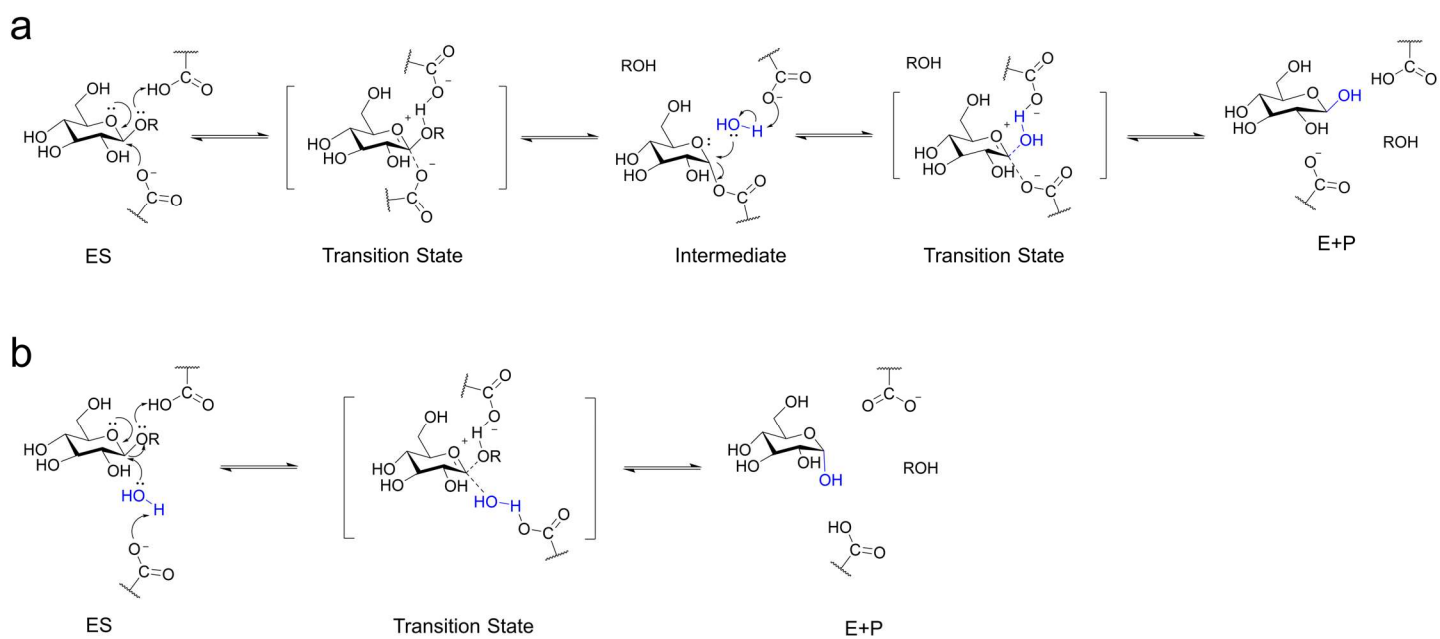

**Figure S16.** Traditional catalytic mechanism of  $\beta$ -glucosidase that hydrolyze glycosidic bonds. a Mechanism of action of retaining  $\beta$ -glucosidase. b Mechanism of action of inverting  $\beta$ -glucosidase.

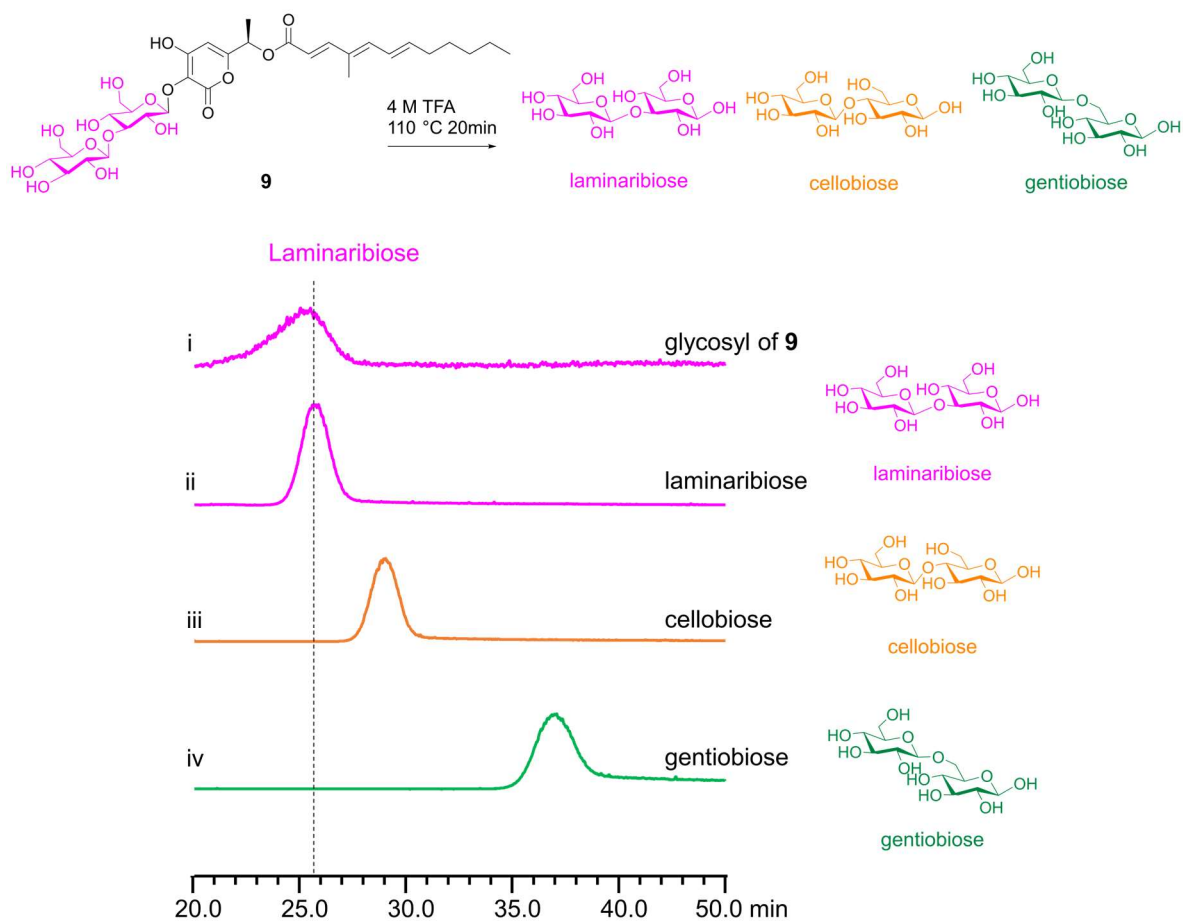

**Figure S17.** HPLC (evaporative light scattering detector) analysis of the glycosyl of compound **9**. By comparison with the standards of disaccharides as well as NMR analysis (Tables S17–18 and Figures S96–109), the di-glucose moiety of **9** is confirmed to be laminaribiose.

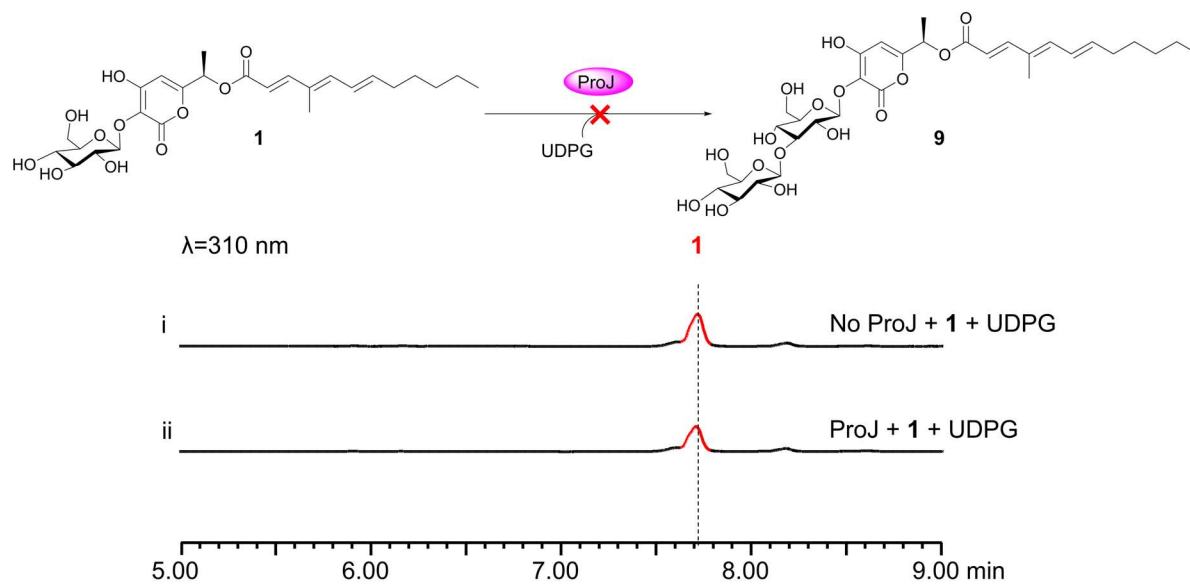

**Figure S18.** LC-MS analysis of the *in vitro* biochemical assays of mGT ProJ towards compound **1**. mGT ProJ is not responsible for catalyzing the glycosylation of **1** to produce **9**.

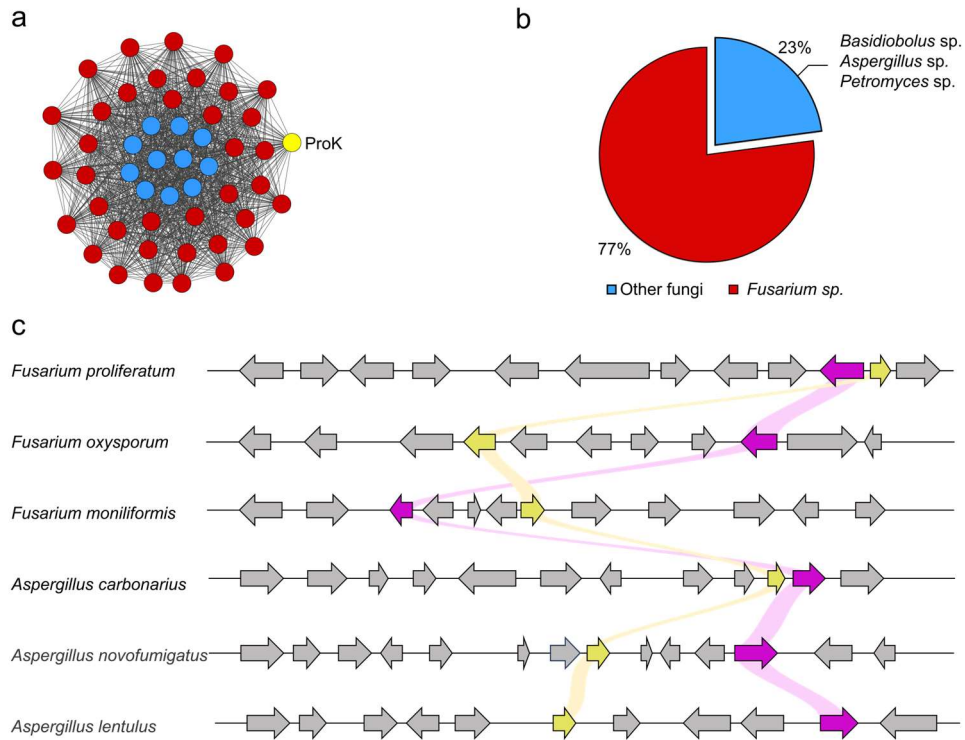

**Figure S19.** Sequence similarity network (SSN) analysis of unknown function protein ProK. a The homologue proteins of unknown function protein ProK are a very small family clade in fungi (n = 47). ProK is shown in yellow, proteins from *Fusarium* sp. and other fungi are shown in red and blue, respectively. b Distribution of homologue proteins of ProK in fungi, the homologous genes of ProK are mainly distributed in the *Fusarium* sp. (77%). c Clusters containing ProK and its homologues protein from diverse fungi analyzed by EFI-GNT (EFI Genome Neighborhood Tool). Genes encoding ProK homologues are shown in yellow, and genes encoding glycosyltransferase are shown in purple.

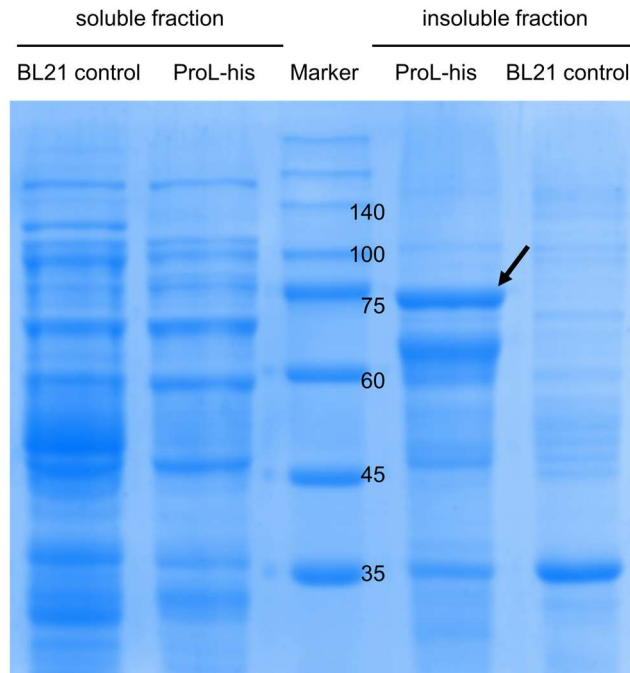

**Figure S20.** The  $\beta$ -glucosidase ProL with His-tag in *E. coli* BL21 is insoluble.

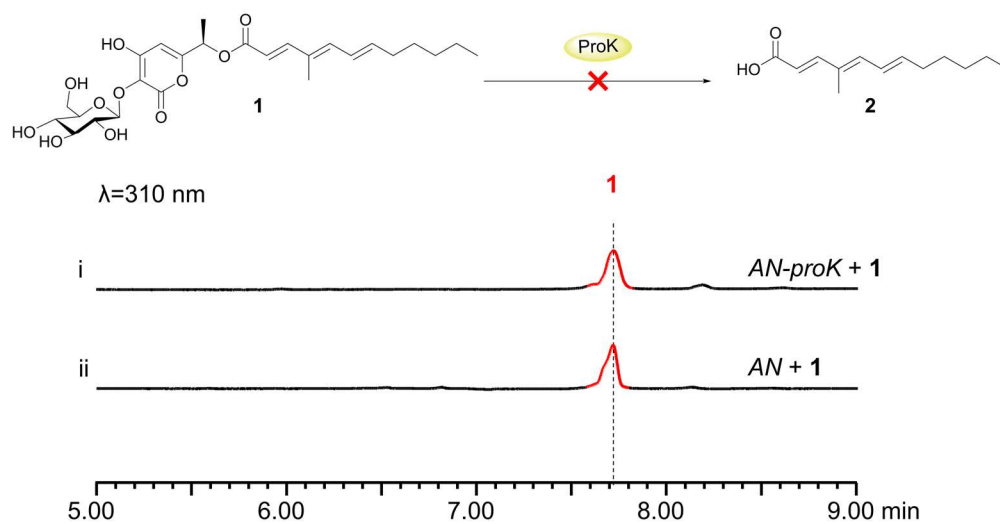

**Figure S21.** LC-MS analysis of *in vitro* biochemical assays of crude enzymes of *AN-proK* towards compound **1**. Unknown function protein ProK is not responsible for catalyzing the hydrolysis of **1** to **2**.



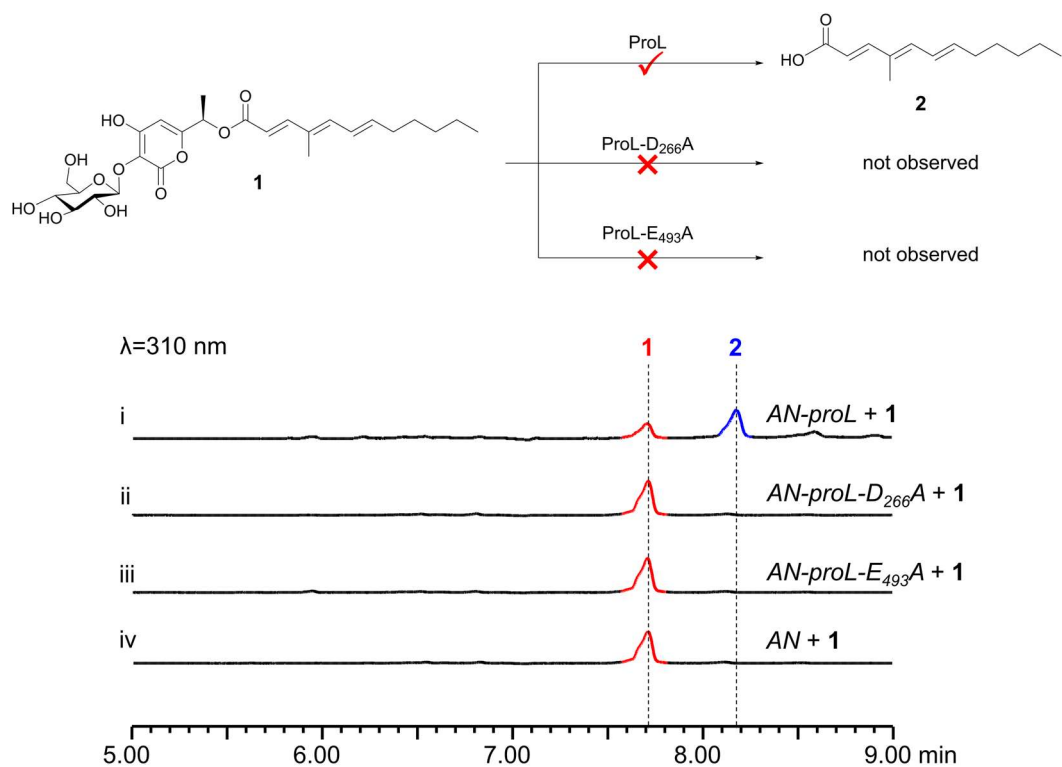

**Figure S22.** LC–MS analysis of mutagenesis experiments on the conventional active sites D266 and E493 of  $\beta$ -glucosidases in ProL towards compound **1**. ProL harbors the classical catalytic amino acid residues (D266 and E493) of  $\beta$ -glucosidases to mediate the hydrolysis of the ester bond of **1** to form **2**.

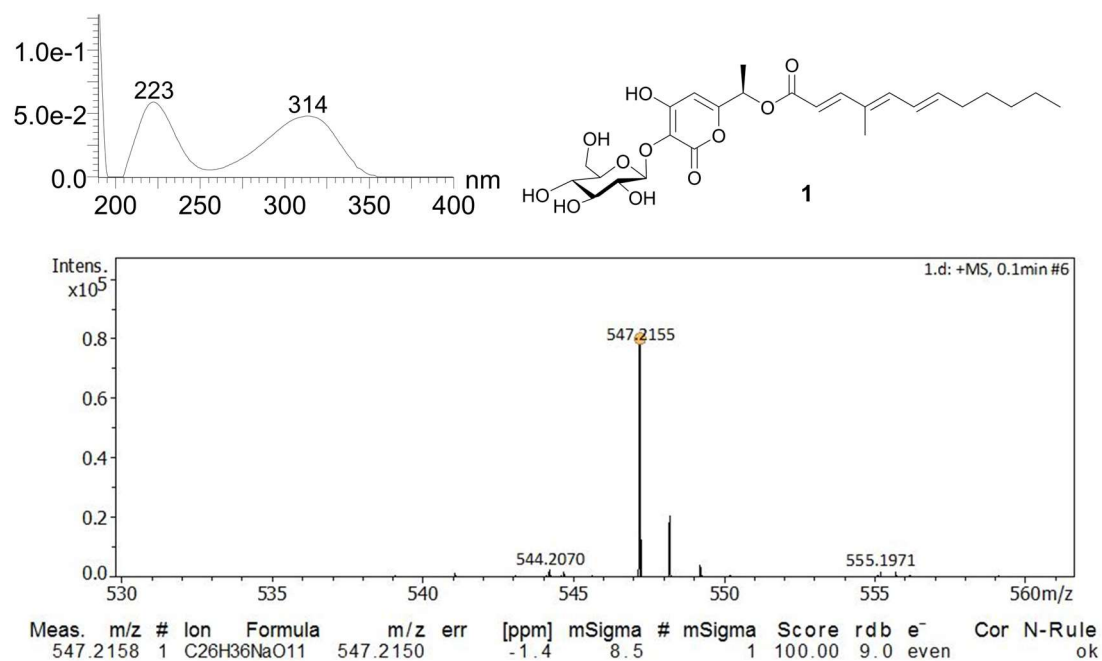

**Figure S23.** UV absorption and HRMS spectrum (positive ionization) analysis of compound 1.

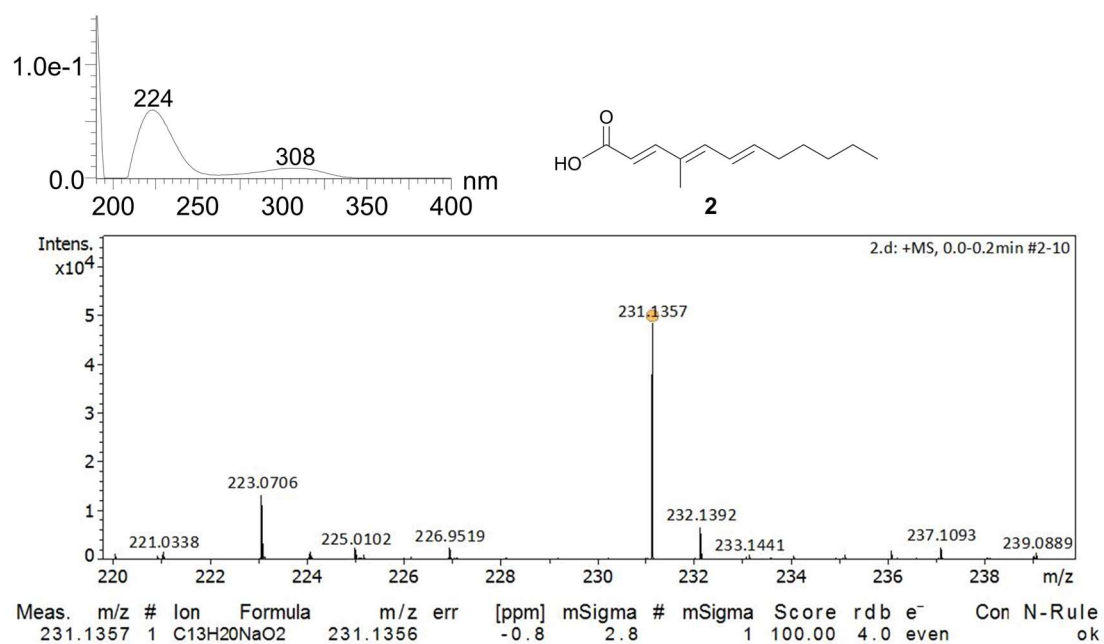

**Figure S24.** UV absorption and HRMS spectrum (positive ionization) analysis of compound 2.

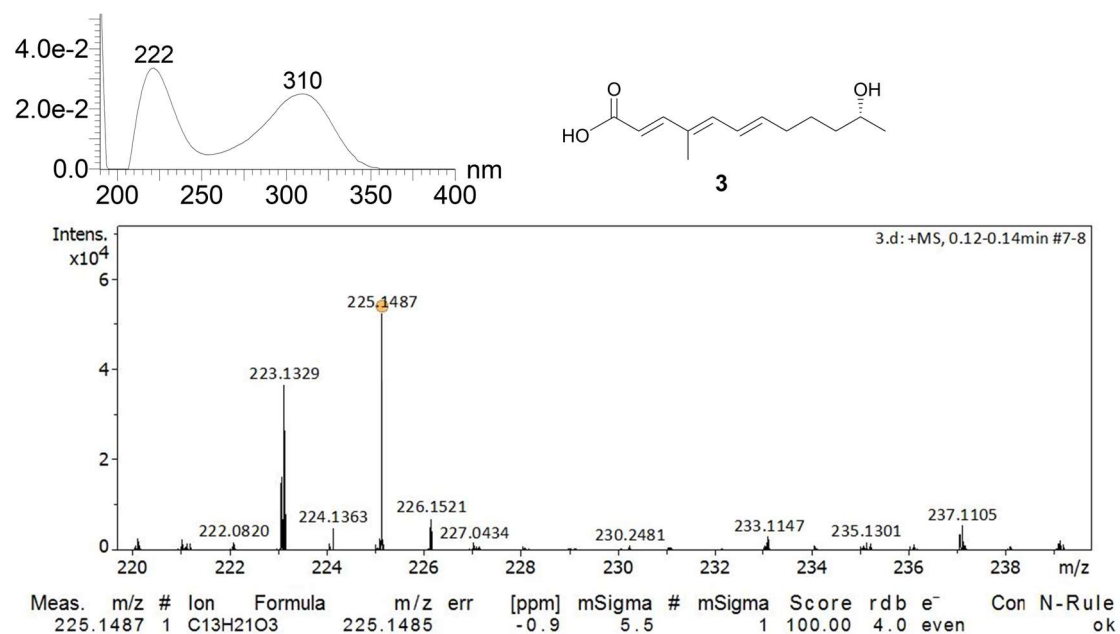

**Figure S25.** UV absorption and HRMS spectrum (positive ionization) analysis of compound 3.

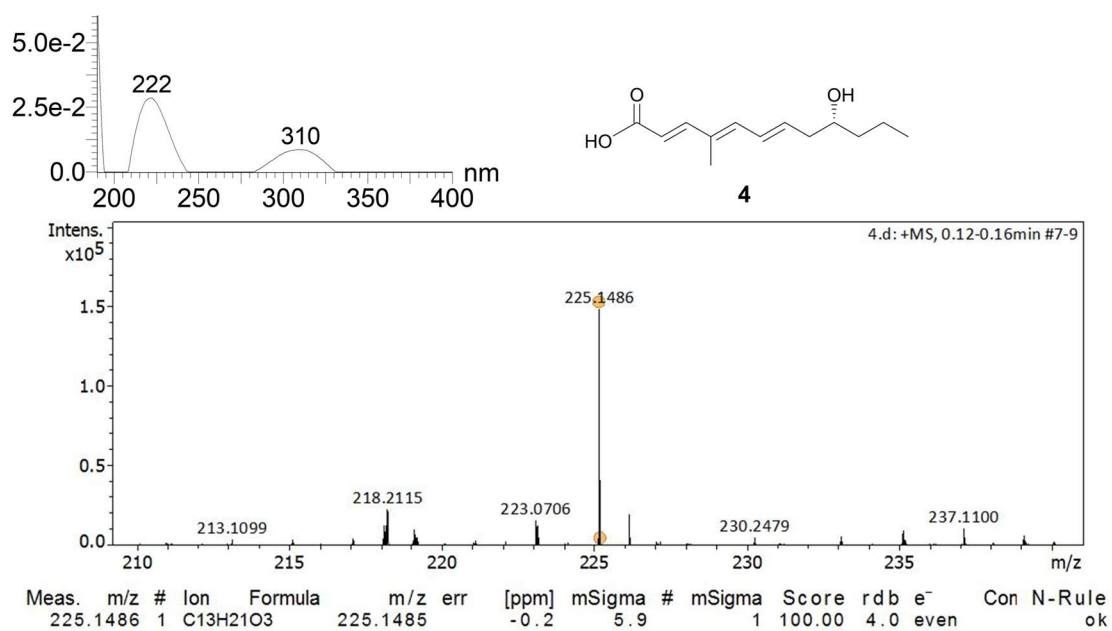

**Figure S26.** UV absorption and HRMS spectrum (positive ionization) analysis of compound 4.

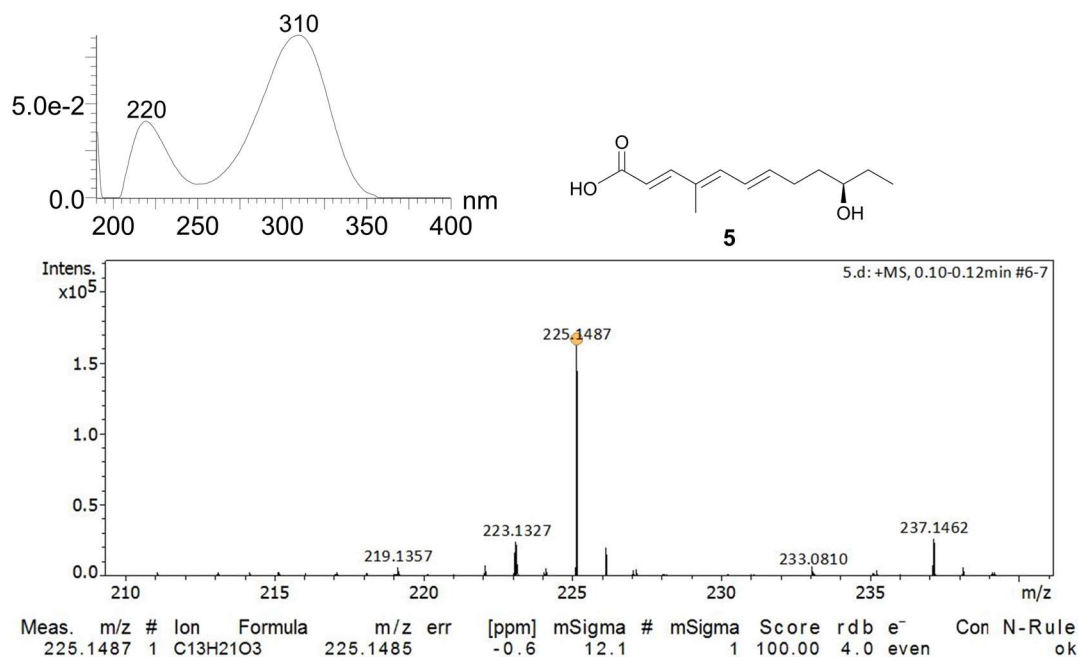

Figure S27. UV absorption and HRMS spectrum (positive ionization) analysis of compound 5.

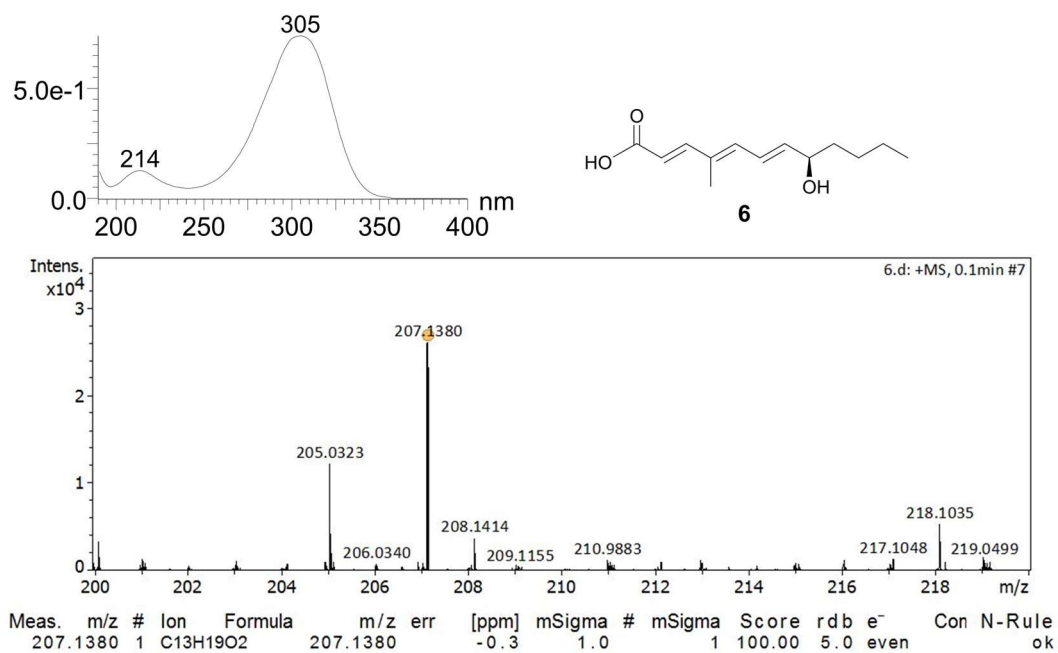

Figure S28. UV absorption and HRMS spectrum (positive ionization) analysis of compound 6.

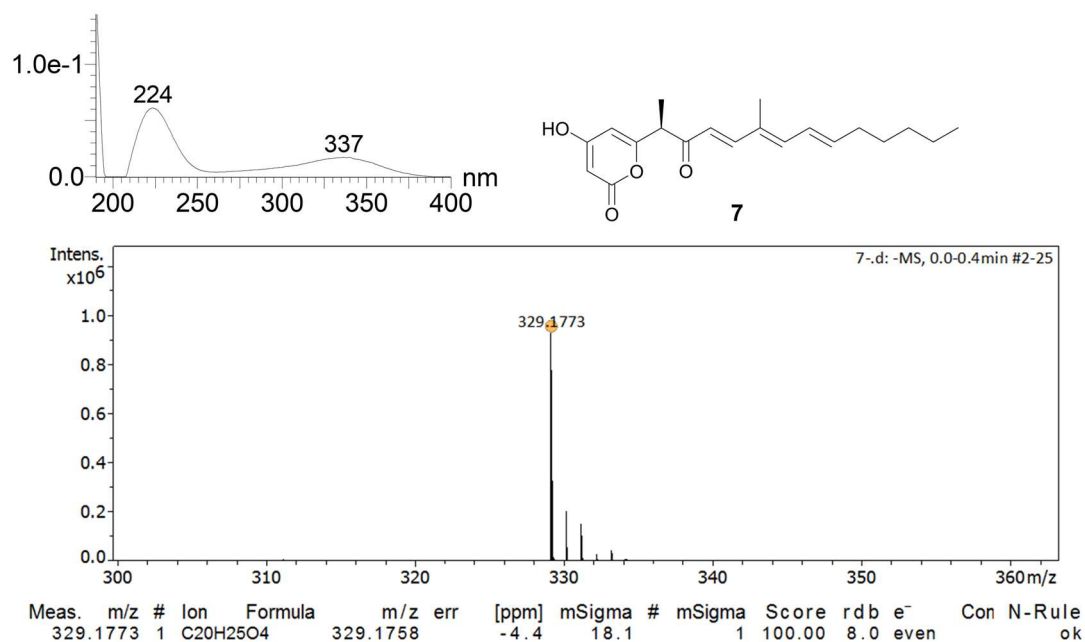

Figure S29. UV absorption and HRMS spectrum (negative ionization) analysis of compound 7.

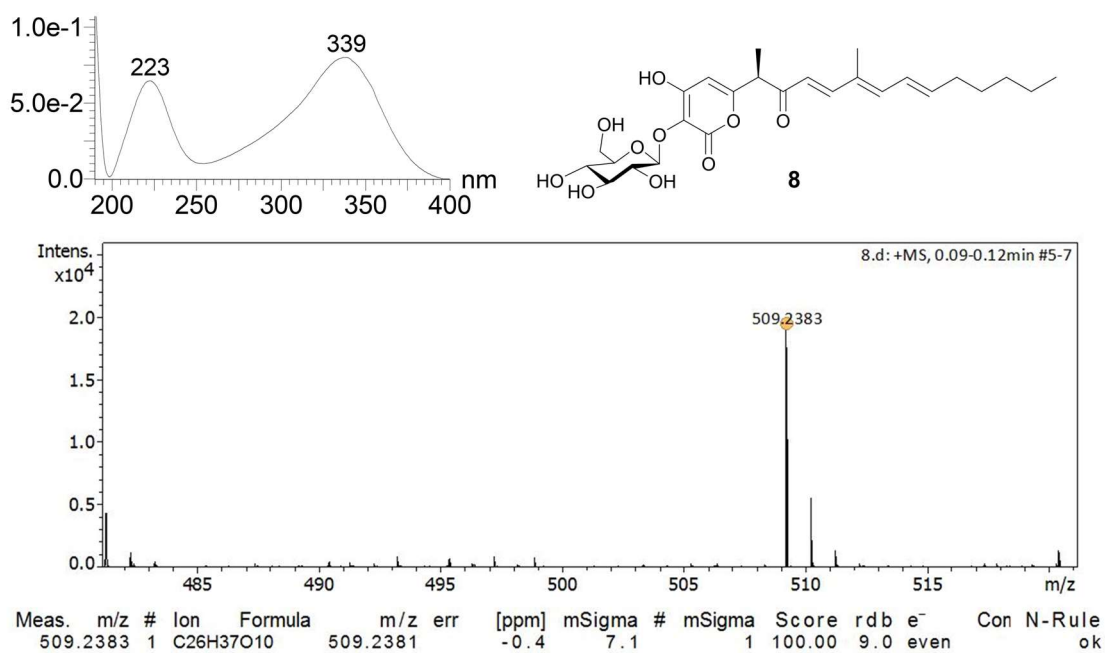

Figure S30. UV absorption and HRMS spectrum (positive ionization) analysis of compound 8.

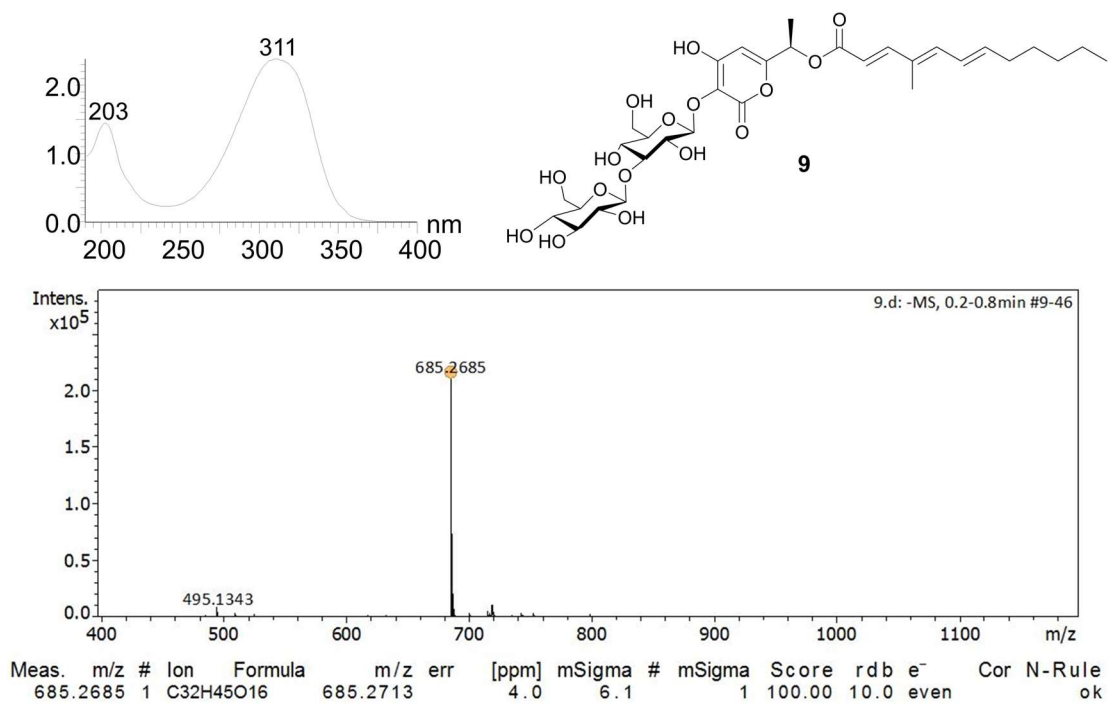

**Figure S31.** UV absorption and HRMS spectrum (negative ionization) analysis of compound **9**.

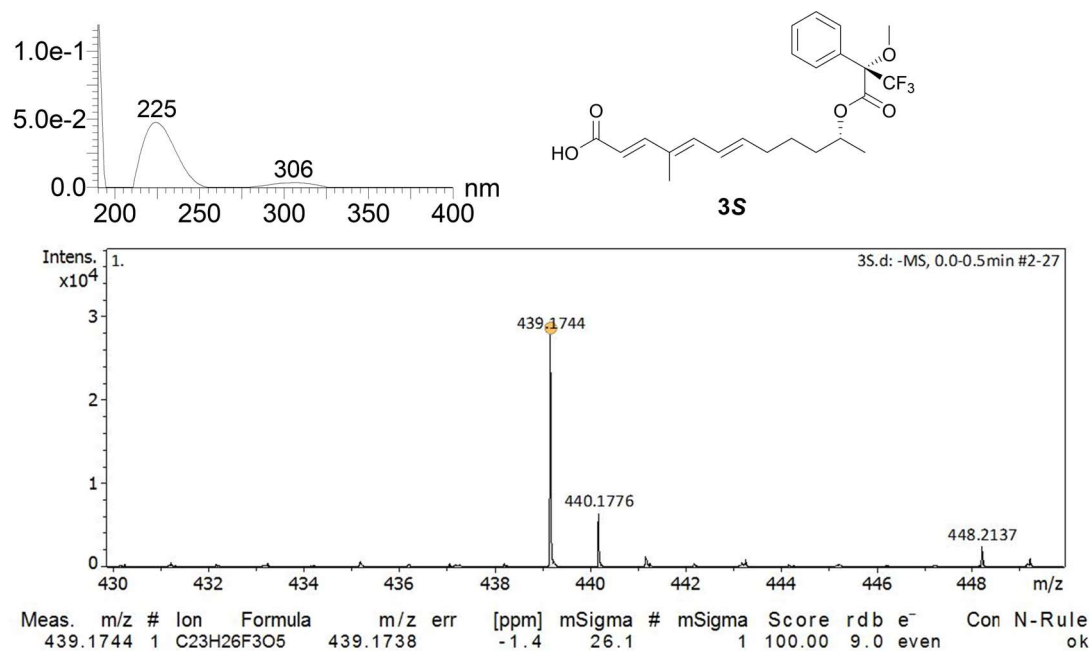

**Figure S32.** UV absorption and HRMS spectrum (negative ionization) analysis of compound **3S**.

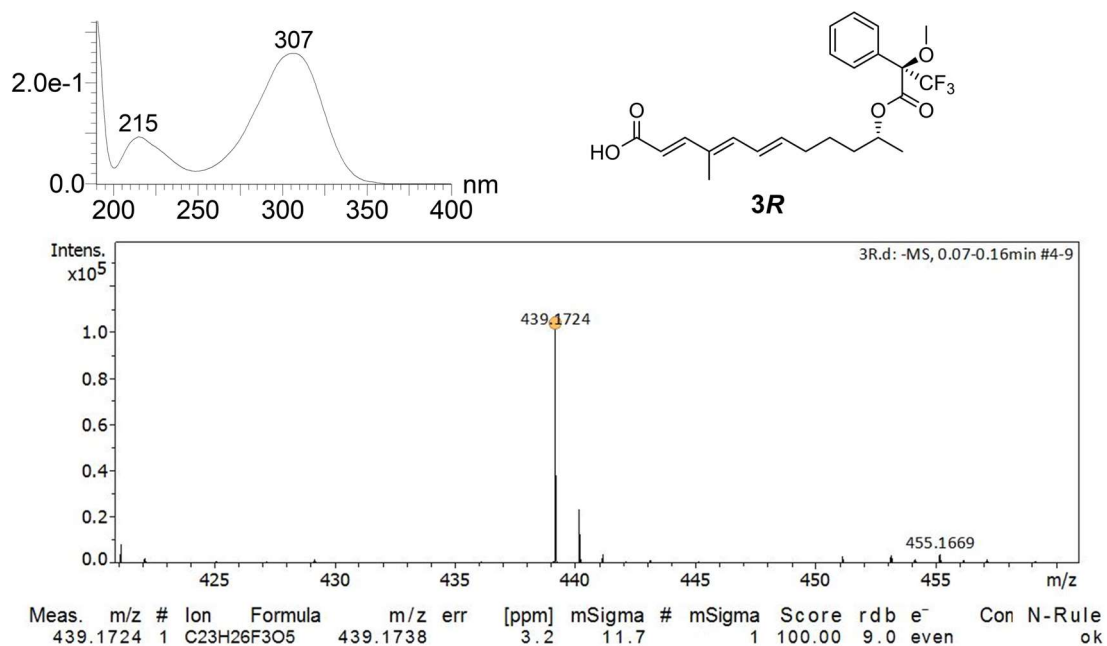

**Figure S33.** UV absorption and HRMS spectrum (negative ionization) analysis of compound **3R**.

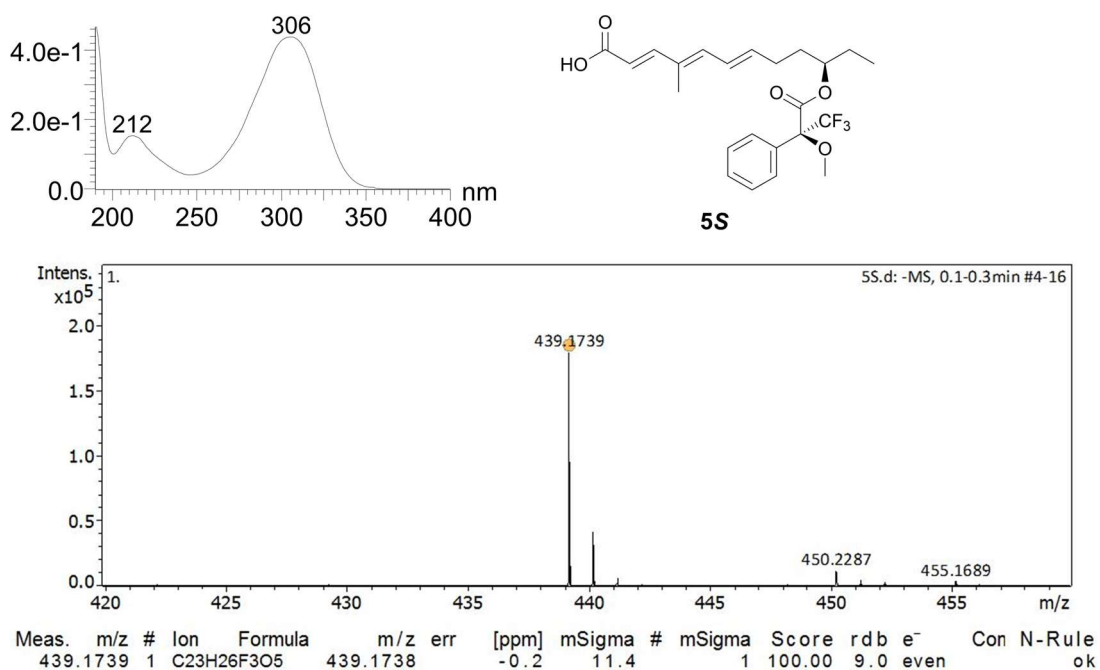

**Figure S34.** UV absorption and HRMS spectrum (negative ionization) analysis of compound **5S**.

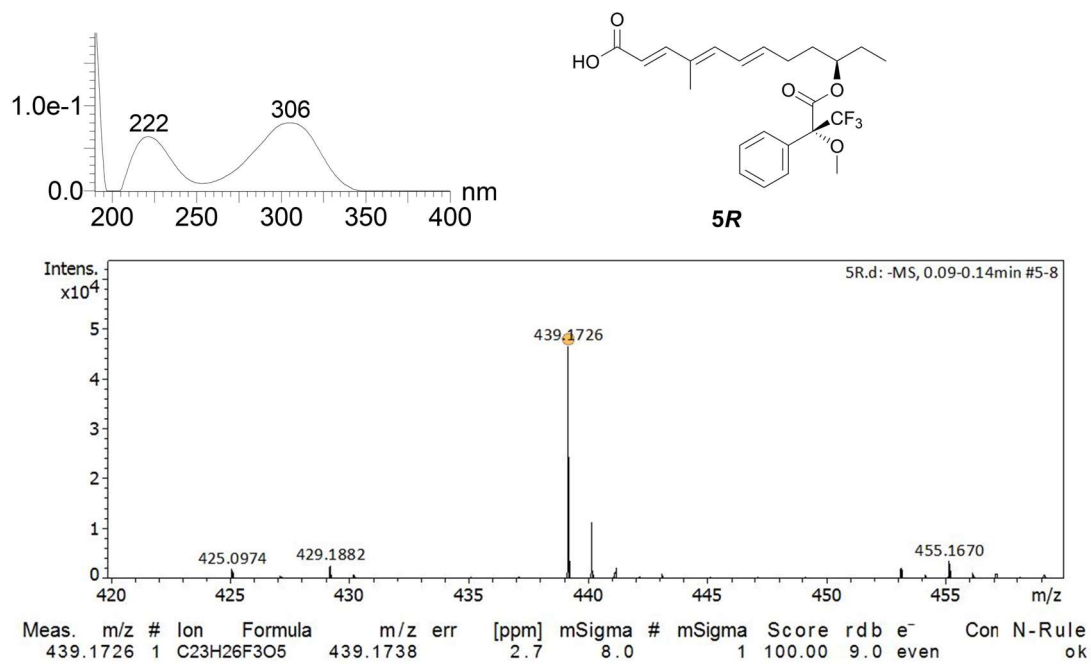

**Figure S35.** UV absorption and HRMS spectrum (negative ionization) analysis of compound **5R**.



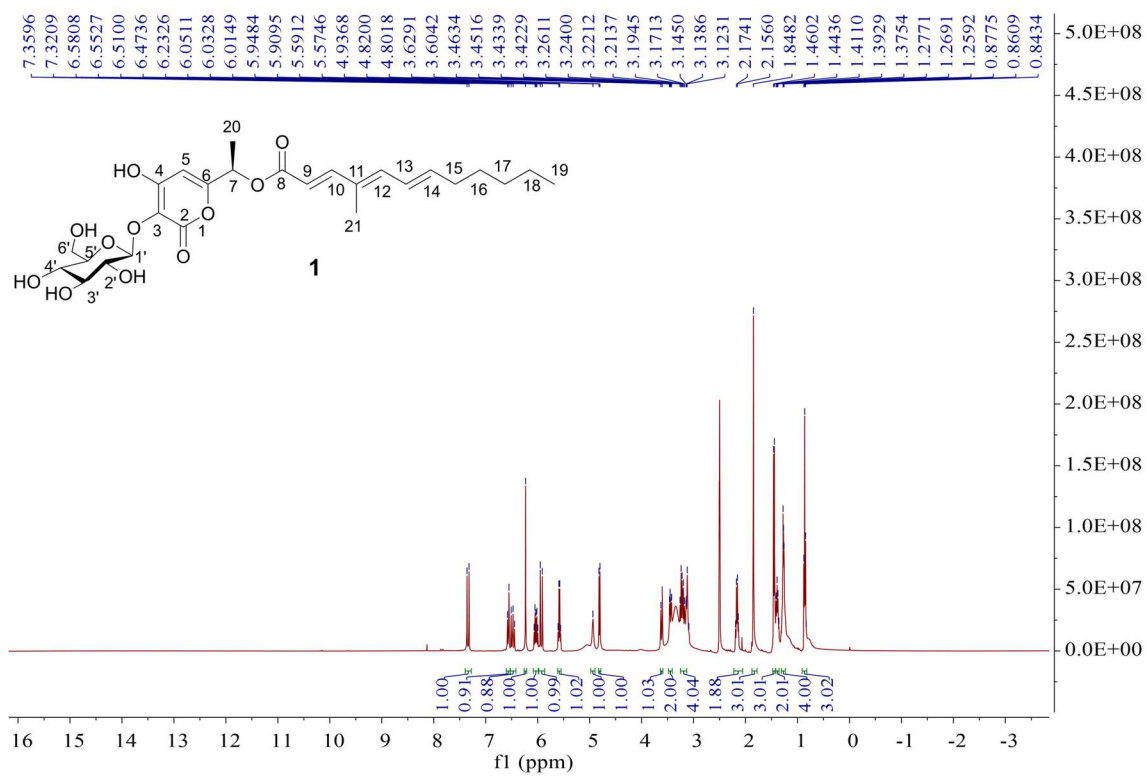

**Figure S36.** <sup>1</sup>H NMR spectrum of compound **1** in DMSO-*d*<sub>6</sub> (400 MHz).

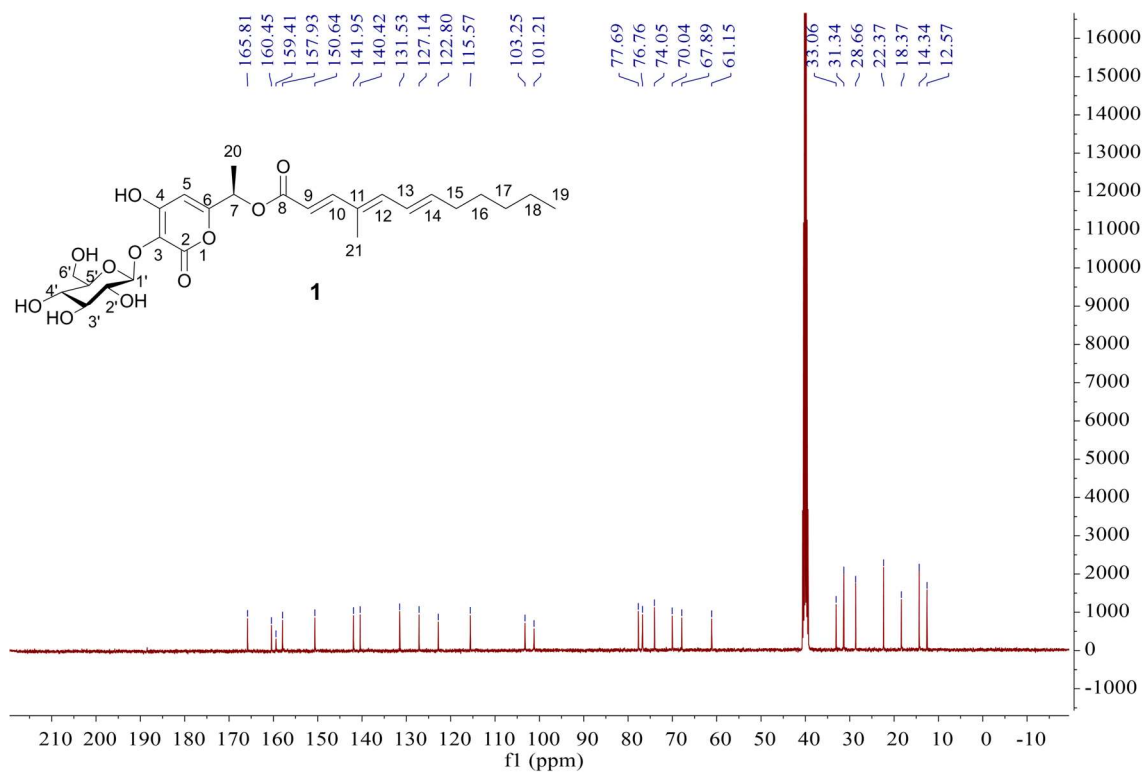

**Figure S37.**  $^{13}\text{C}$  NMR spectrum of compound **1** in  $\text{DMSO-}d_6$  (100 MHz).

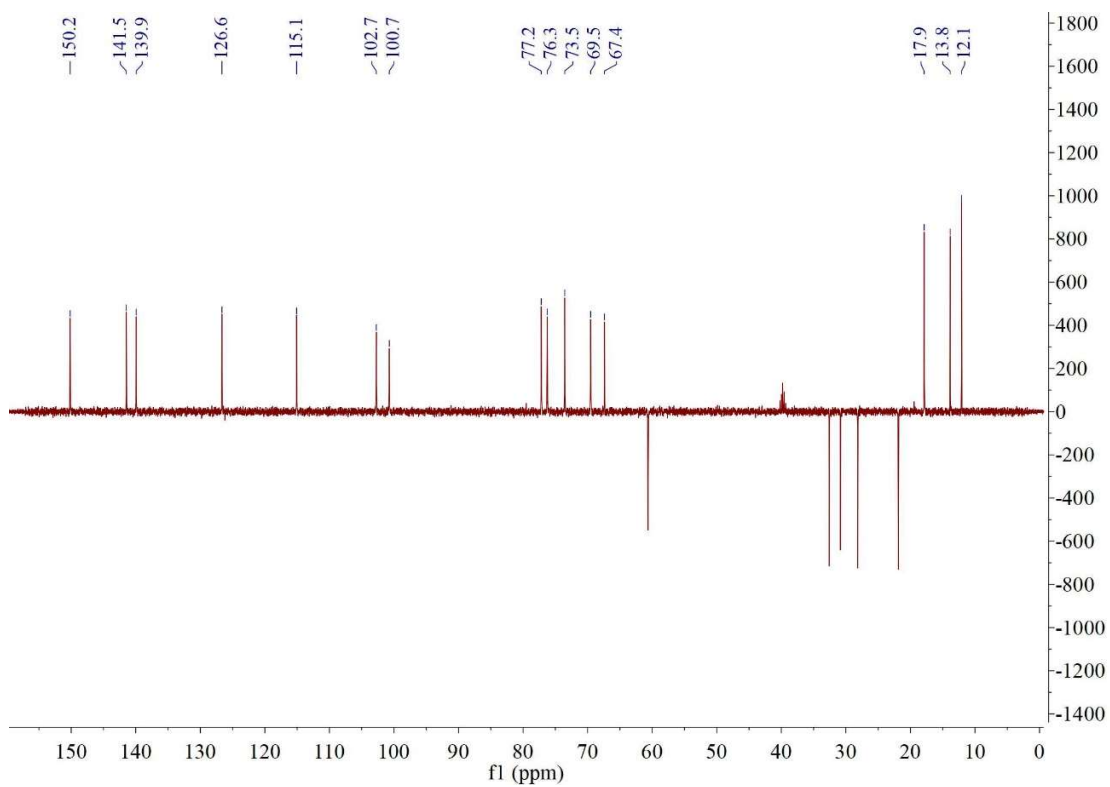

**Figure S38.** DEPT-135° spectrum of compound **1** in DMSO-*d*<sub>6</sub>.

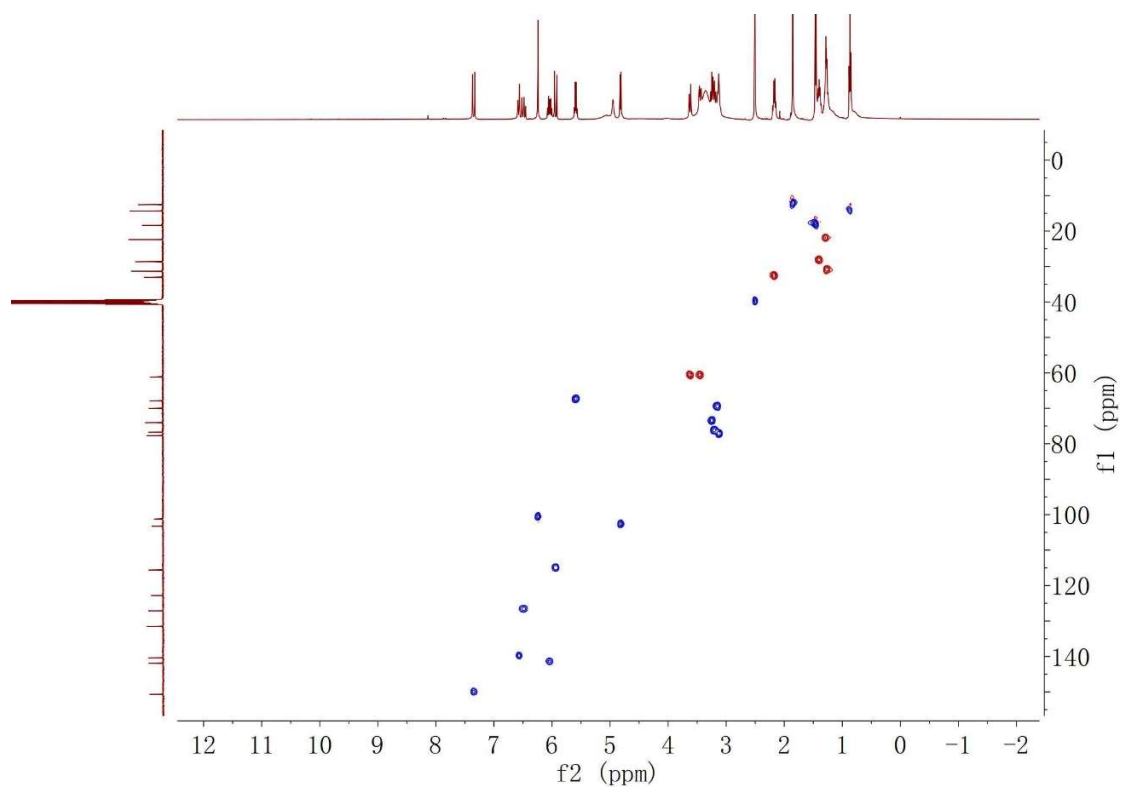

**Figure S39.** HSQC spectrum of compound **1** in DMSO-*d*<sub>6</sub>.

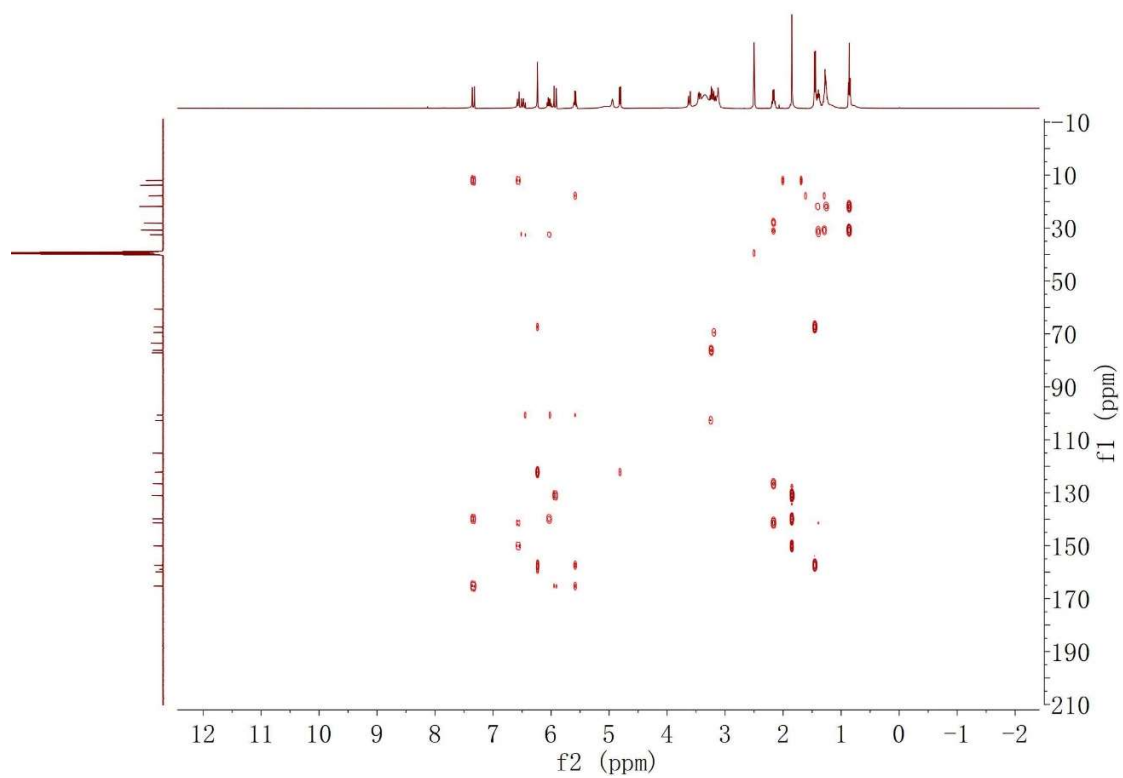

**Figure S40.** HMBC spectrum of compound **1** in DMSO-*d*<sub>6</sub>.

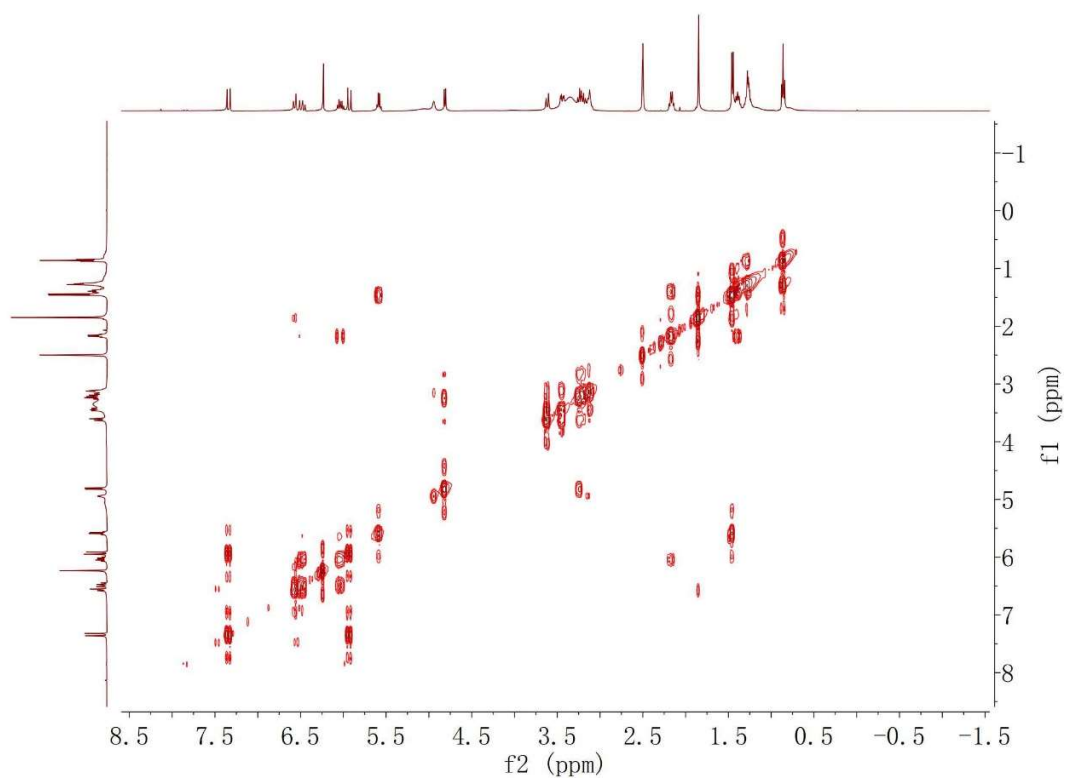

**Figure S41.**  $^1\text{H}$ - $^1\text{H}$  COSY spectrum of compound **1** in  $\text{DMSO-}d_6$ .

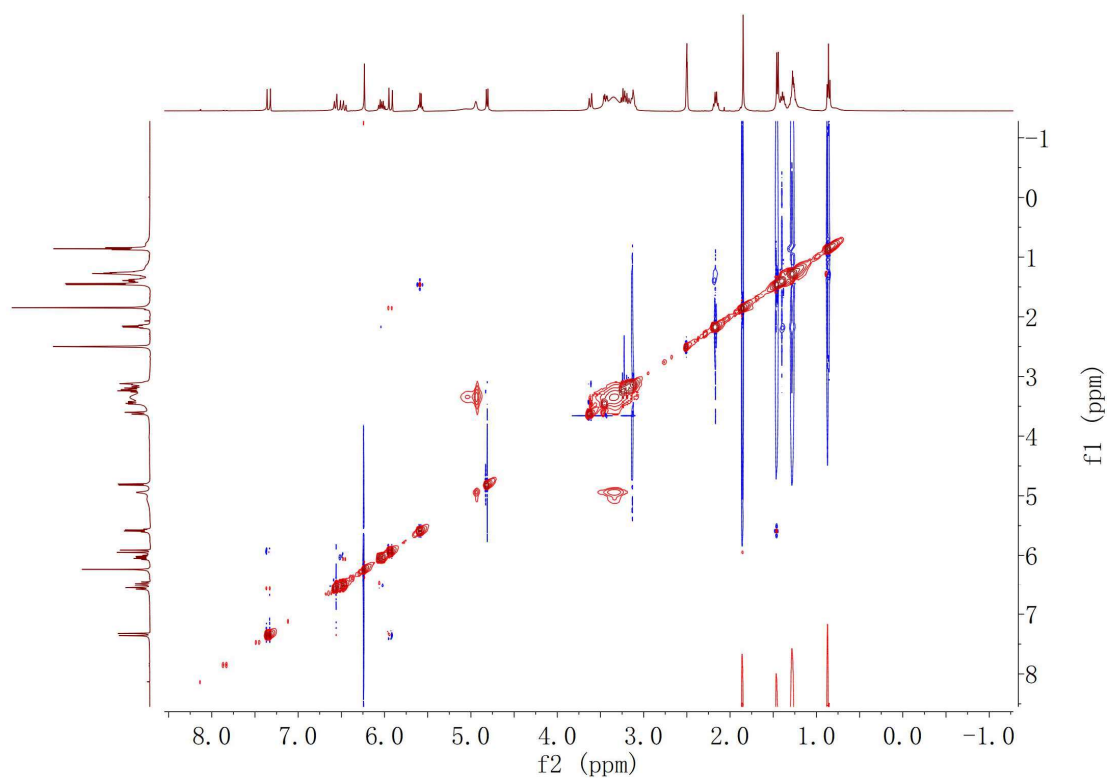

**Figure S42.**  $^1\text{H}$ - $^1\text{H}$  NOESY spectrum of compound **1** in  $\text{DMSO-}d_6$ .

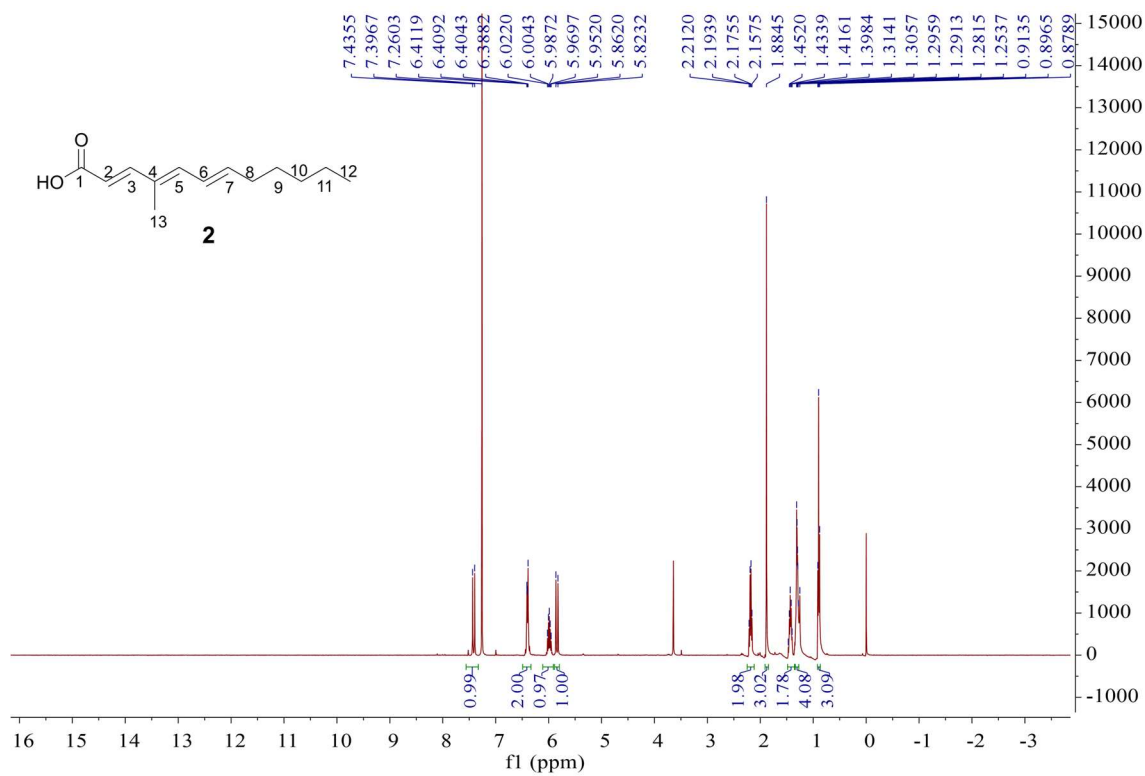

**Figure S43.** <sup>1</sup>H NMR spectrum of compound **2** in CDCl<sub>3</sub> (400 MHz).



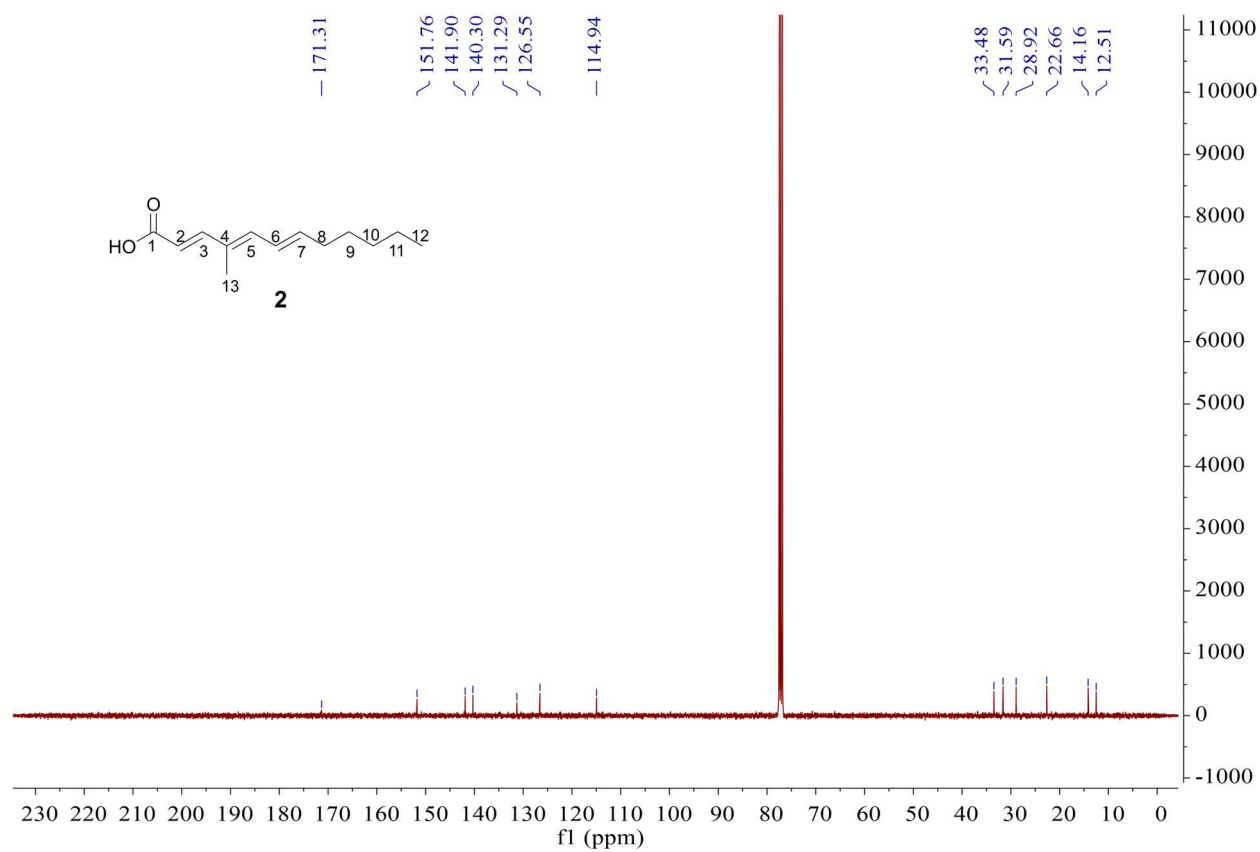

**Figure S44.**  $^{13}\text{C}$  NMR spectrum of compound **2** in  $\text{CDCl}_3$  (100 MHz).

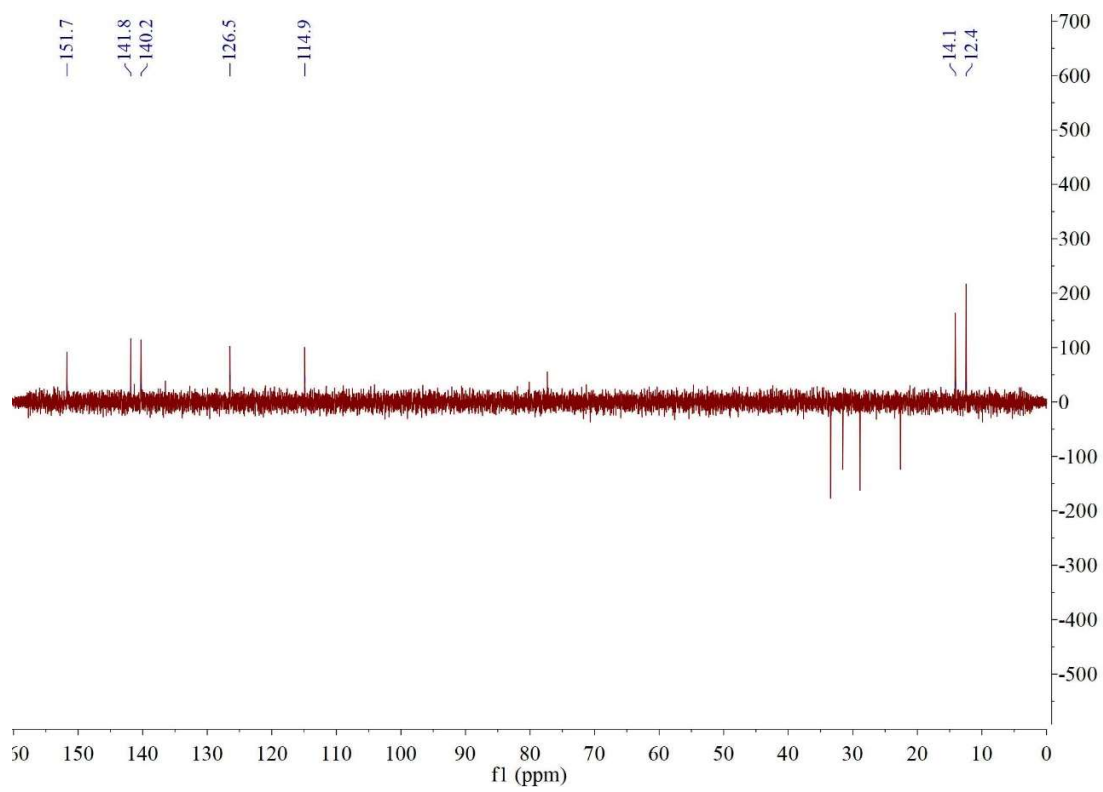

**Figure S45.** DEPT-135° spectrum of compound **2** in CDCl<sub>3</sub>.

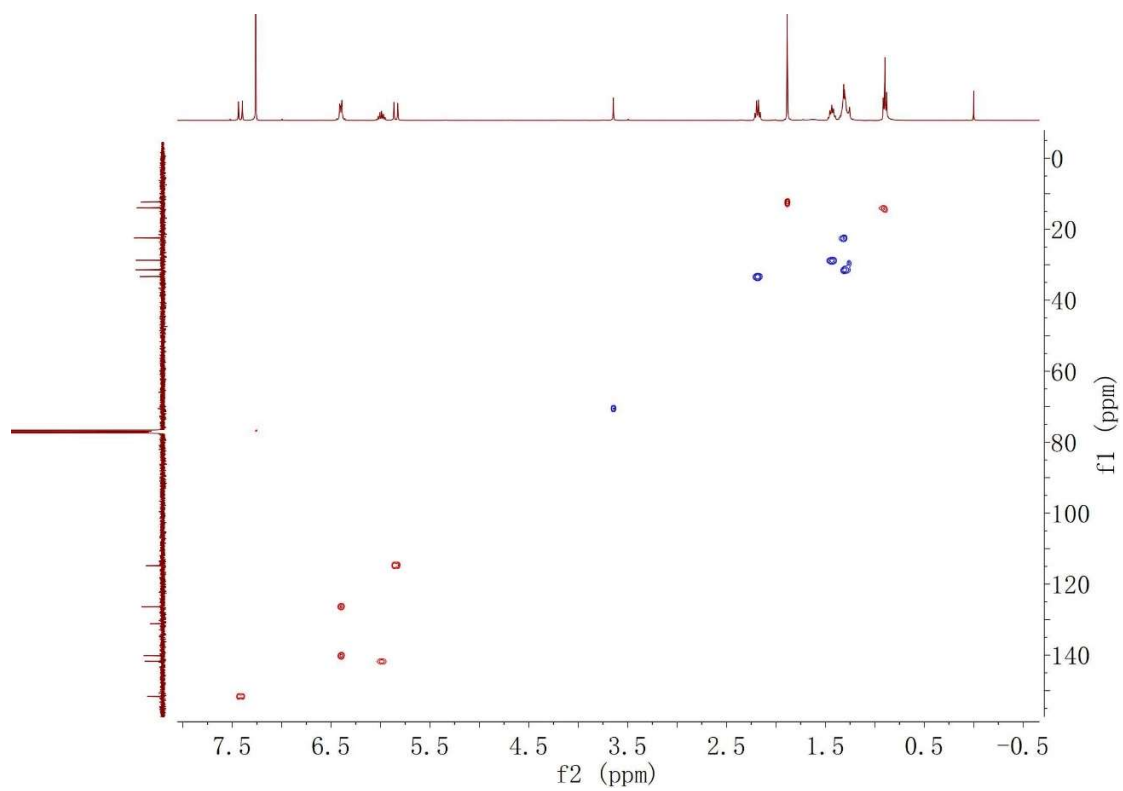

**Figure S46.** HSQC spectrum of compound **2** in  $\text{CDCl}_3$ .

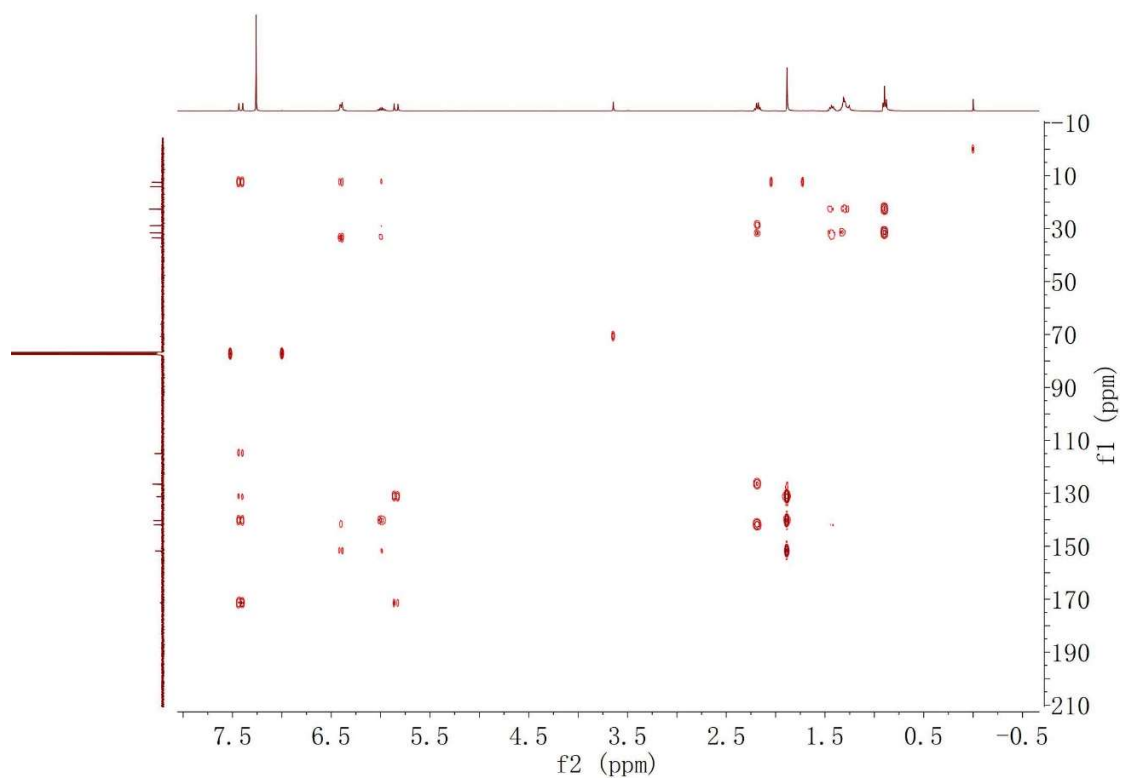

**Figure S47.** HMBC spectrum of compound **2** in CDCl<sub>3</sub>.

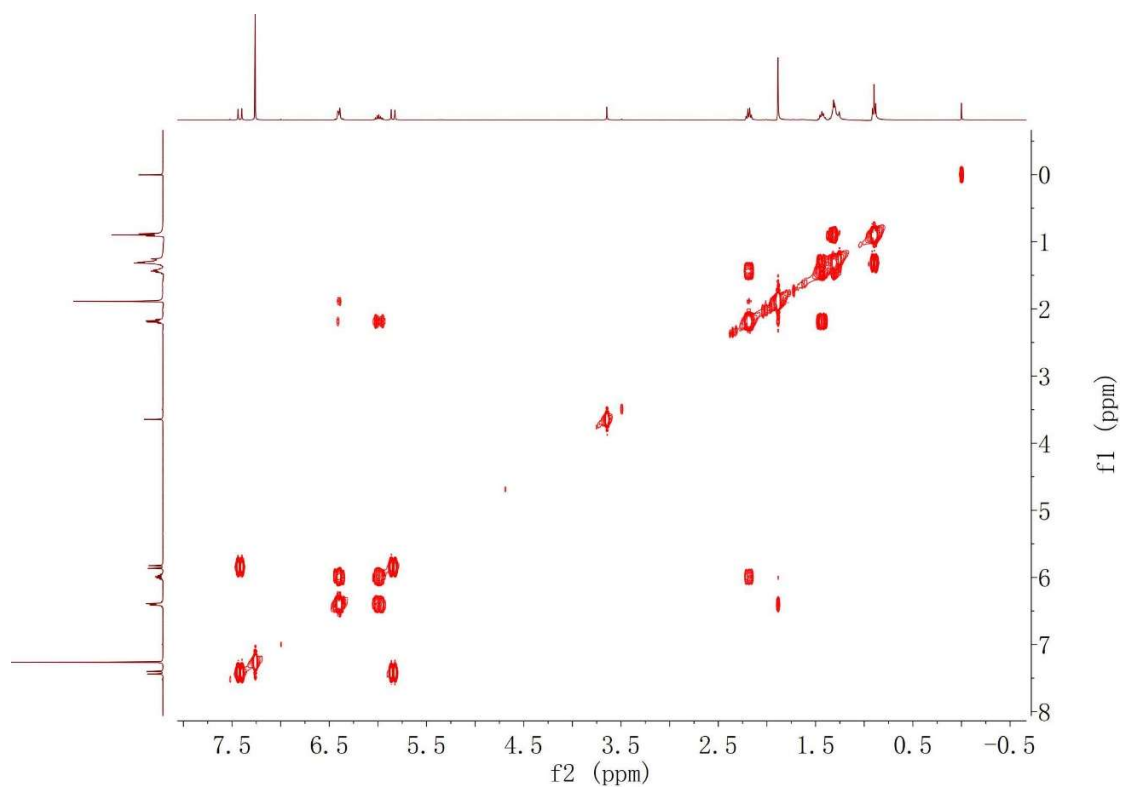

**Figure S48.**  $^1\text{H}$ - $^1\text{H}$  COSY spectrum of compound **2** in  $\text{CDCl}_3$ .

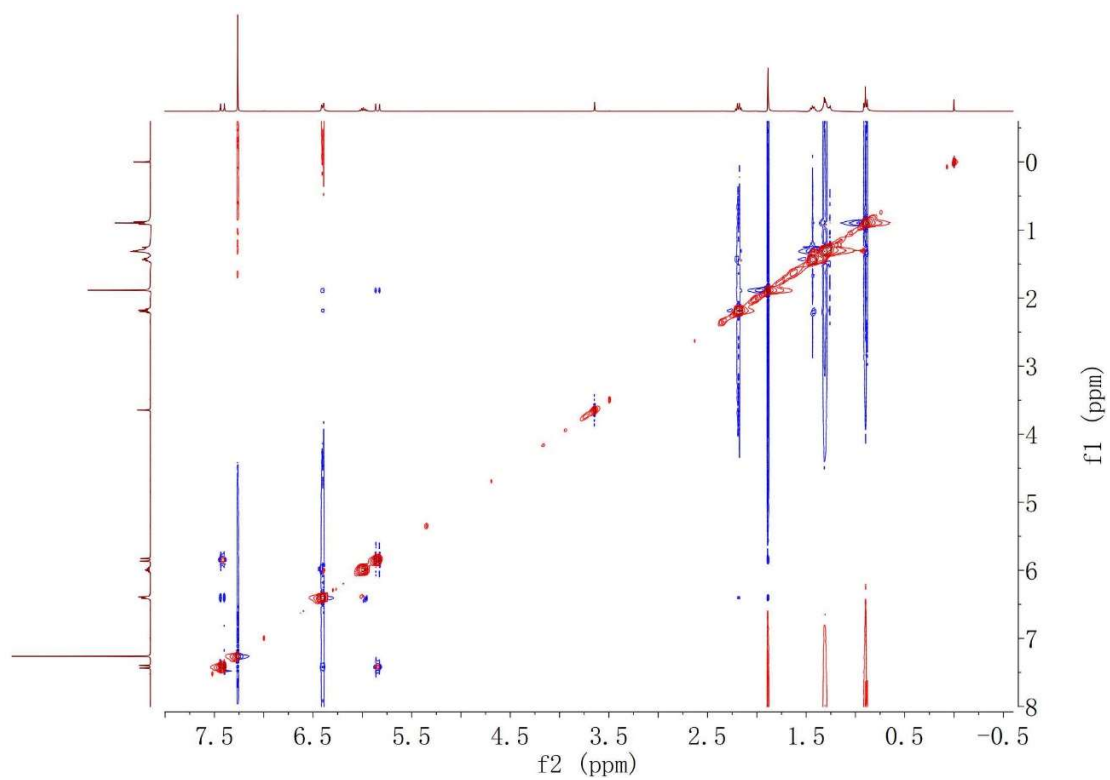

**Figure S49.**  $^1\text{H}$ - $^1\text{H}$  NOESY spectrum of compound **2** in  $\text{CDCl}_3$ .

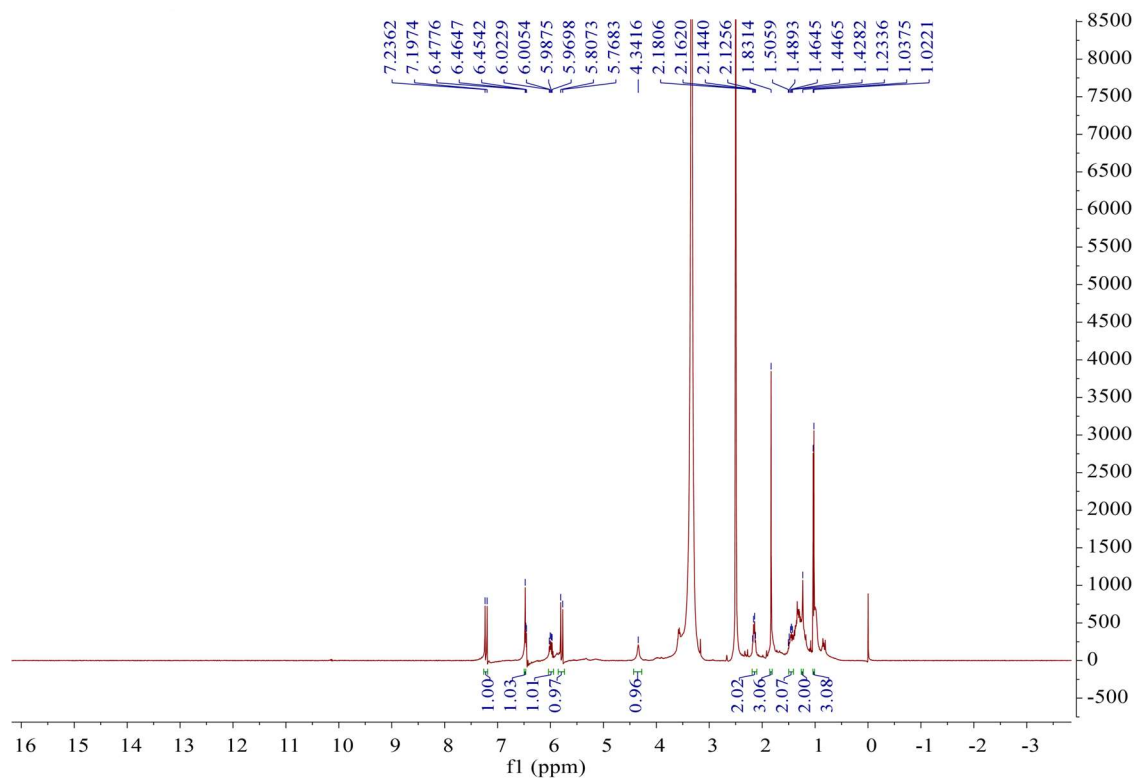

**Figure S50.**  $^1\text{H}$  NMR spectrum of compound **3** in  $\text{DMSO-}d_6$  (400 MHz).

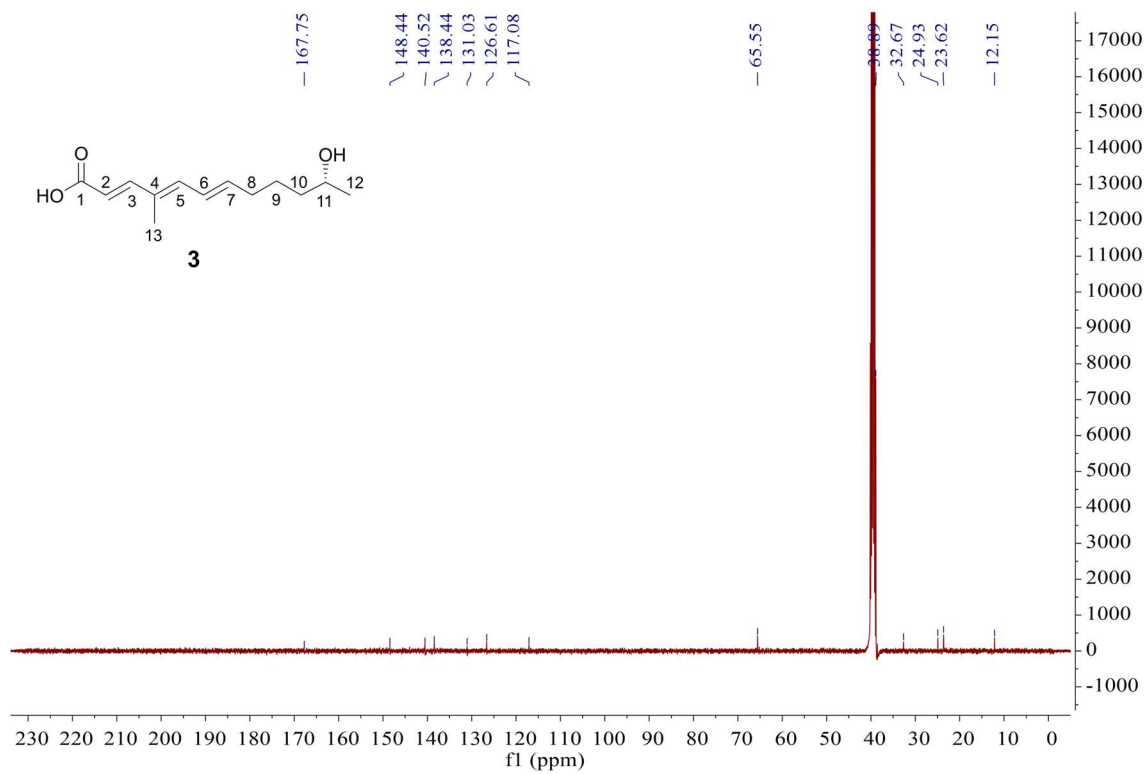

**Figure S51.**  $^{13}\text{C}$  NMR spectrum of compound **3** in  $\text{DMSO-}d_6$  (100 MHz).



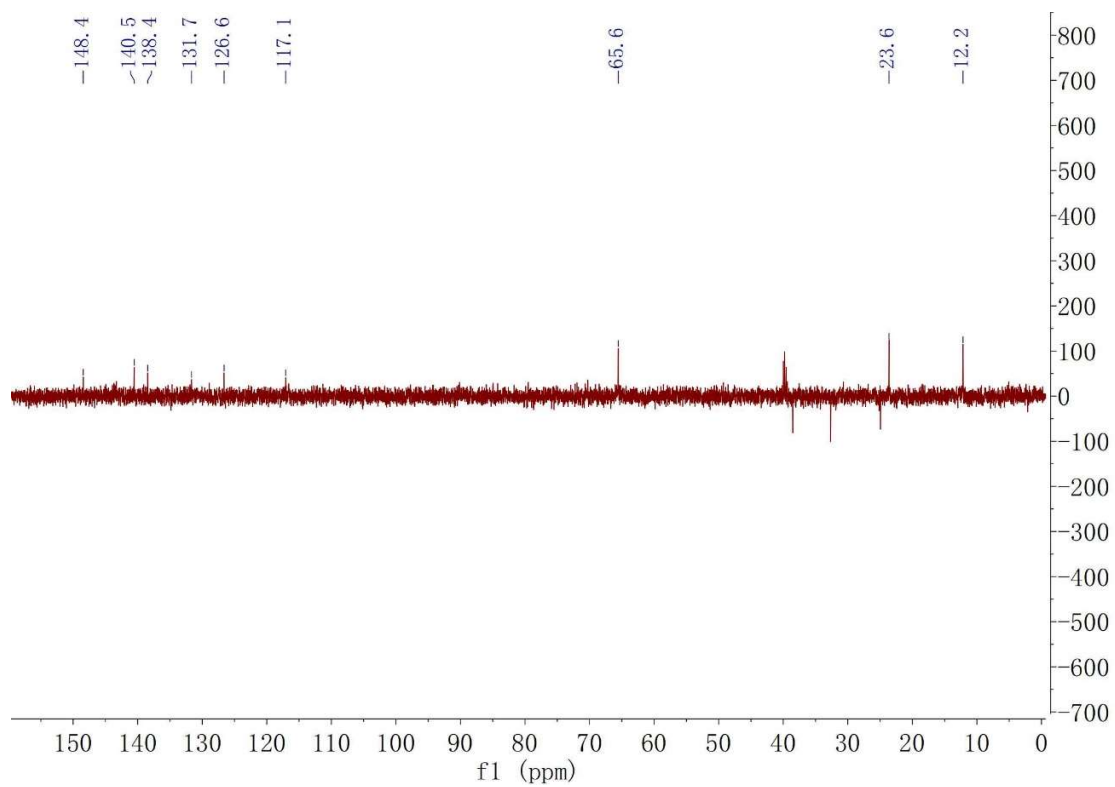

**Figure S52.** DEPT-135° spectrum of compound **3** in DMSO-*d*<sub>6</sub>.

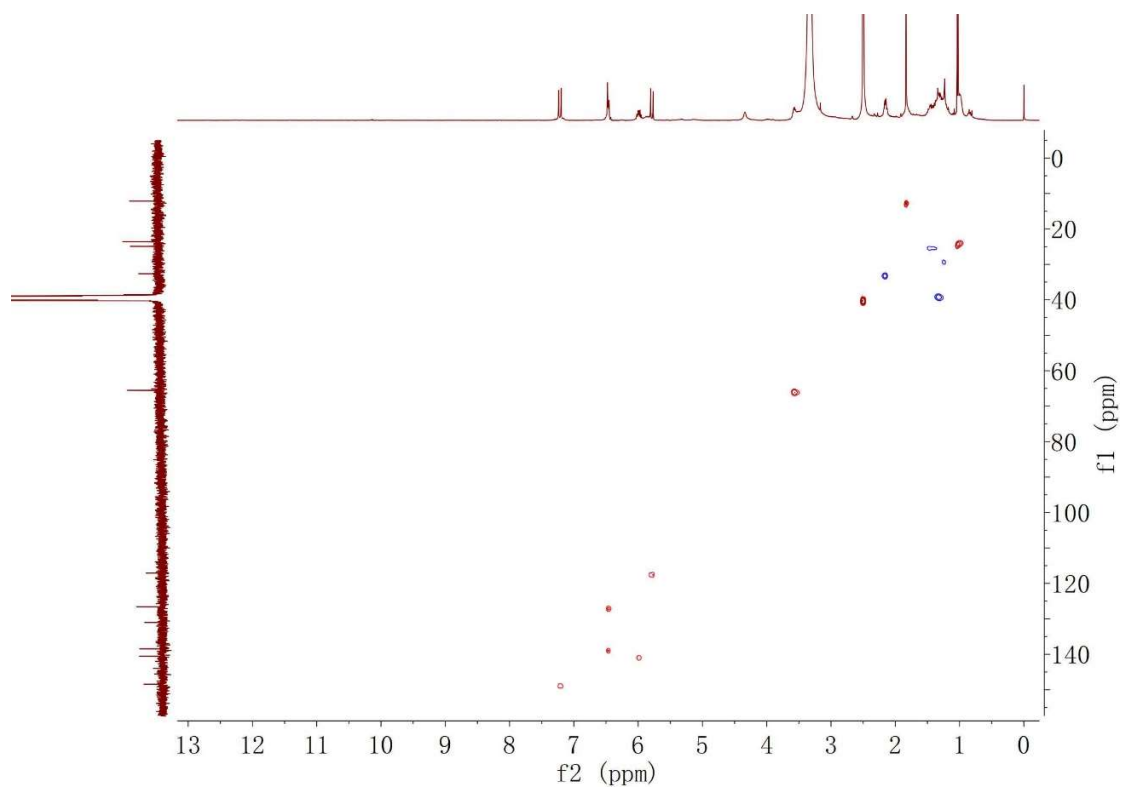

**Figure S53.** HSQC spectrum of compound **3** in DMSO-*d*<sub>6</sub>.

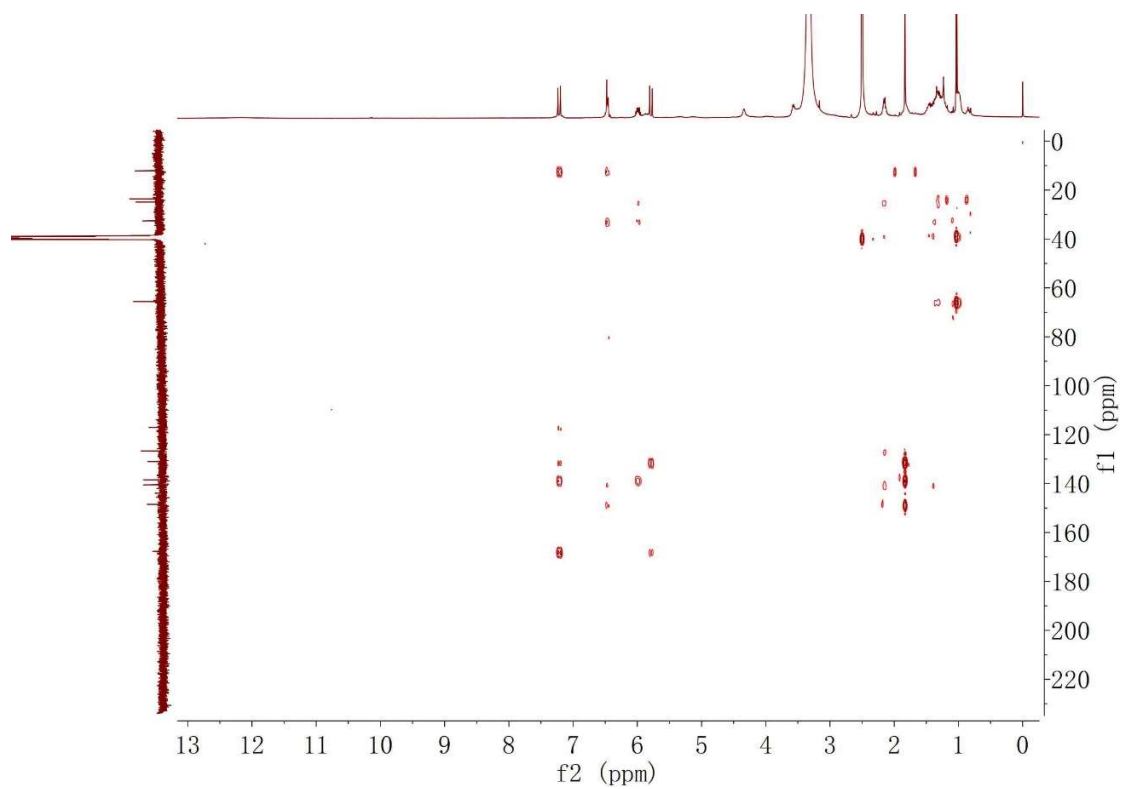

**Figure S54.** HMBC spectrum of compound **3** in DMSO-*d*<sub>6</sub>.

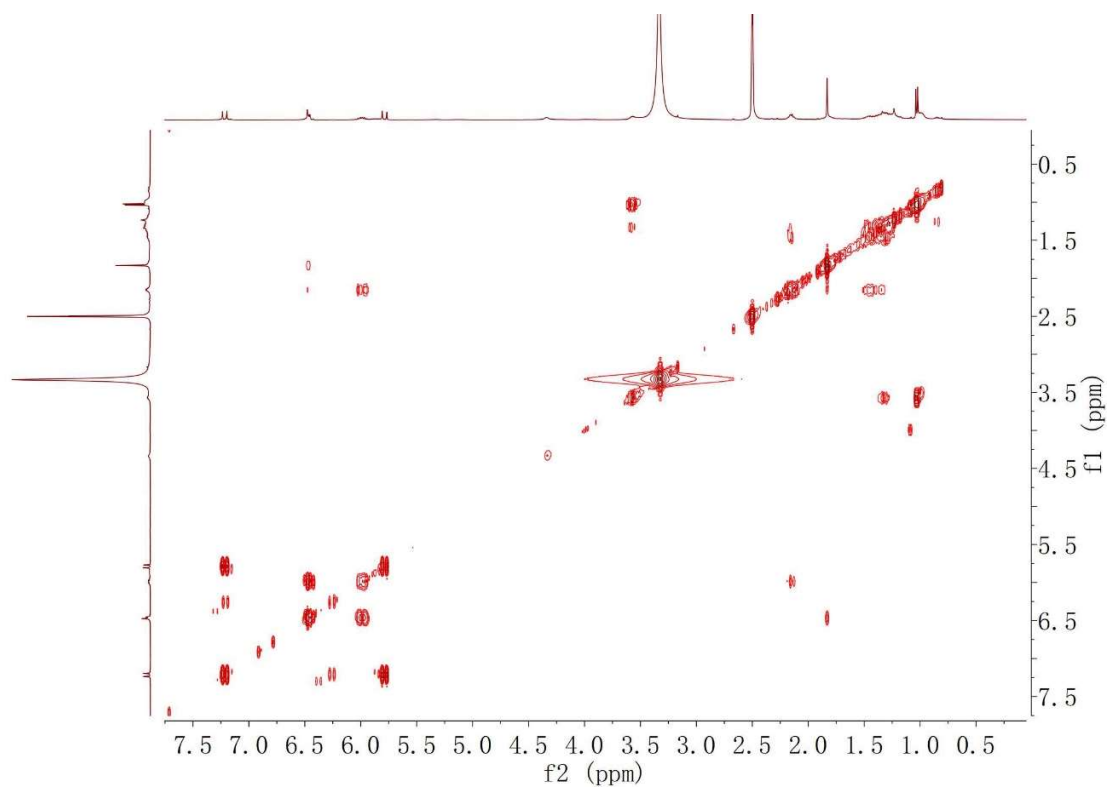

**Figure S55.**  $^1\text{H}$ - $^1\text{H}$  COSY spectrum of compound **3** in  $\text{DMSO-}d_6$ .

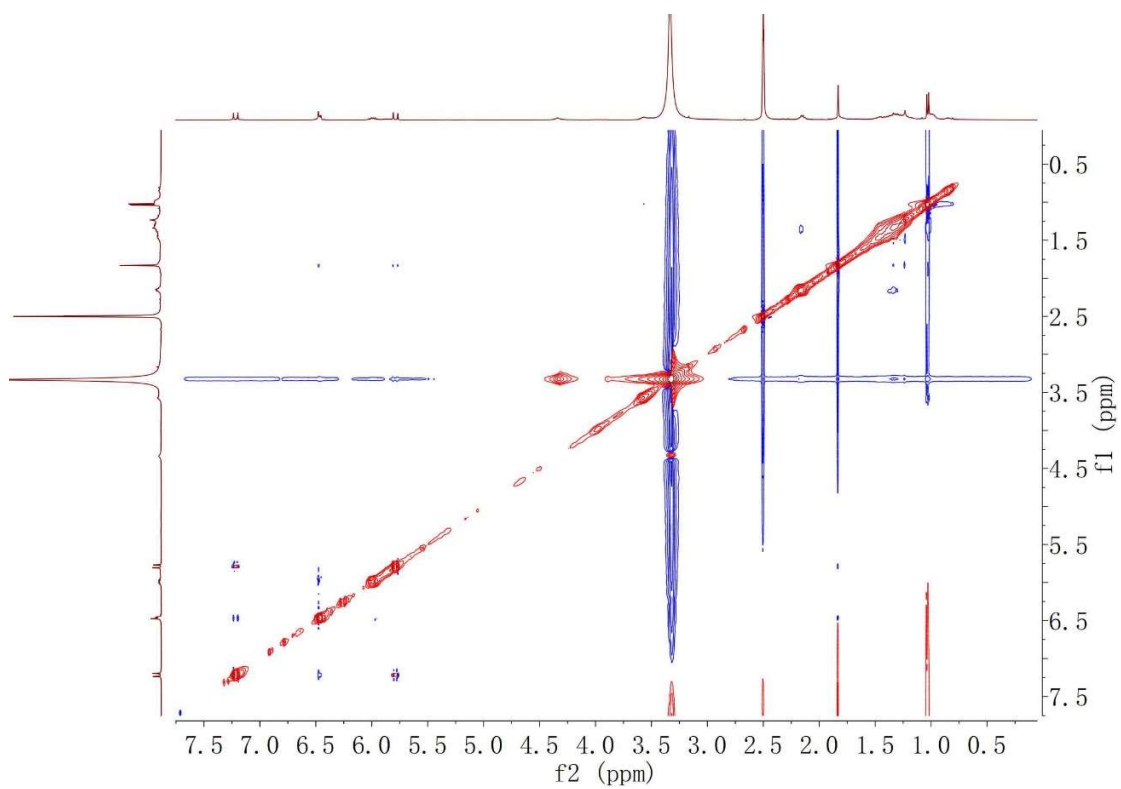

**Figure S56.**  $^1\text{H}$ - $^1\text{H}$  NOESY spectrum of compound **3** in  $\text{DMSO-}d_6$ .

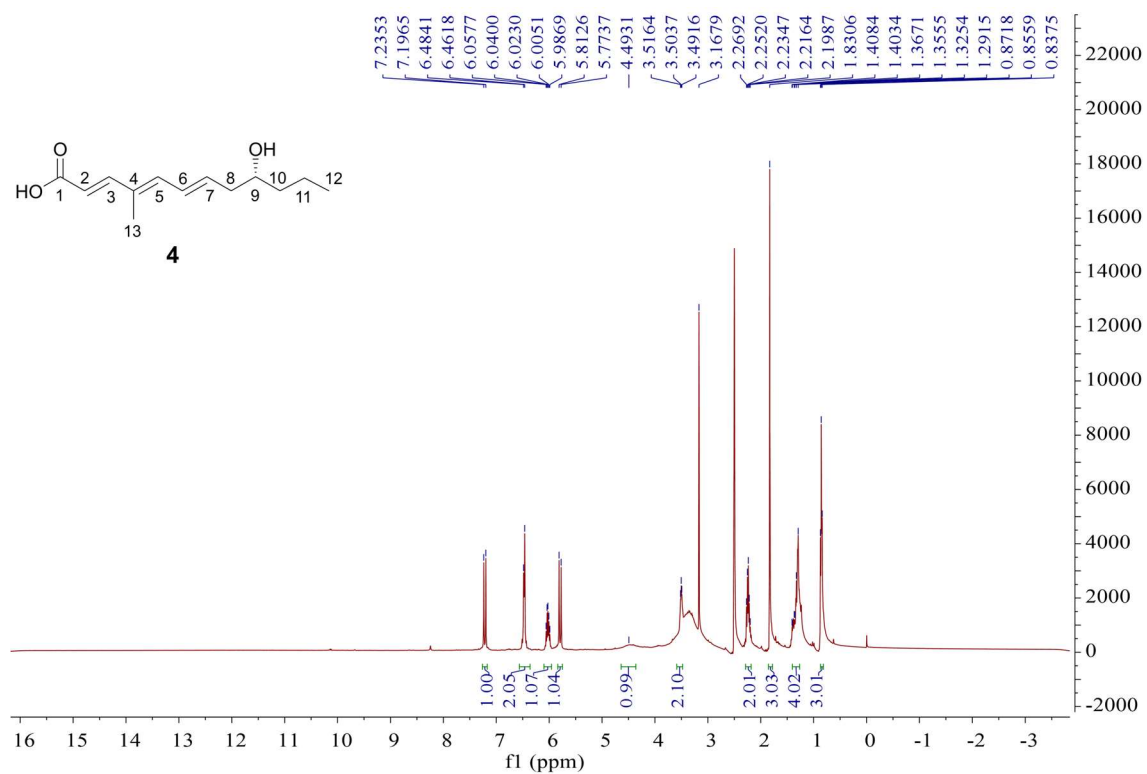

**Figure S57.**  $^1\text{H}$  NMR spectrum of compound 4 in  $\text{DMSO-}d_6$  (400 MHz).

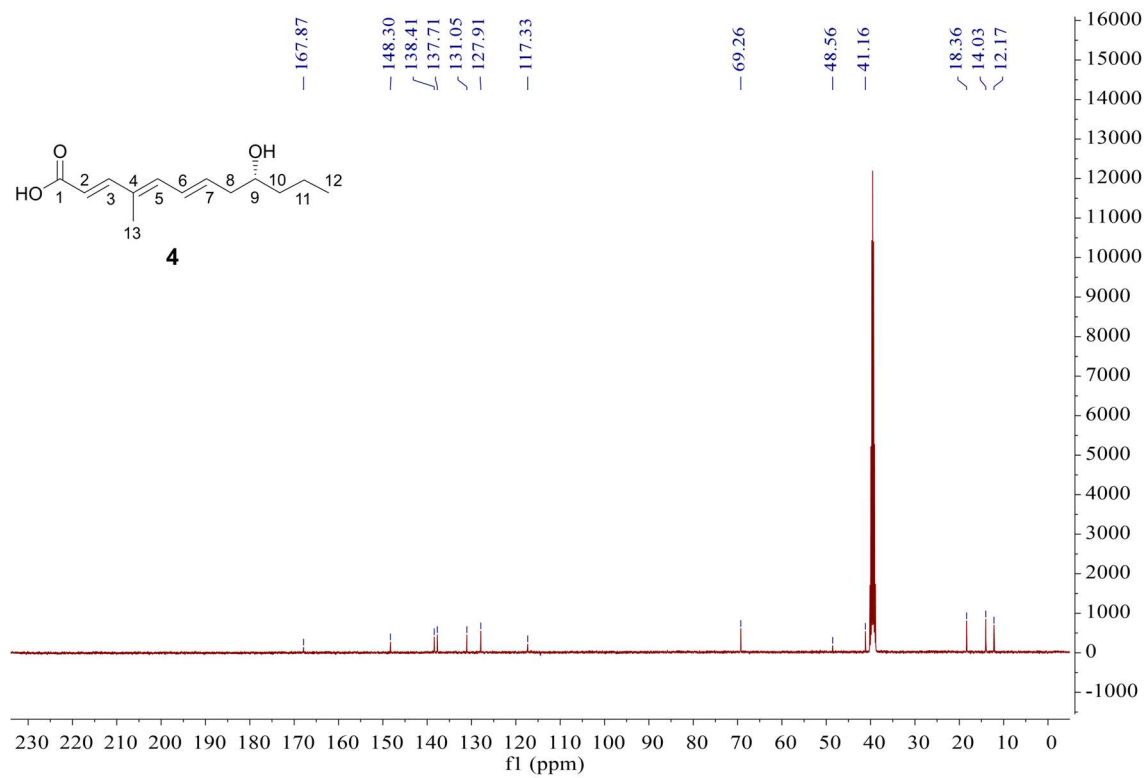

**Figure S58.**  $^{13}\text{C}$  NMR spectrum of compound **4** in  $\text{DMSO-}d_6$  (100 MHz).

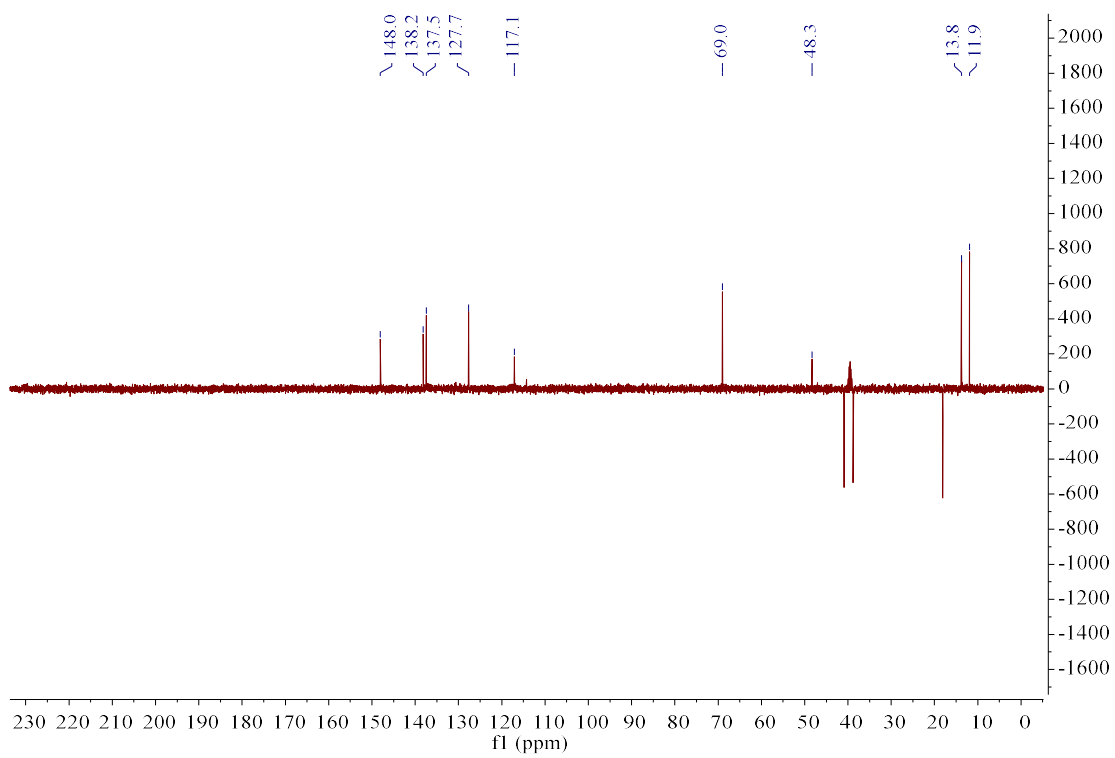

**Figure S59.** DEPT-135° spectrum of compound **4** in DMSO- $d_6$ .



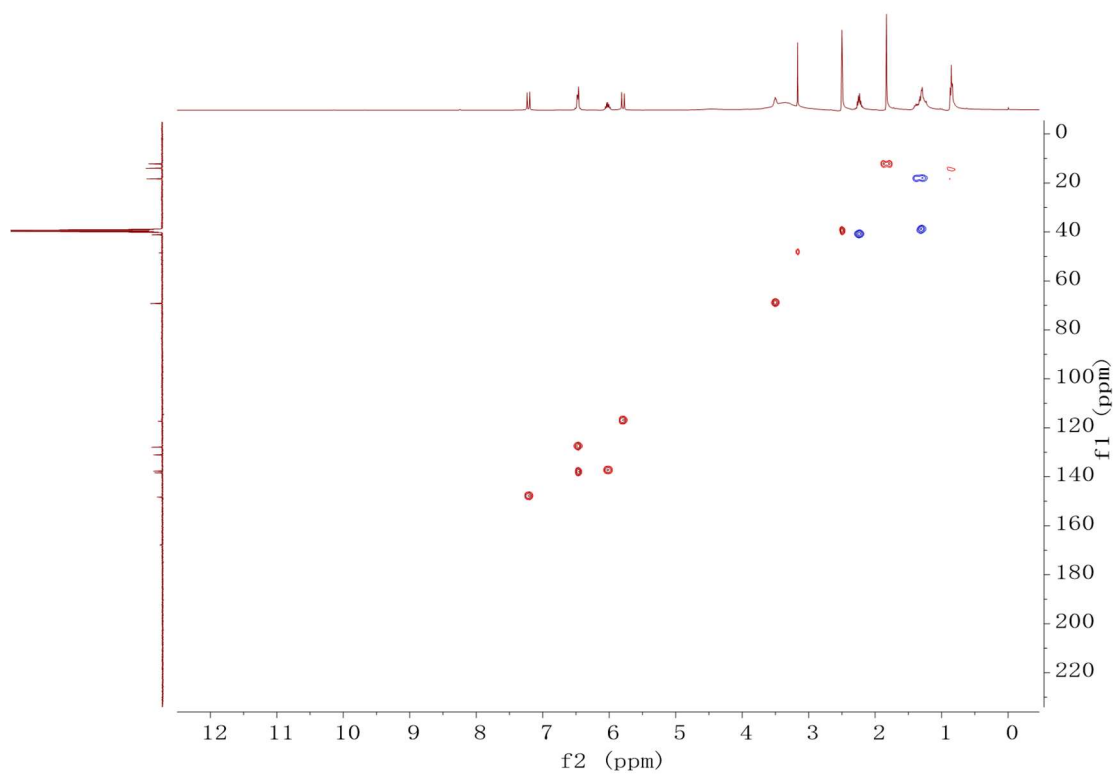

**Figure S60.** HSQC spectrum of compound **4** in DMSO-*d*<sub>6</sub>.

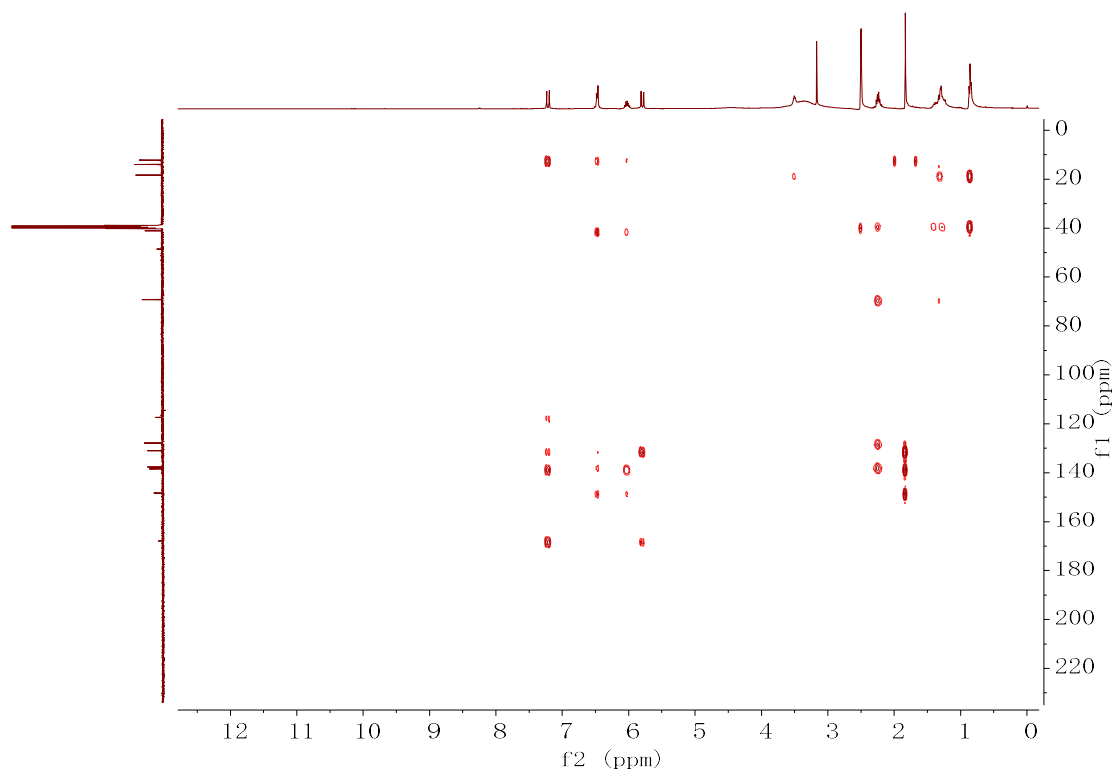

**Figure S61.** HMBC spectrum of compound **4** in DMSO-*d*<sub>6</sub>.

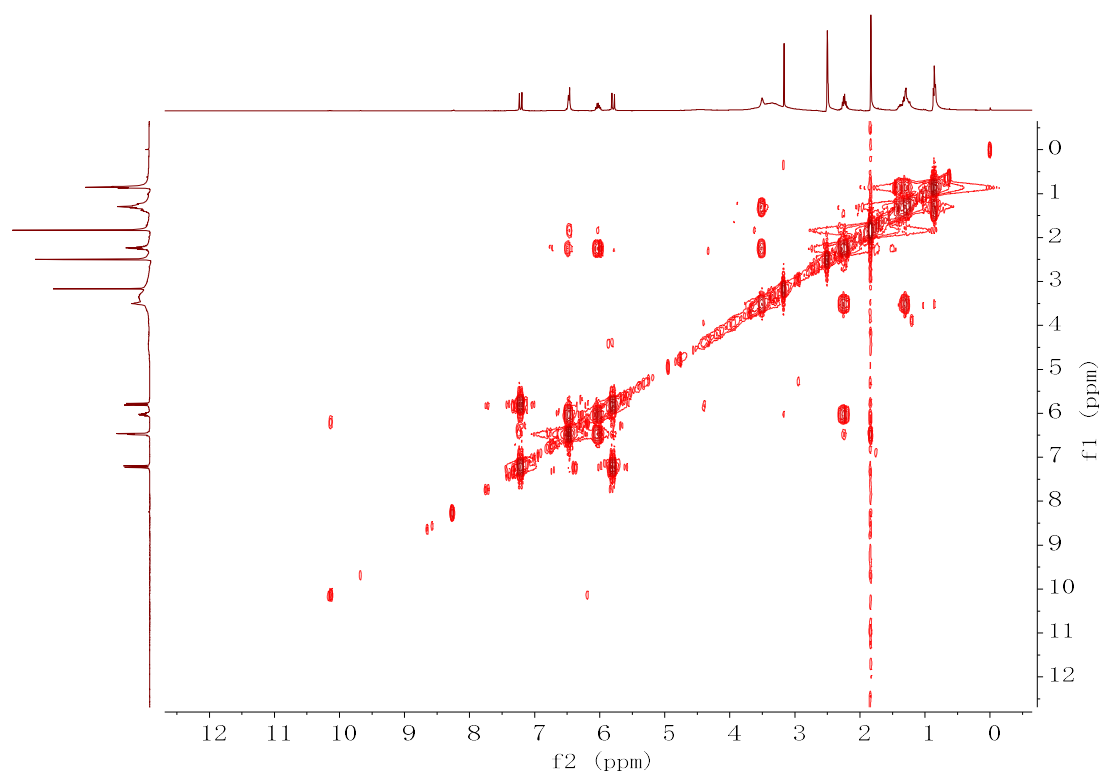

**Figure S62.**  $^1\text{H}$ - $^1\text{H}$  COSY spectrum of compound **4** in  $\text{DMSO-}d_6$ .

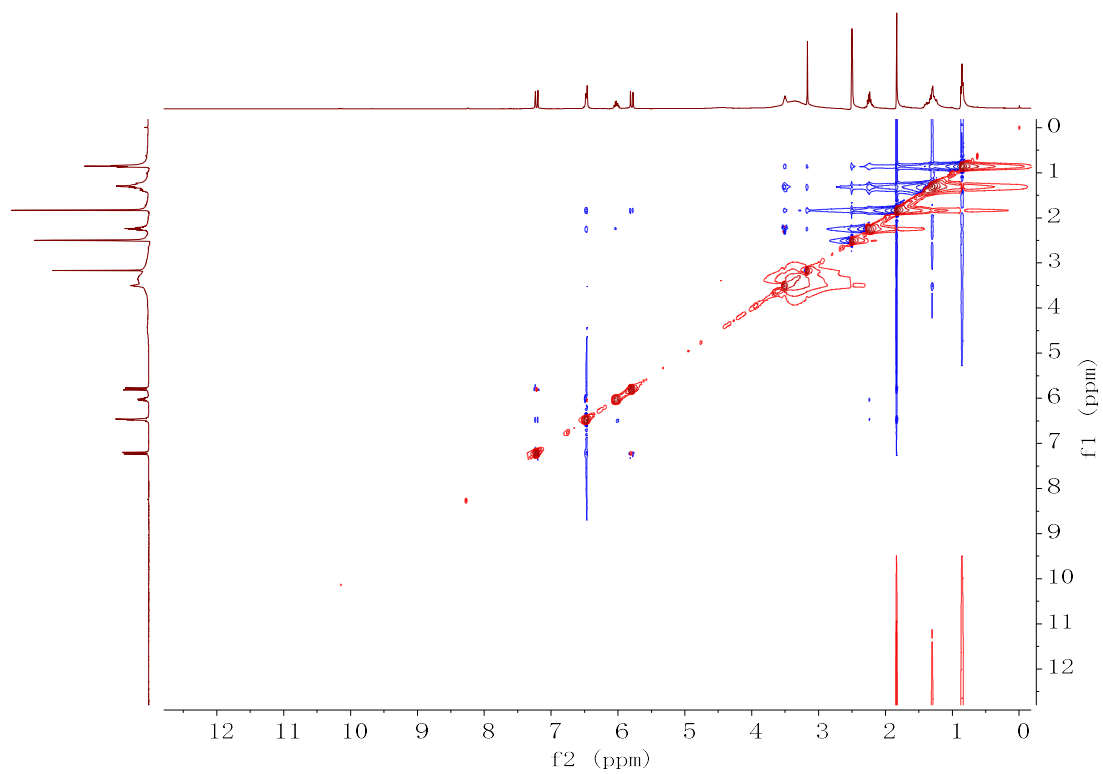

**Figure S63.**  $^1\text{H}$ - $^1\text{H}$  NOESY spectrum of compound **4** in  $\text{DMSO-}d_6$ .

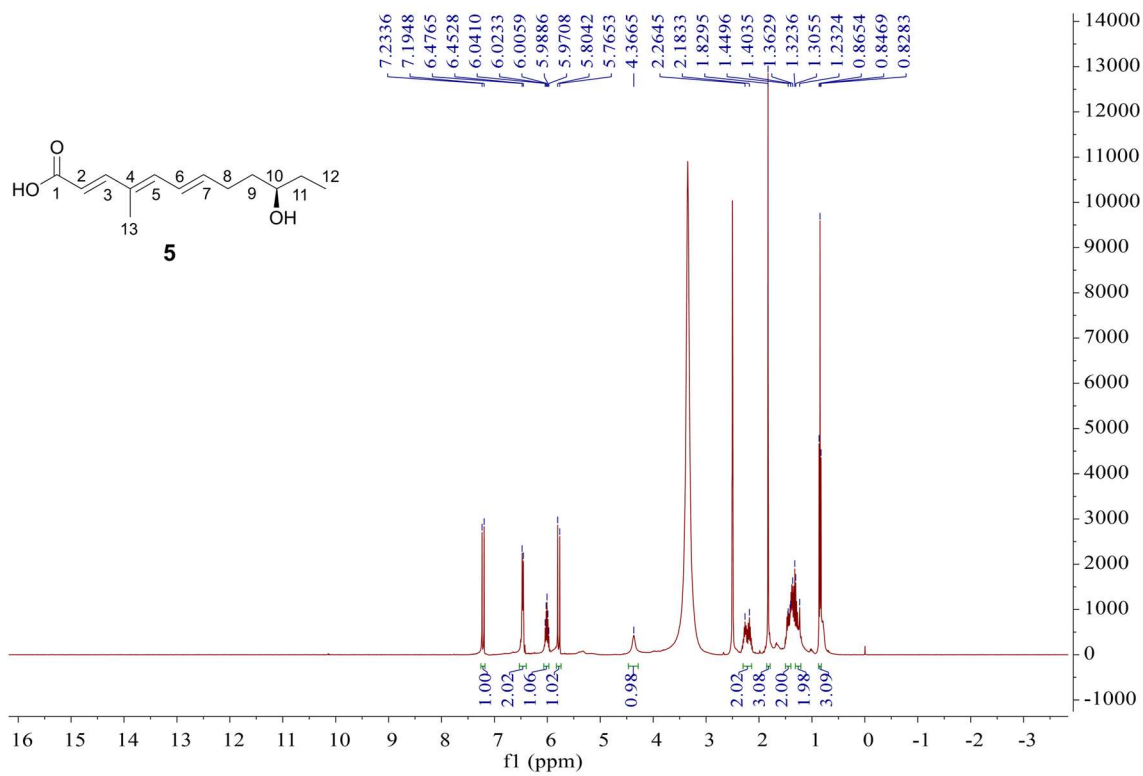

**Figure S64.**  $^1\text{H}$  NMR spectrum of compound **5** in  $\text{DMSO-}d_6$  (400 MHz).

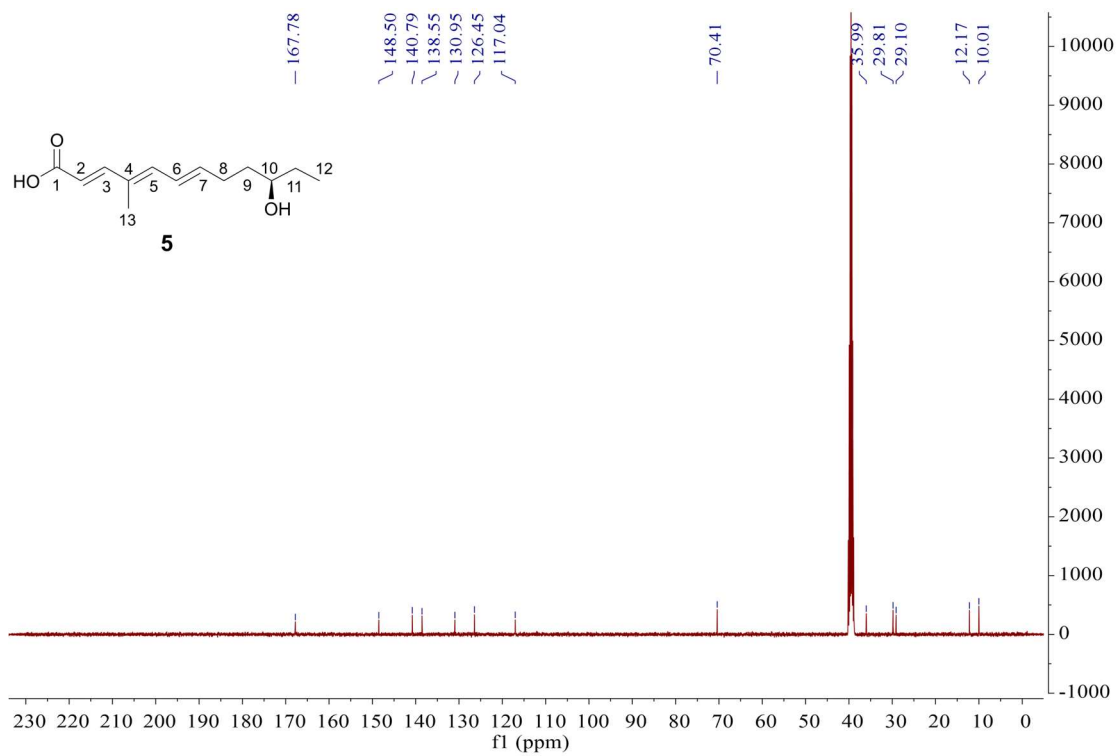

**Figure S65.**  $^{13}\text{C}$  NMR spectrum of compound **5** in DMSO- $d_6$  (100 MHz).

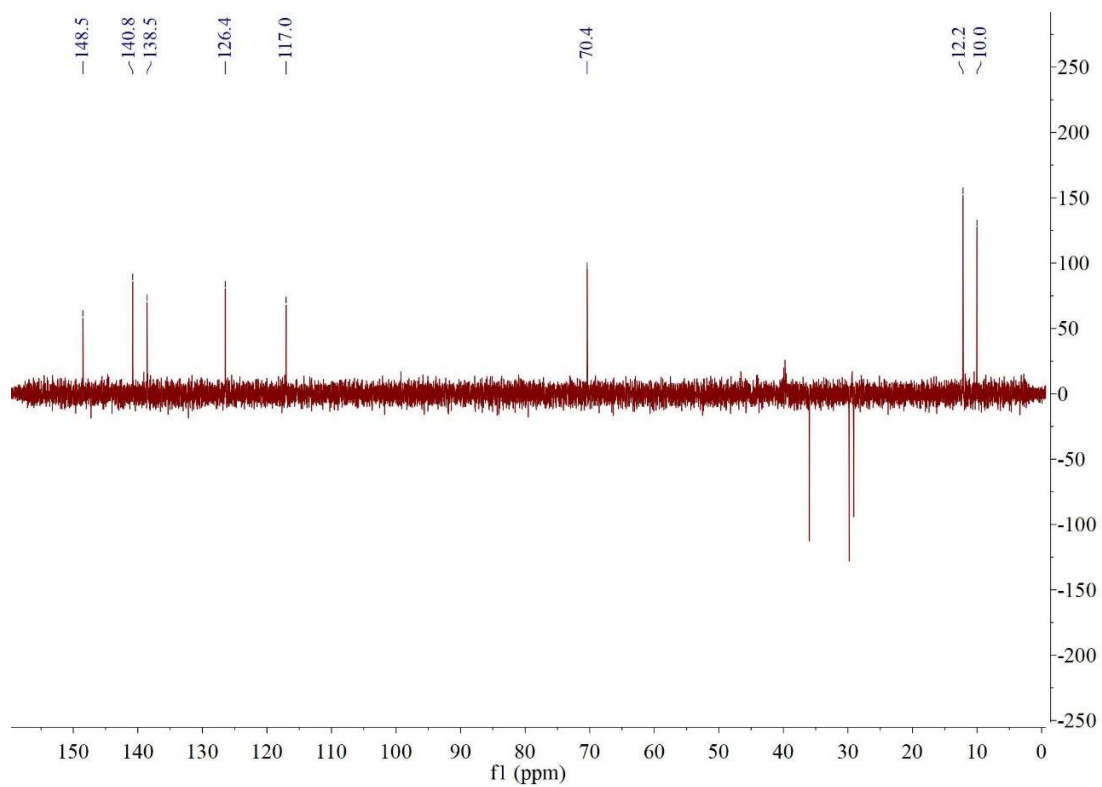

**Figure S66.** DEPT-135° spectrum of compound **5** in DMSO-*d*<sub>6</sub>.

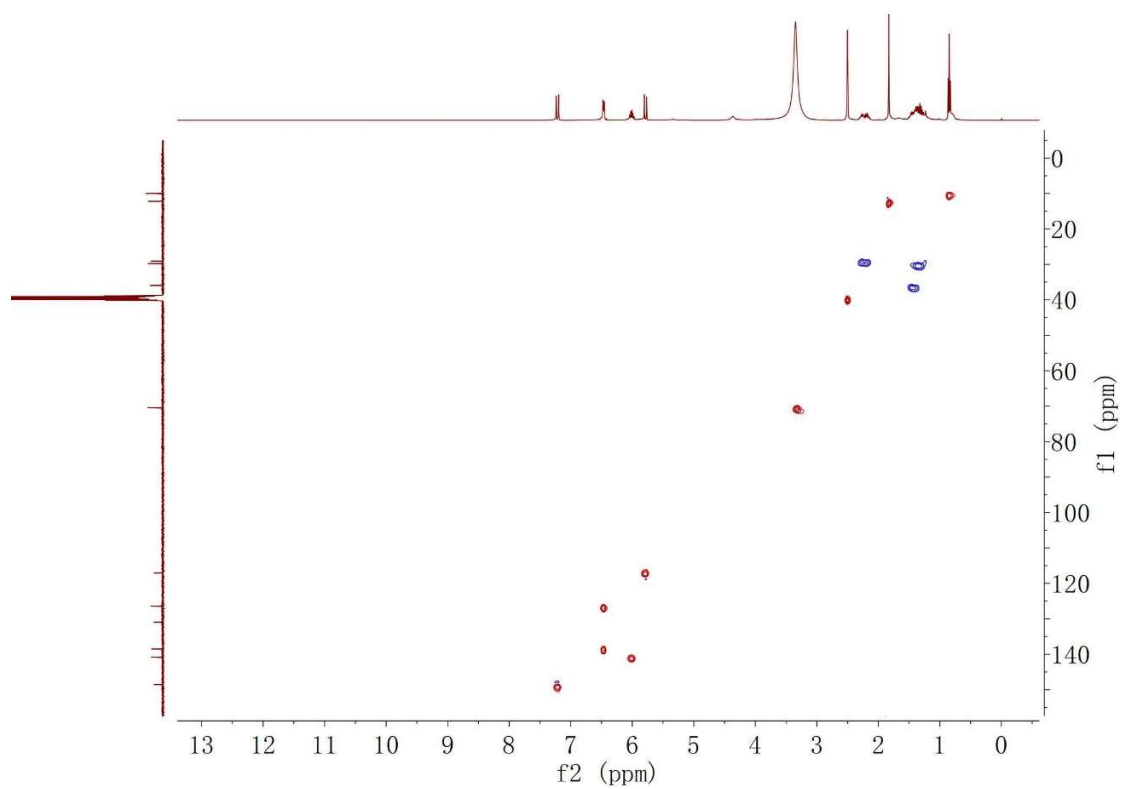

**Figure S67.** HSQC spectrum of compound **5** in DMSO- $d_6$ .



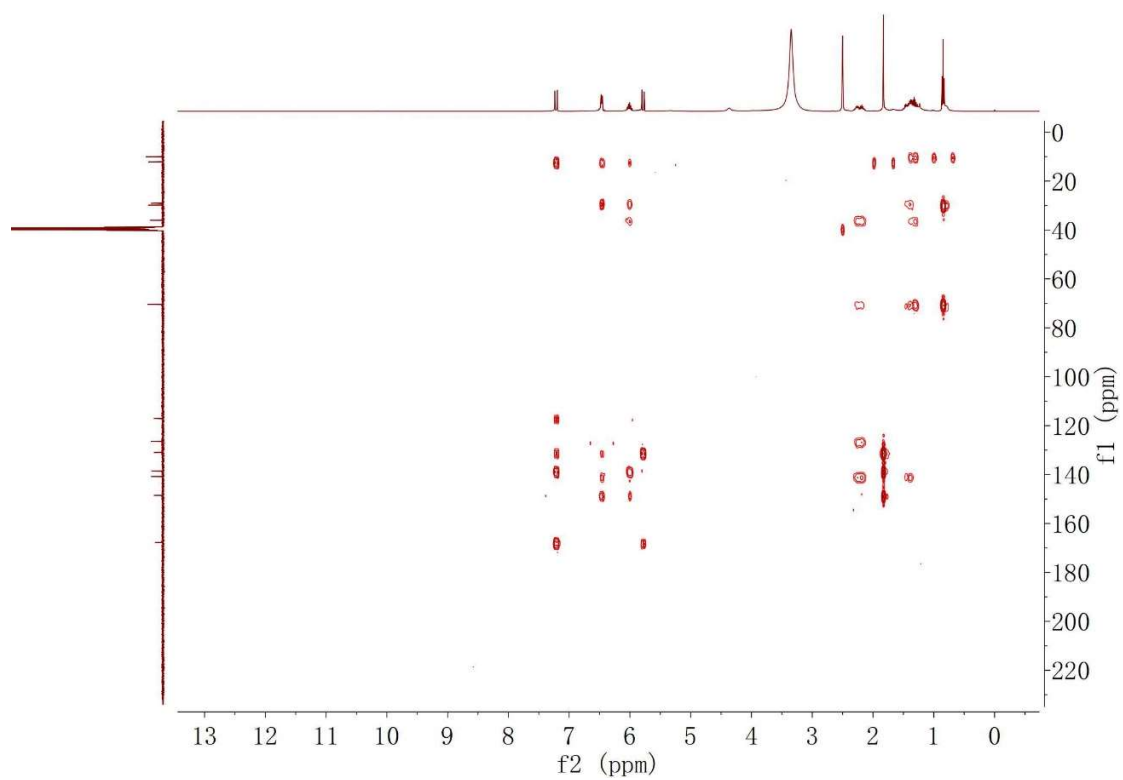

**Figure S68.** HMBC spectrum of compound **5** in DMSO-*d*<sub>6</sub>.

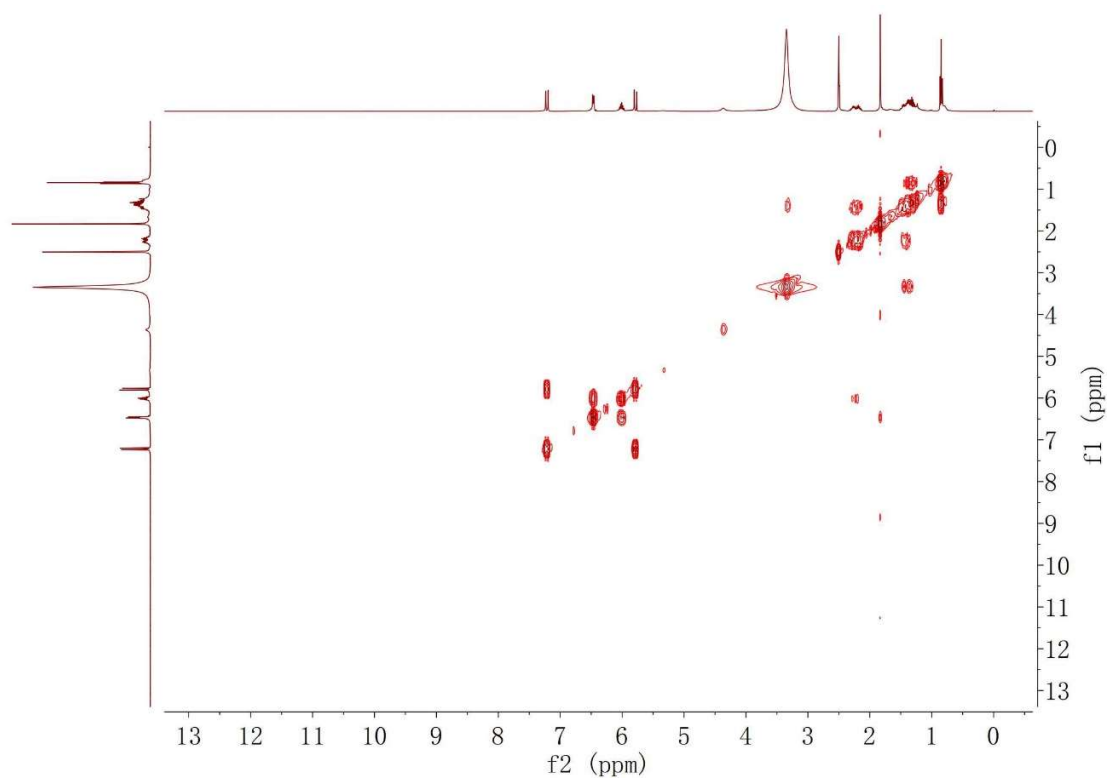

**Figure S69.**  $^1\text{H}$ - $^1\text{H}$  COSY spectrum of compound **5** in  $\text{DMSO-}d_6$ .

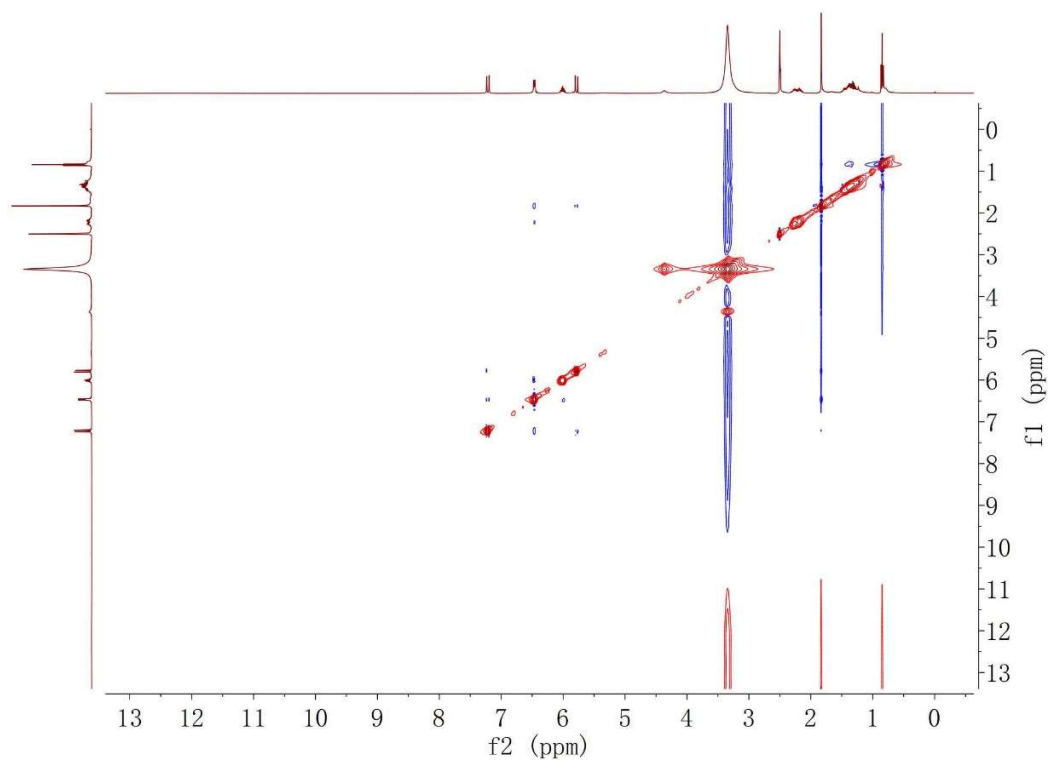

**Figure S70.**  $^1\text{H}$ - $^1\text{H}$  NOESY spectrum of compound **5** in  $\text{DMSO-}d_6$ .

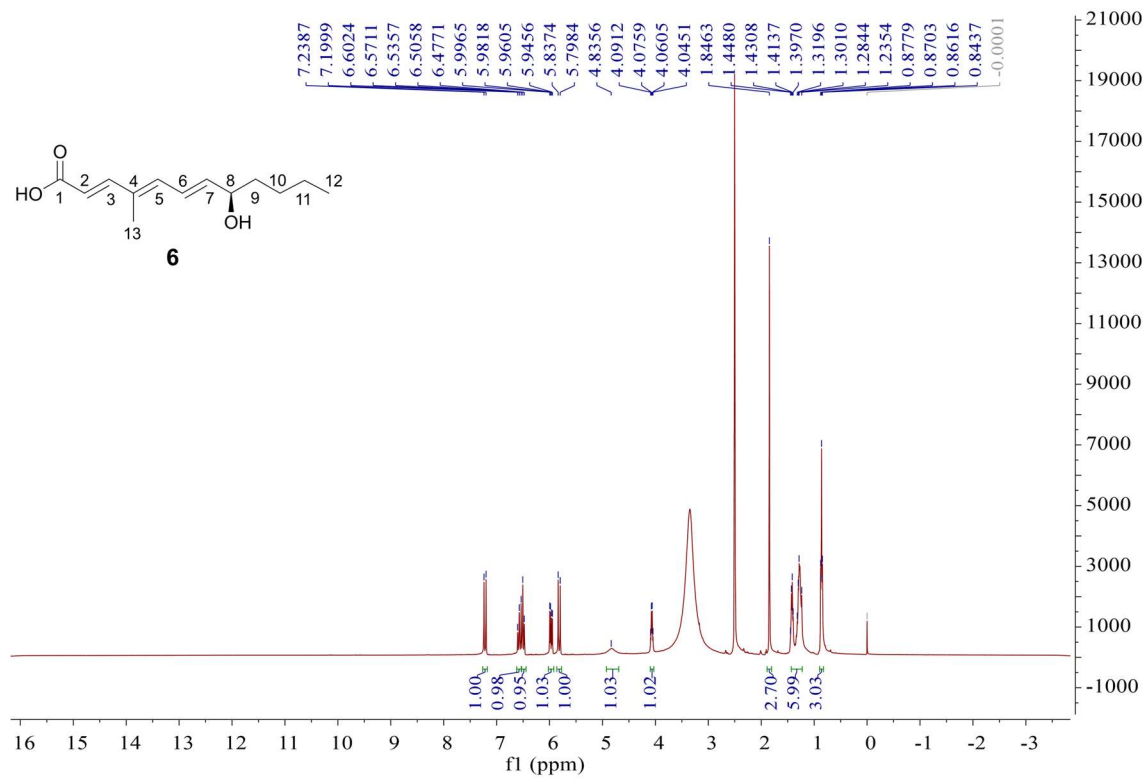

**Figure S71.**  $^1\text{H NMR}$  spectrum of compound **6** in  $\text{DMSO-}d_6$  (400 MHz).

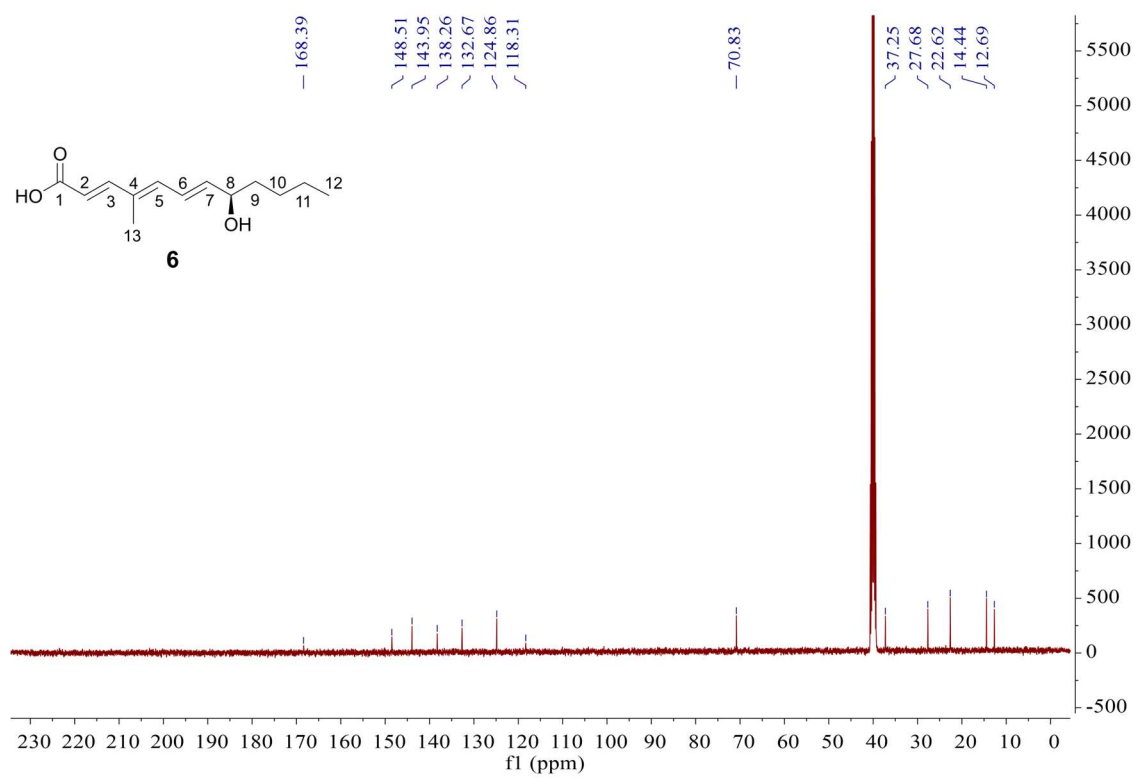

**Figure S72.**  $^{13}\text{C}$  NMR spectrum of compound **6** in  $\text{DMSO-}d_6$  (100 MHz).

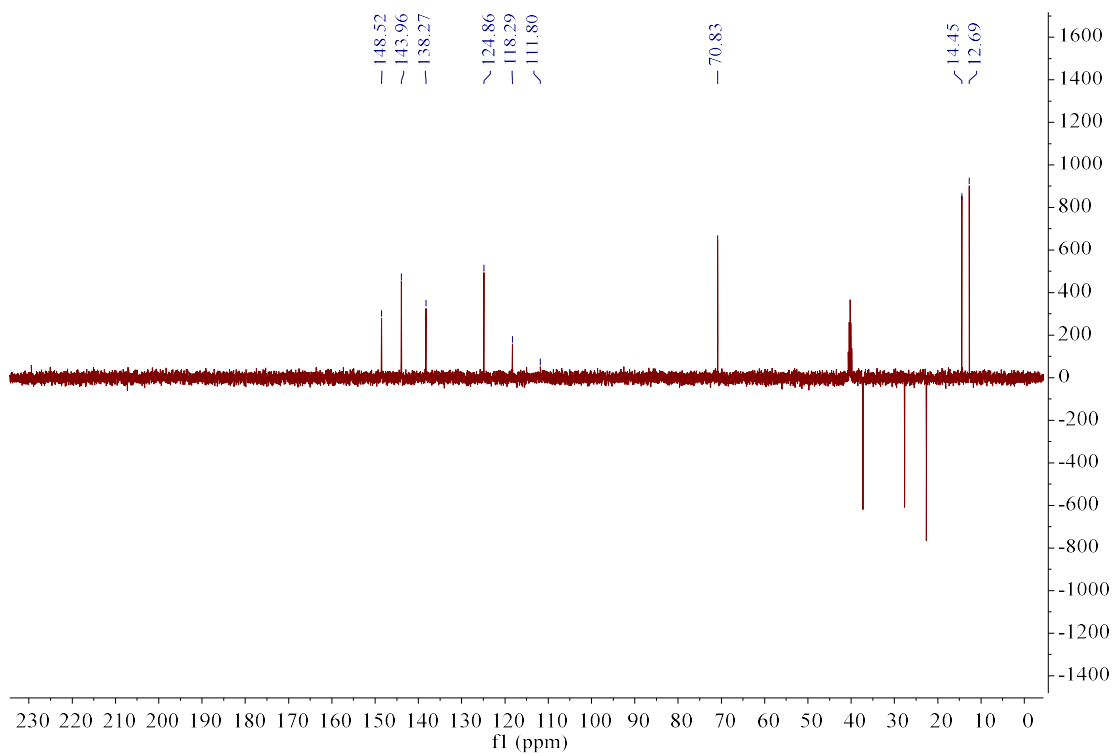

**Figure S73.** DEPT-135° spectrum of compound **6** in DMSO-*d*<sub>6</sub>.

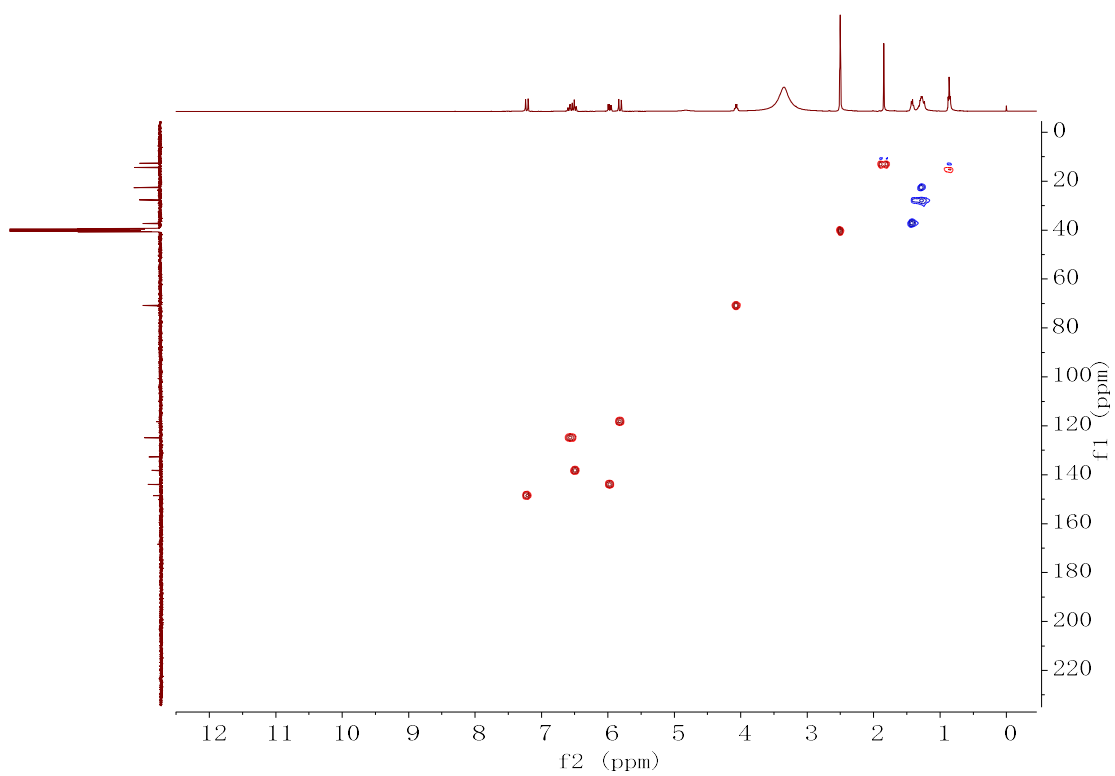

**Figure S74.** HSQC spectrum of compound **6** in DMSO-*d*<sub>6</sub>.

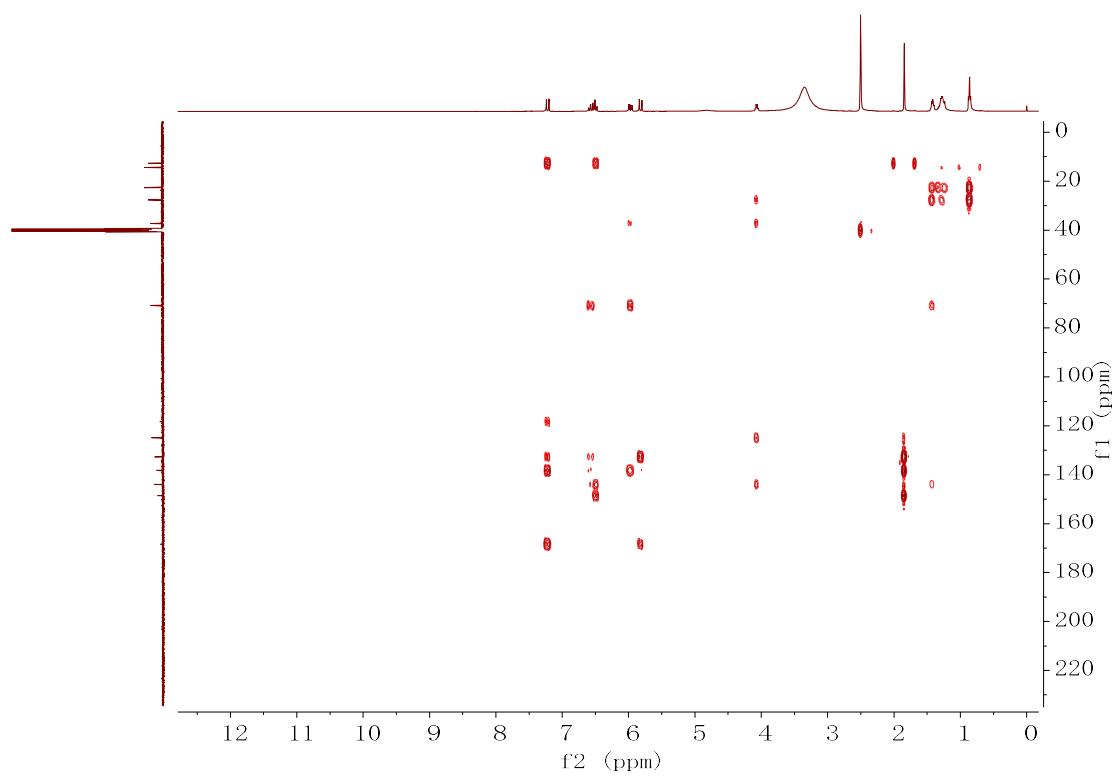

**Figure S75.** HMBC spectrum of compound **6** in DMSO- $d_6$ .



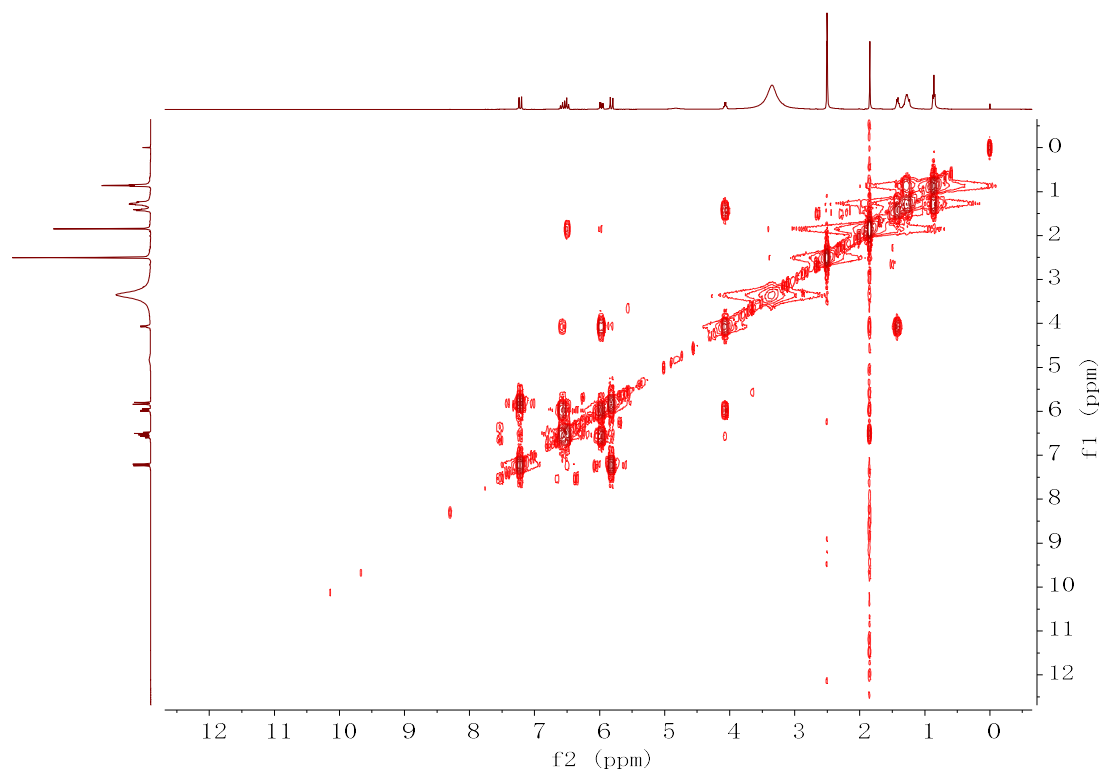

**Figure S76.**  $^1\text{H}$ - $^1\text{H}$  COSY spectrum of compound **6** in  $\text{DMSO-}d_6$ .

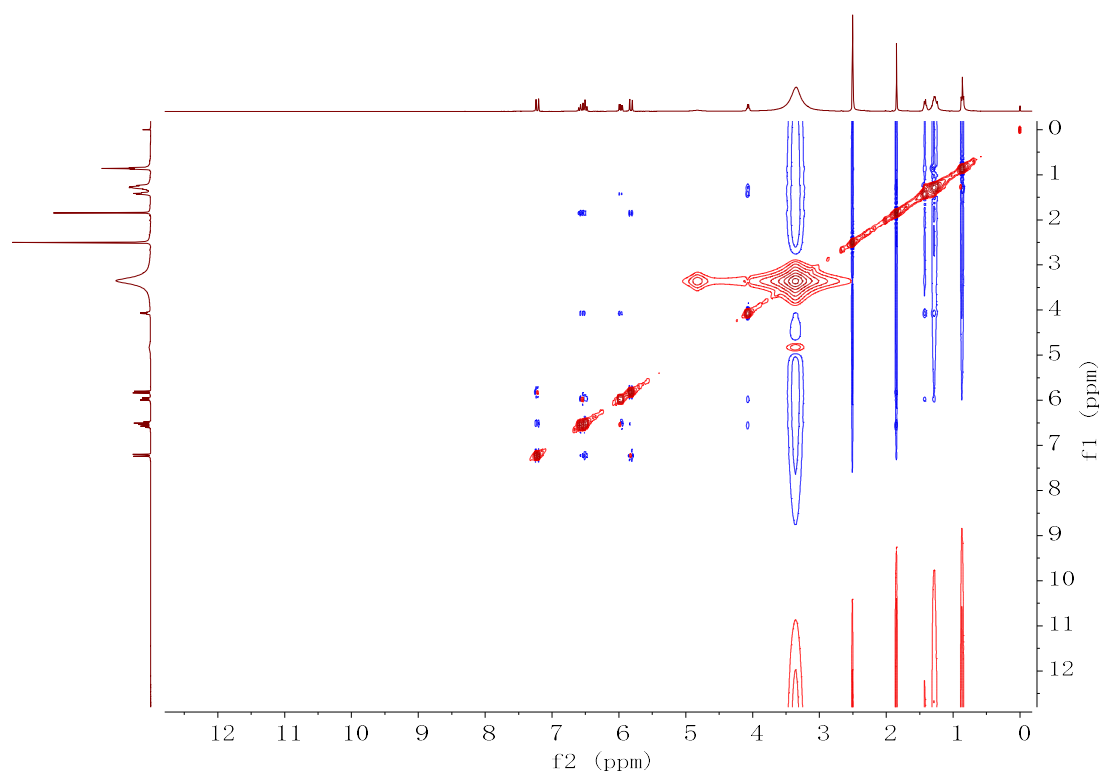

**Figure S77.**  $^1\text{H}$ - $^1\text{H}$  NOESY spectrum of compound **6** in  $\text{DMSO-}d_6$ .

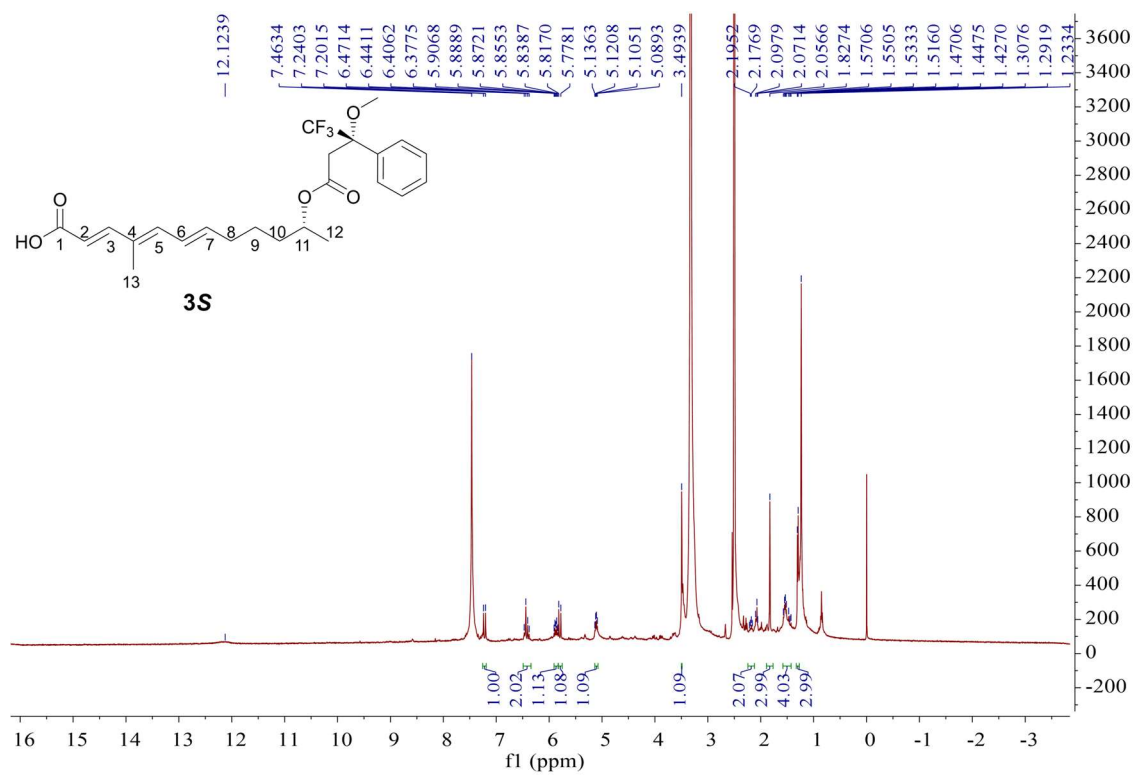

**Figure S78.** <sup>1</sup>H NMR spectrum of compound **3S** in DMSO-*d*<sub>6</sub> (400 MHz).

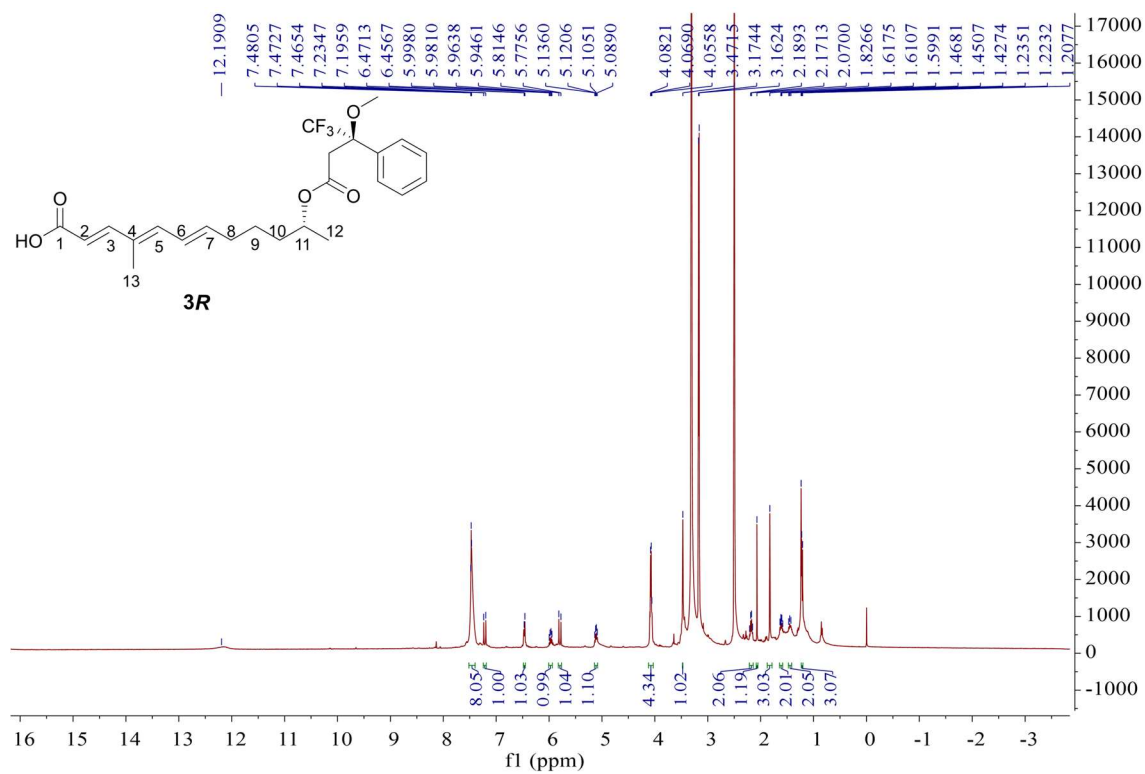

**Figure S79.** <sup>1</sup>H NMR spectrum of compound **3R** in DMSO-*d*<sub>6</sub> (400 MHz).

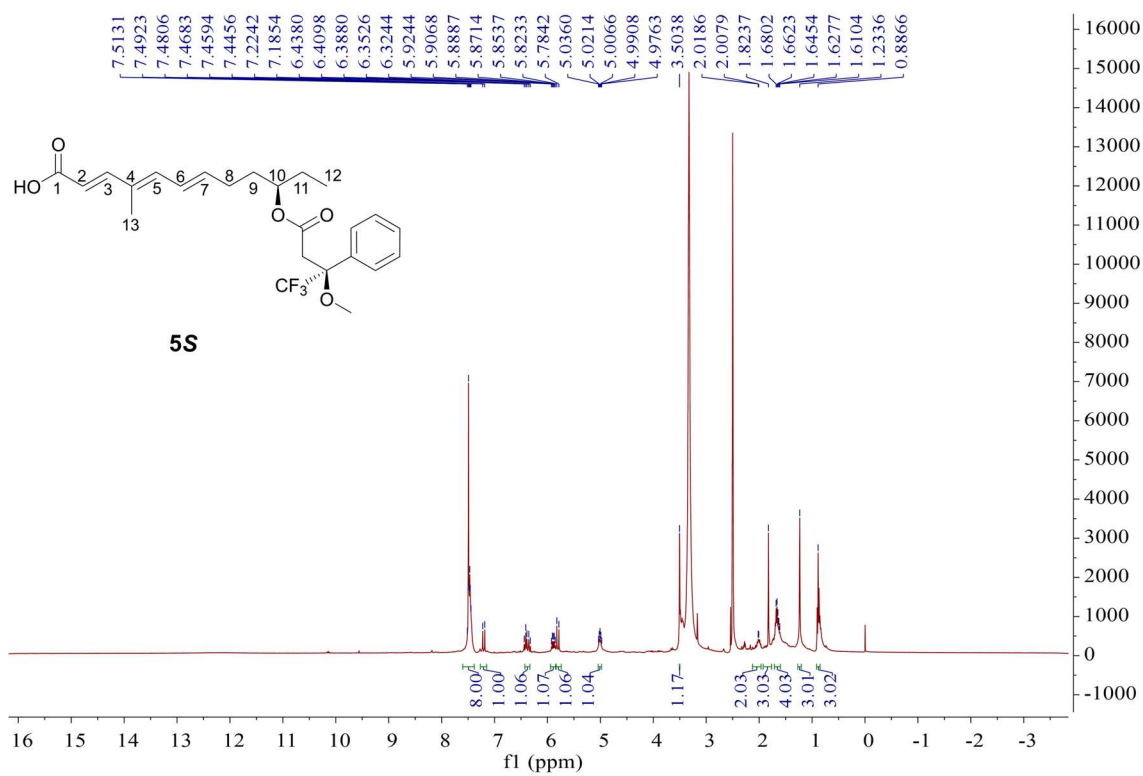

**Figure S80.** <sup>1</sup>H NMR spectrum of compound **5S** in DMSO-*d*<sub>6</sub> (400 MHz).

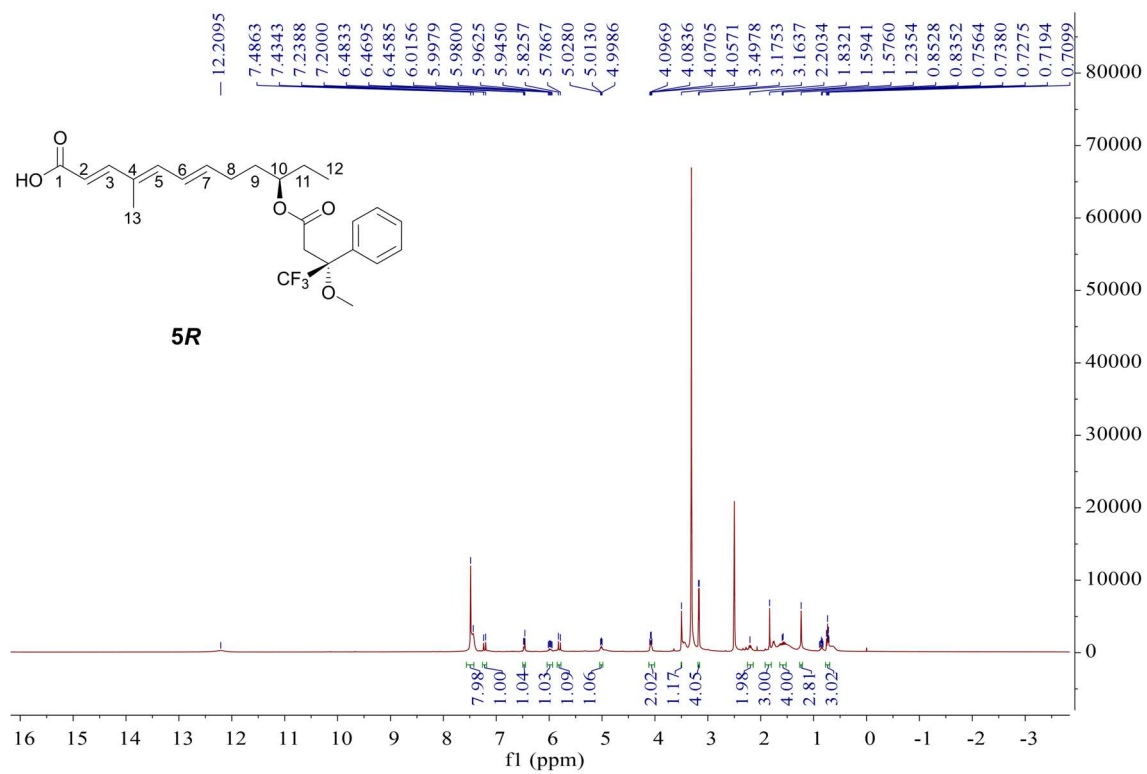

**Figure S81.** <sup>1</sup>H NMR spectrum of compound **5R** in DMSO-*d*<sub>6</sub> (400 MHz).

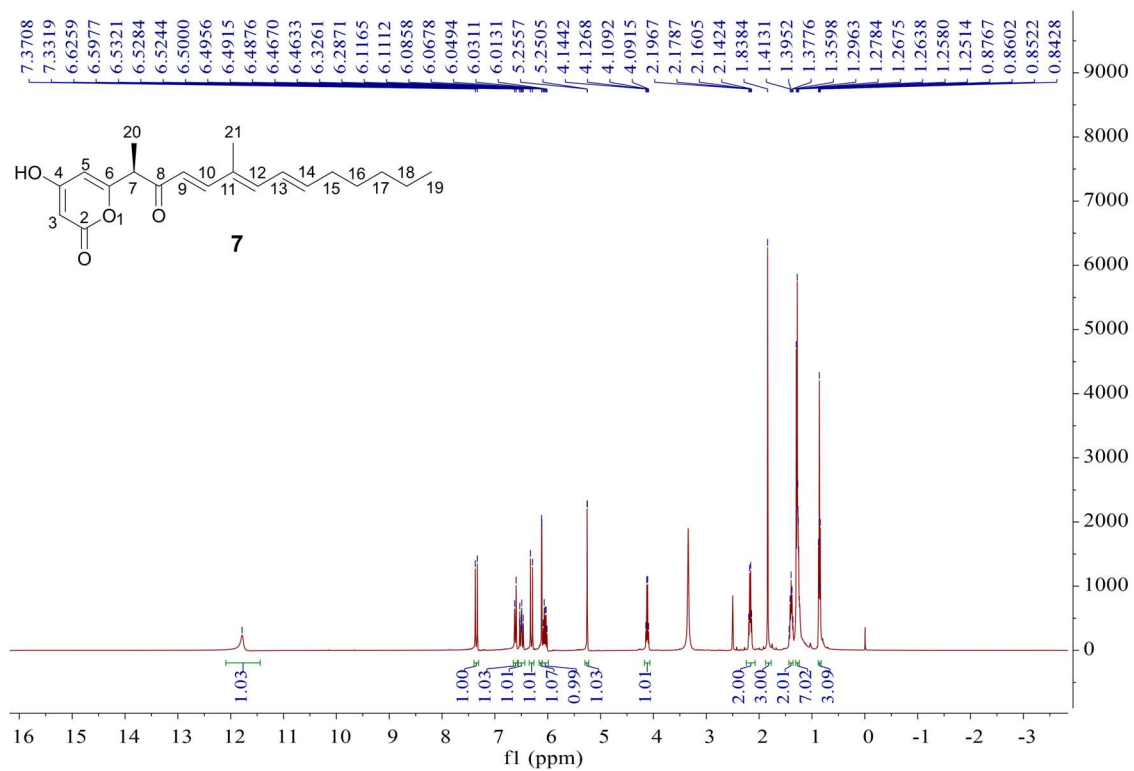

**Figure S82.** <sup>1</sup>H NMR spectrum of compound 7 in DMSO-*d*<sub>6</sub> (400 MHz).

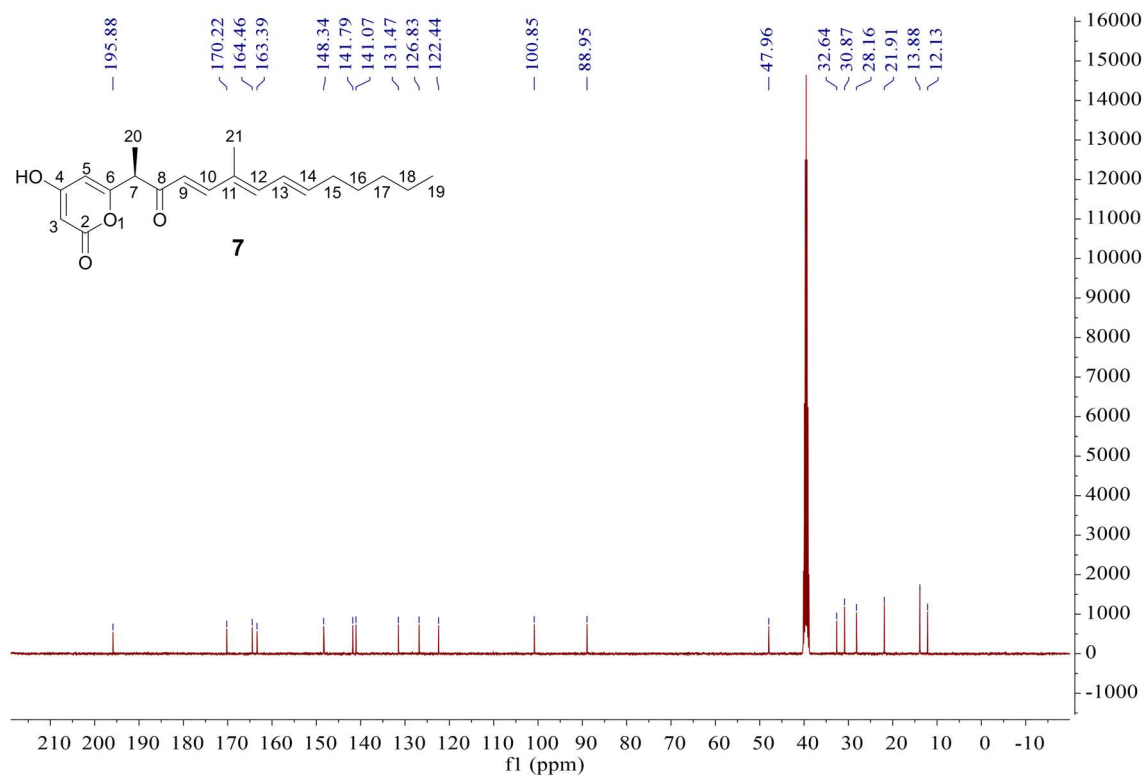

**Figure S83.** <sup>13</sup>C NMR spectrum of compound 7 in DMSO-*d*<sub>6</sub> (100 MHz).



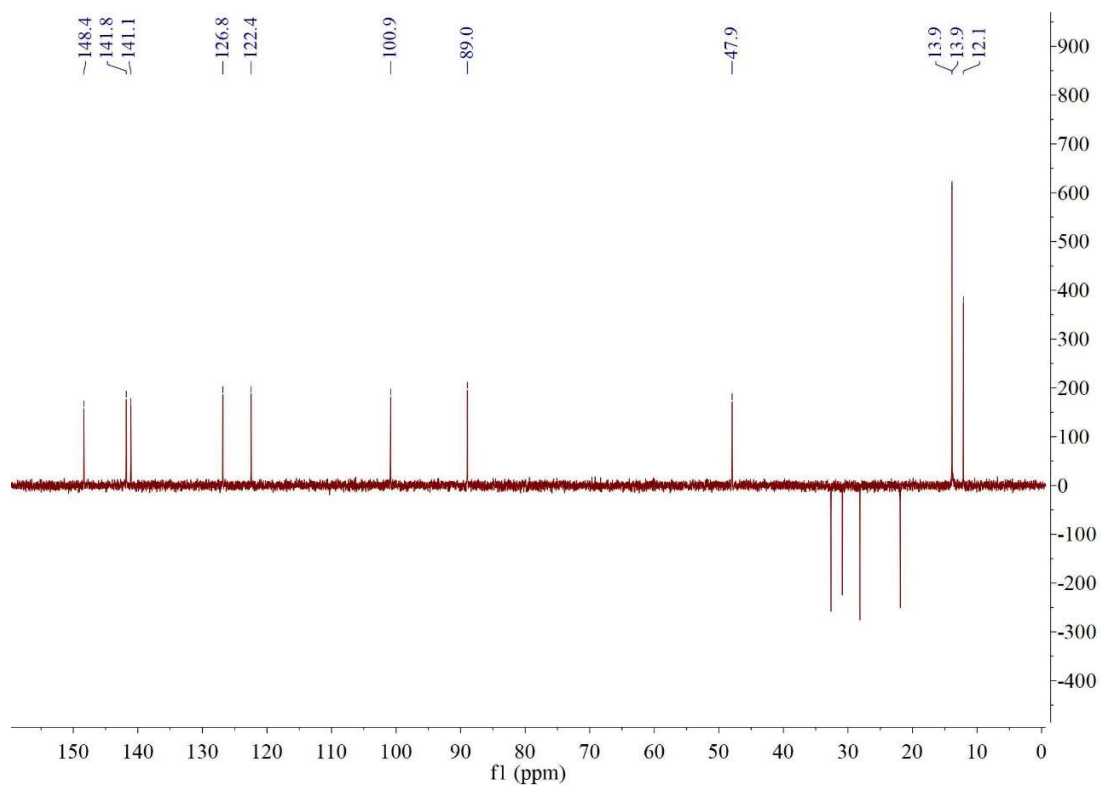

**Figure S84.** DEPT-135° spectrum of compound **7** in DMSO-*d*<sub>6</sub>.

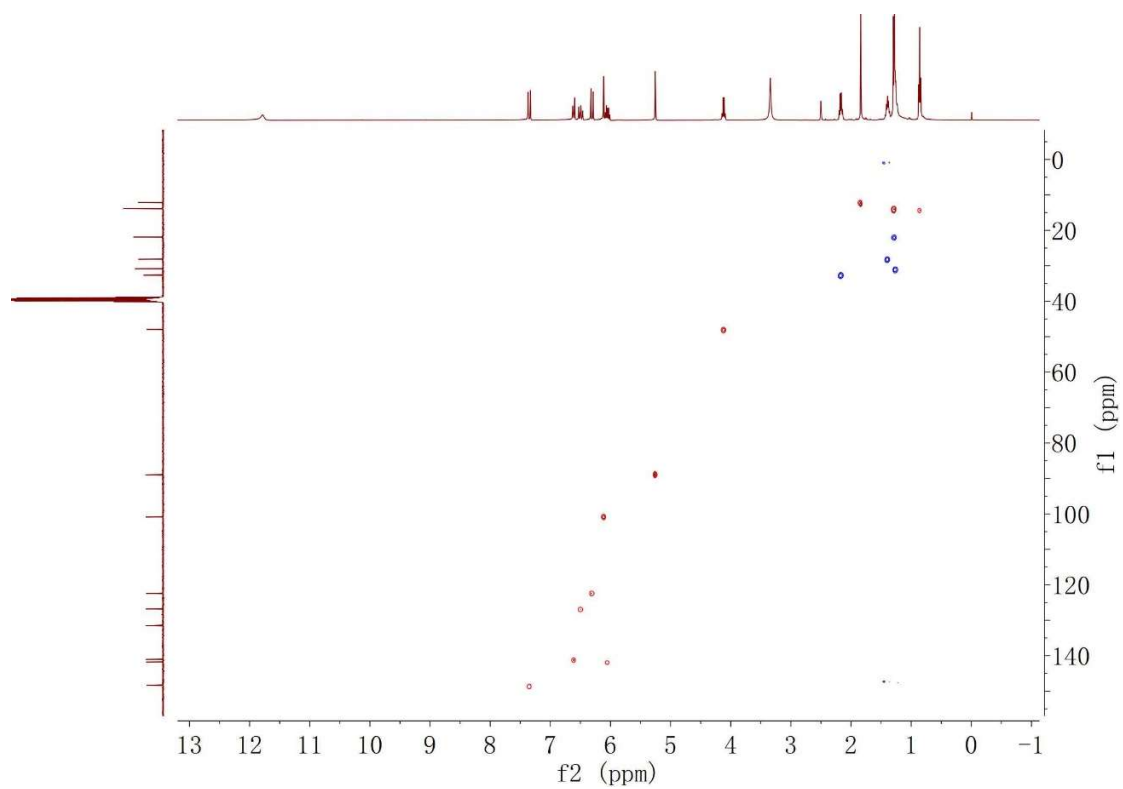

**Figure S85.** HSQC spectrum of compound **7** in DMSO-*d*<sub>6</sub>.

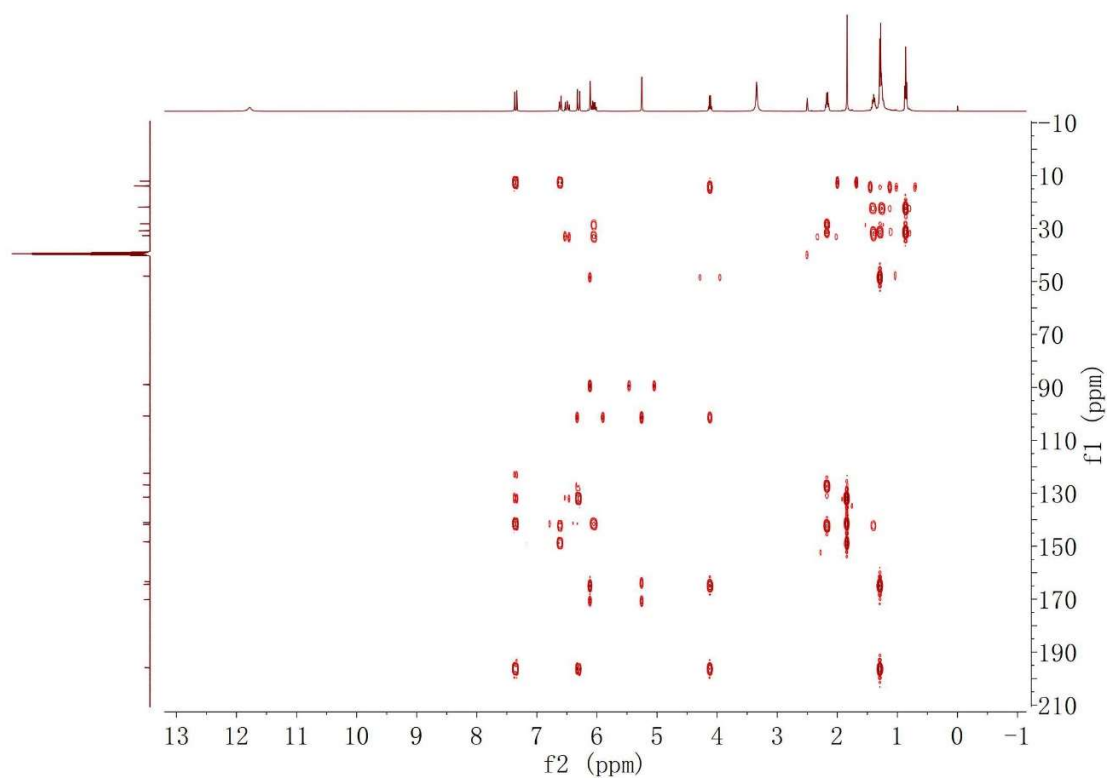

**Figure S86.** HMBC spectrum of compound **7** in DMSO-*d*<sub>6</sub>.

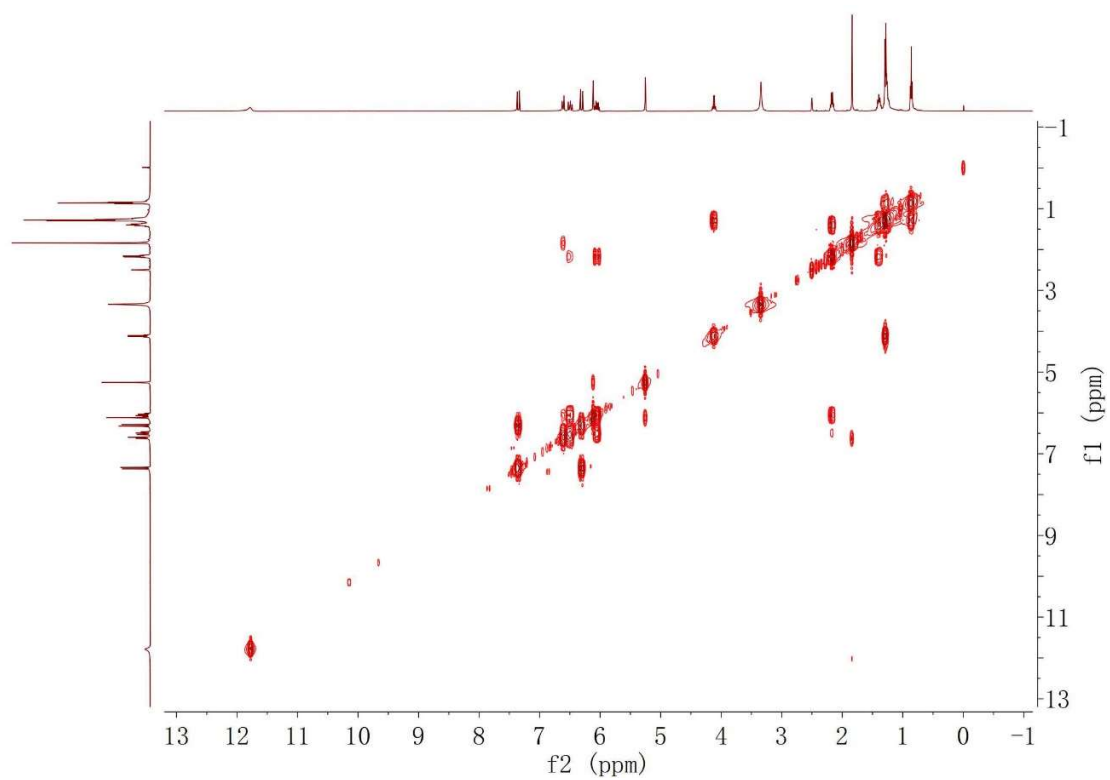

**Figure S87.**  $^1\text{H}$ - $^1\text{H}$  COSY spectrum of compound **7** in  $\text{DMSO-}d_6$ .

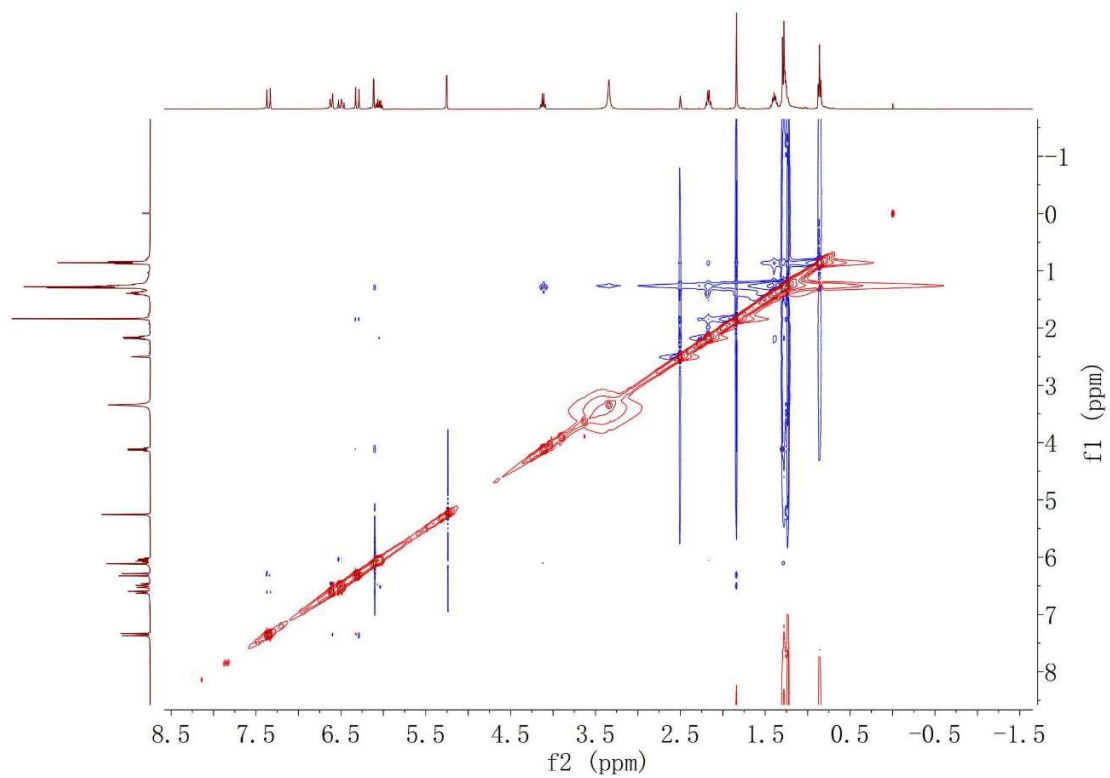

**Figure S88.**  $^1\text{H}$ - $^1\text{H}$  NOESY spectrum of compound **7** in  $\text{DMSO-}d_6$ .

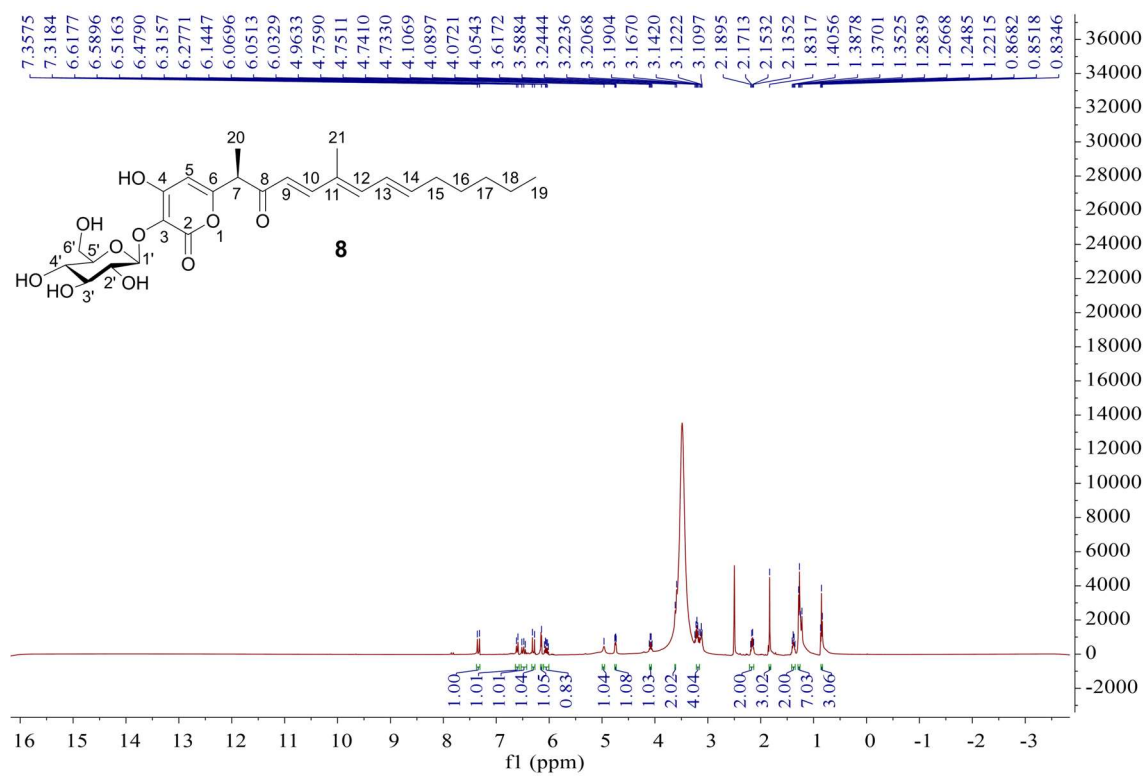

**Figure S89.**  $^1\text{H}$  NMR spectrum of compound **8** in  $\text{DMSO-}d_6$  (400 MHz).

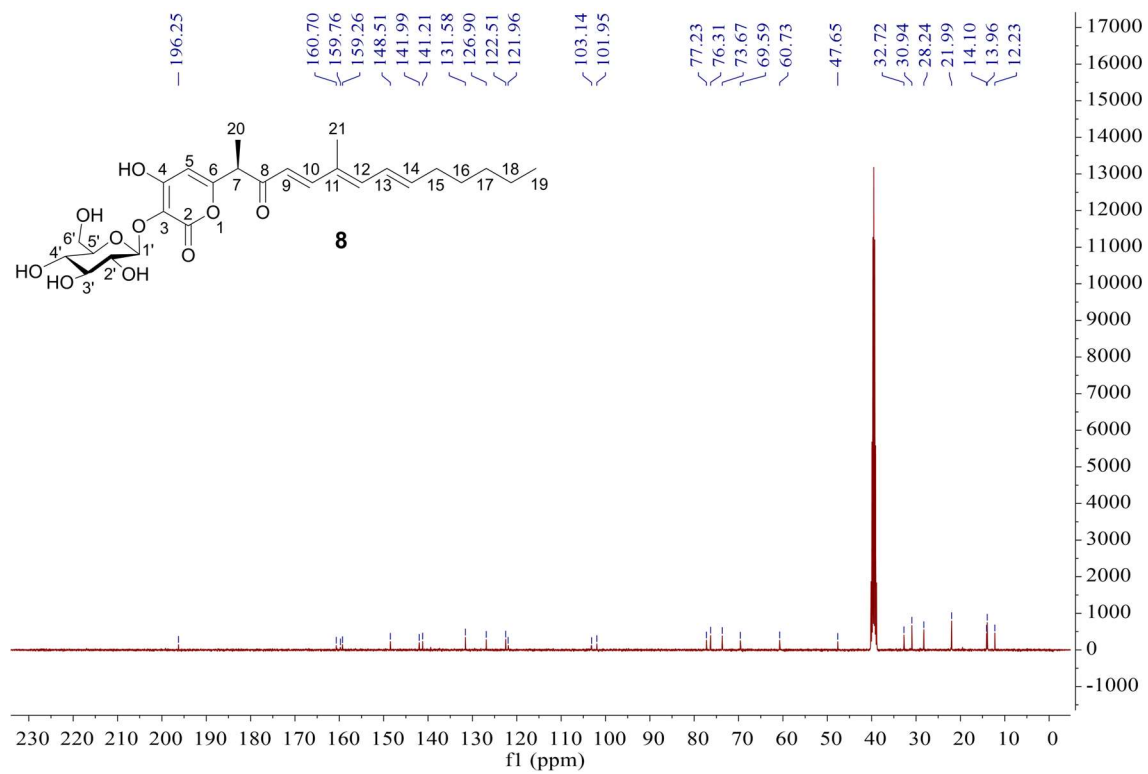

**Figure S90.**  $^{13}\text{C}$  NMR spectrum of compound **8** in  $\text{DMSO-}d_6$  (100 MHz).

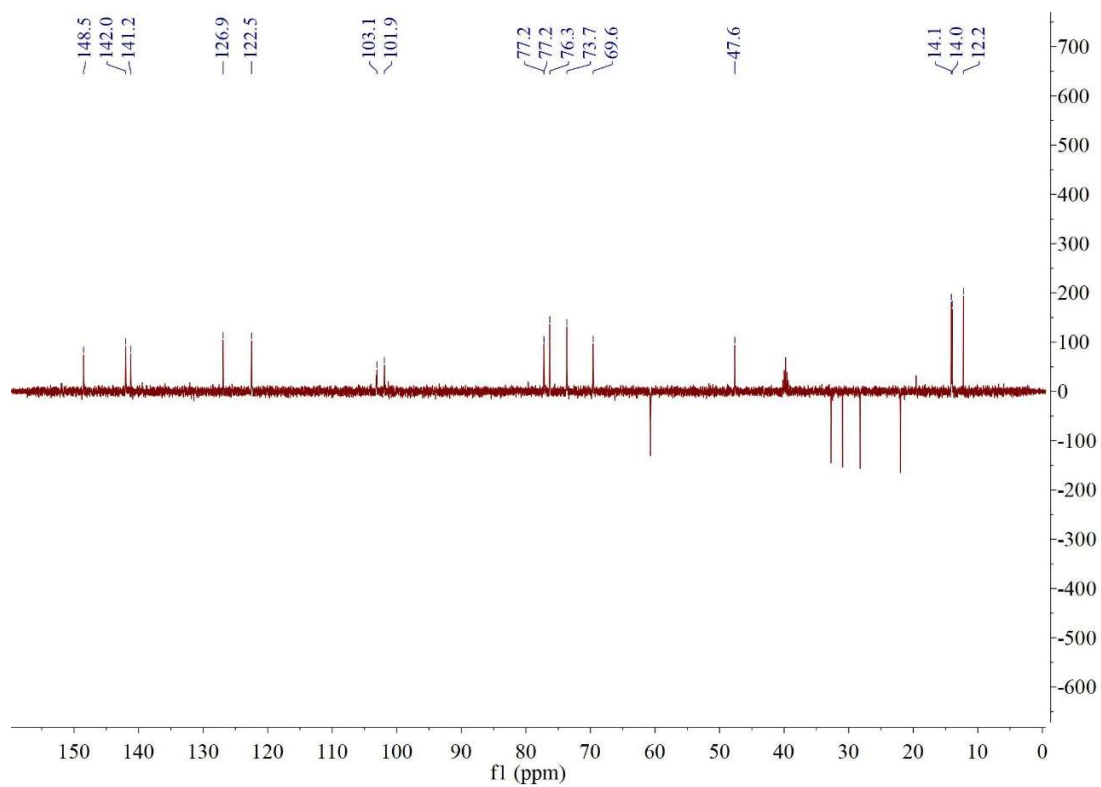

**Figure S91.** DEPT-135° spectrum of compound **8** in DMSO-*d*<sub>6</sub>.



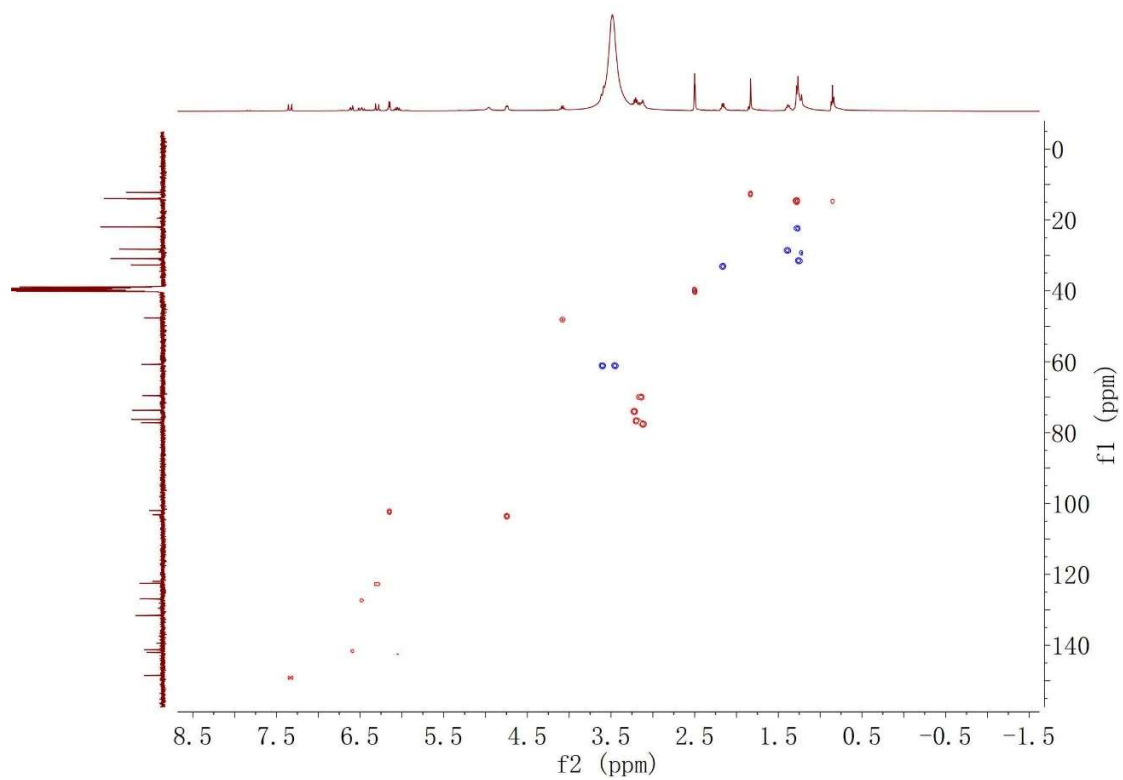

**Figure S92.** HSQC spectrum of compound **8** in DMSO-*d*<sub>6</sub>.

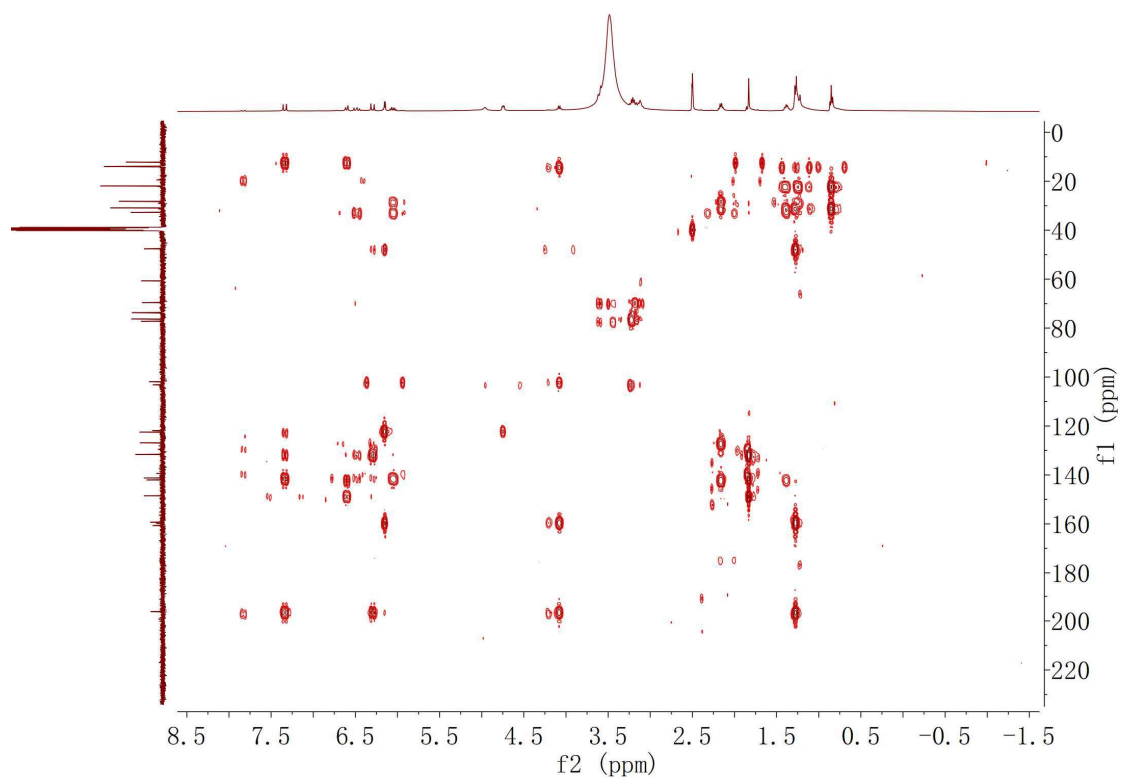

**Figure S93.** HMBC spectrum of compound **8** in DMSO- $d_6$ .

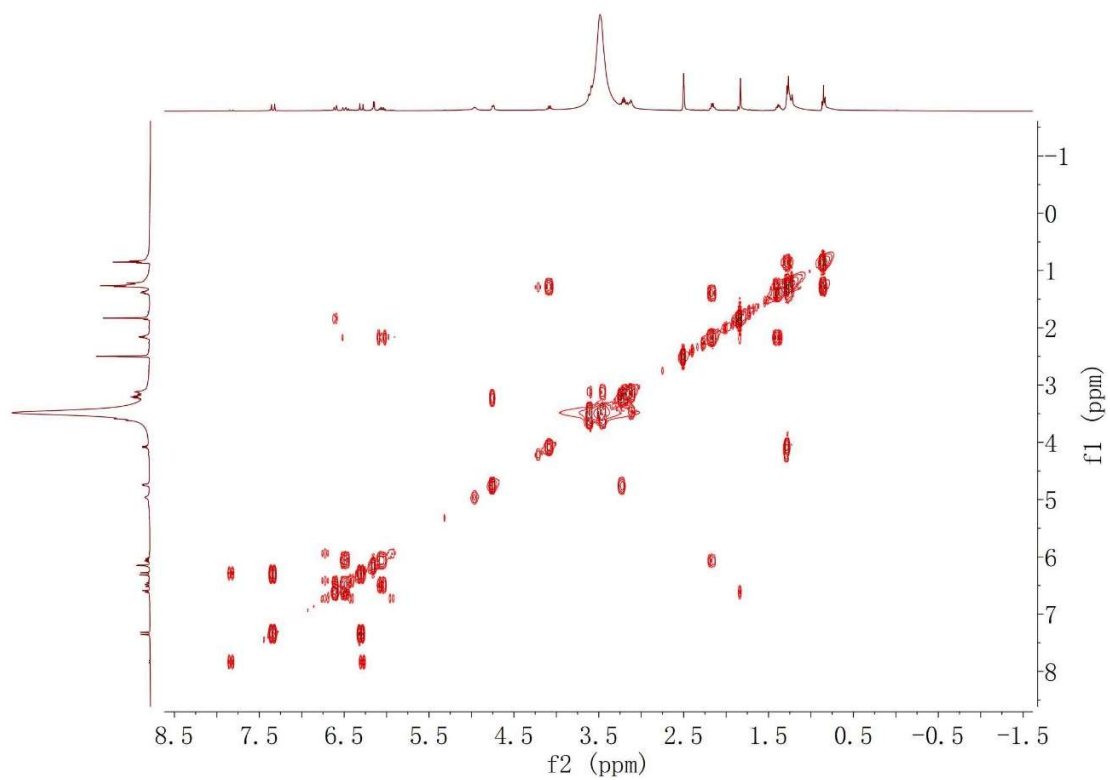

**Figure S94.**  $^1\text{H}$ - $^1\text{H}$  COSY spectrum of compound **8** in  $\text{DMSO-}d_6$ .

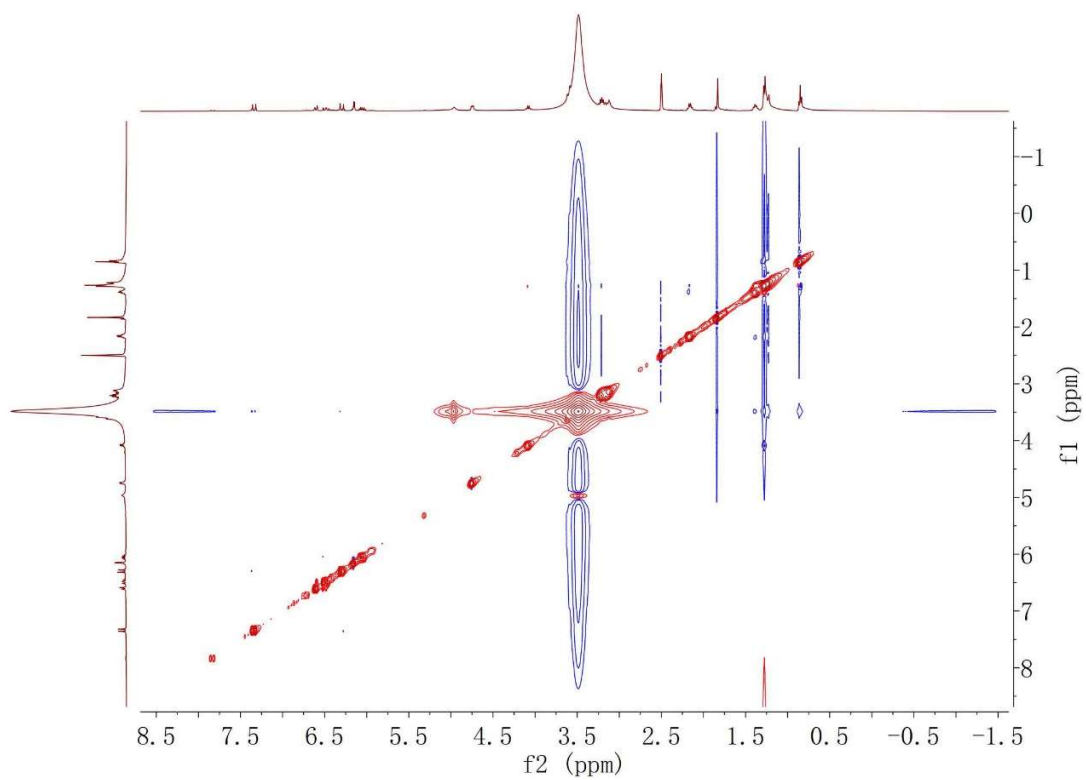

**Figure S95.**  $^1\text{H}$ - $^1\text{H}$  NOESY spectrum of compound **8** in  $\text{DMSO-}d_6$ .

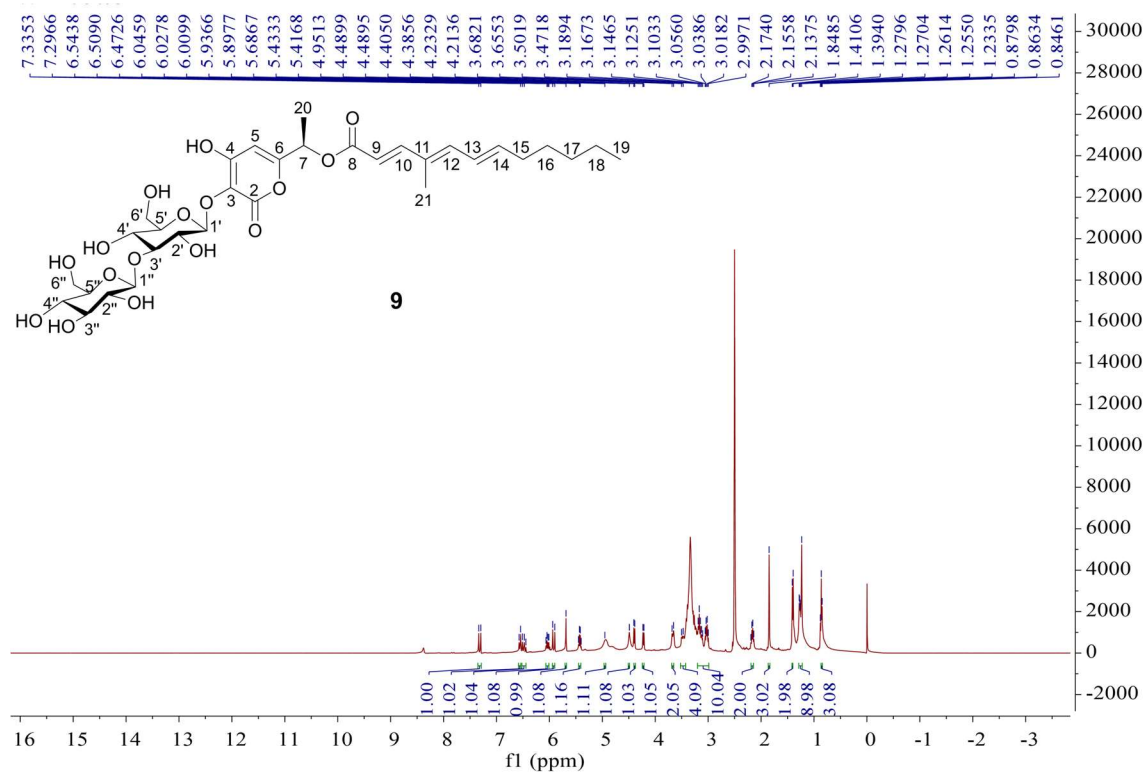

**Figure S96.** <sup>1</sup>H NMR spectrum of compound **9** in DMSO-*d*<sub>6</sub> (400 MHz).

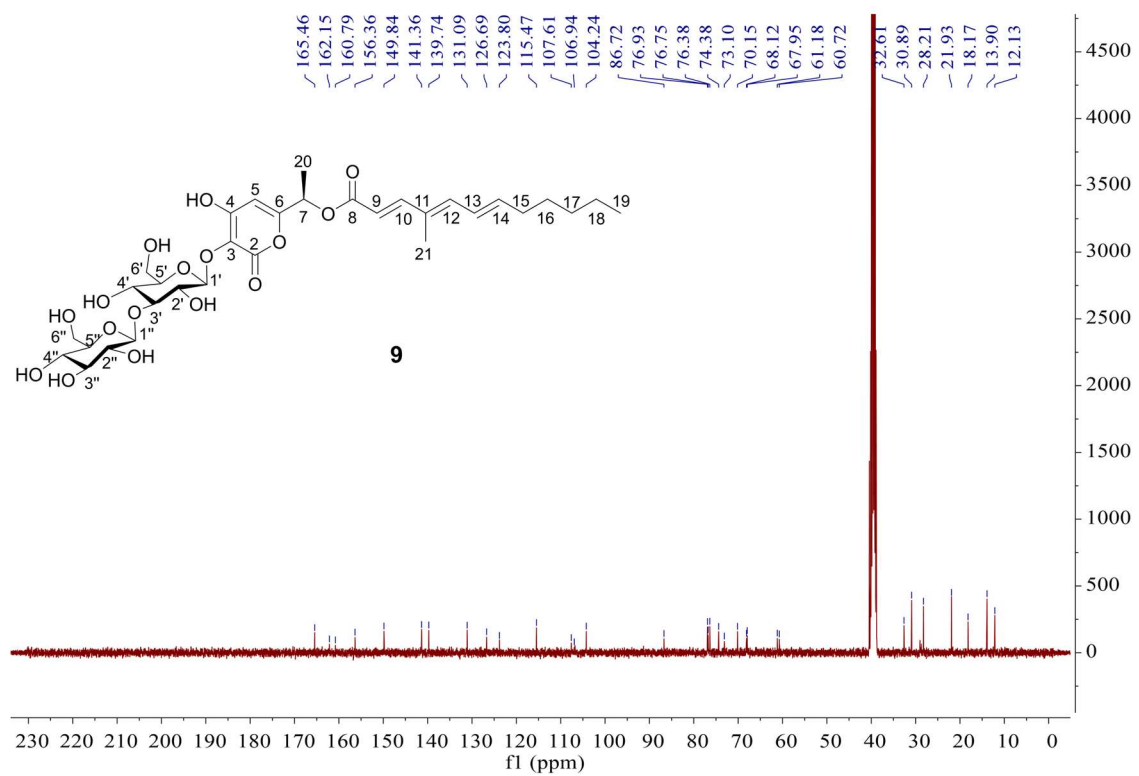

**Figure S97.**  $^{13}\text{C}$  NMR spectrum of compound **9** in  $\text{DMSO-}d_6$  (100 MHz).

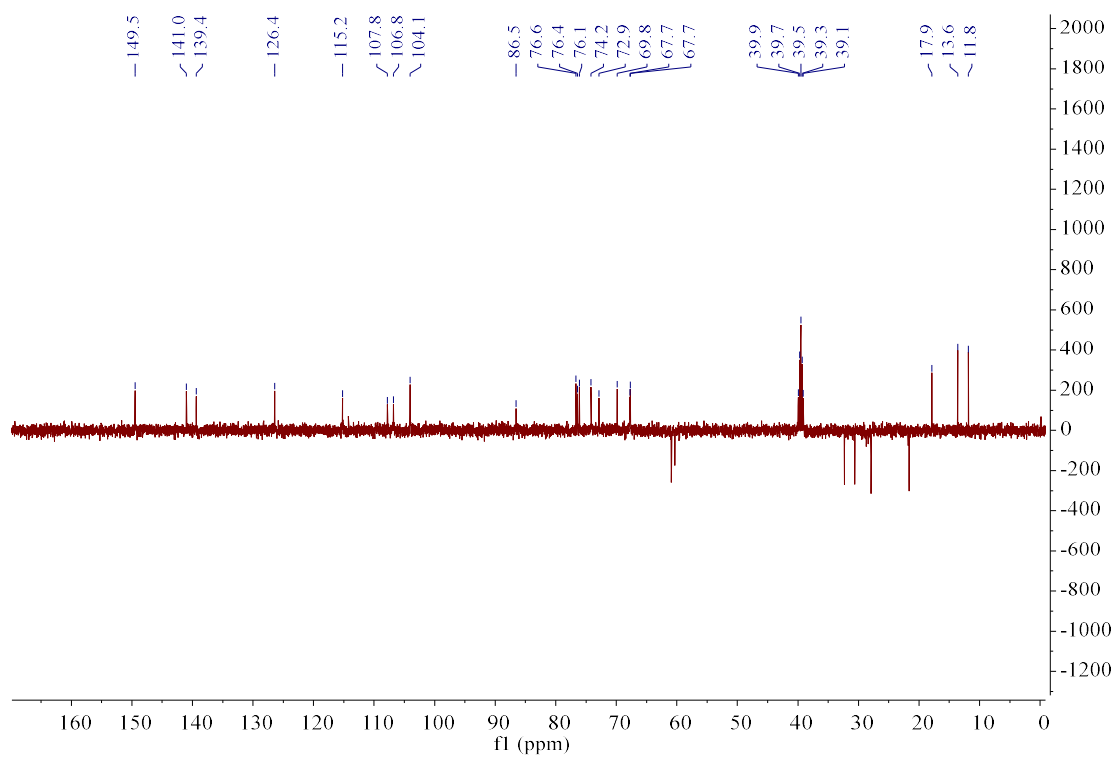

**Figure S98.** DEPT-135° spectrum of compound **9** in DMSO-*d*<sub>6</sub>.

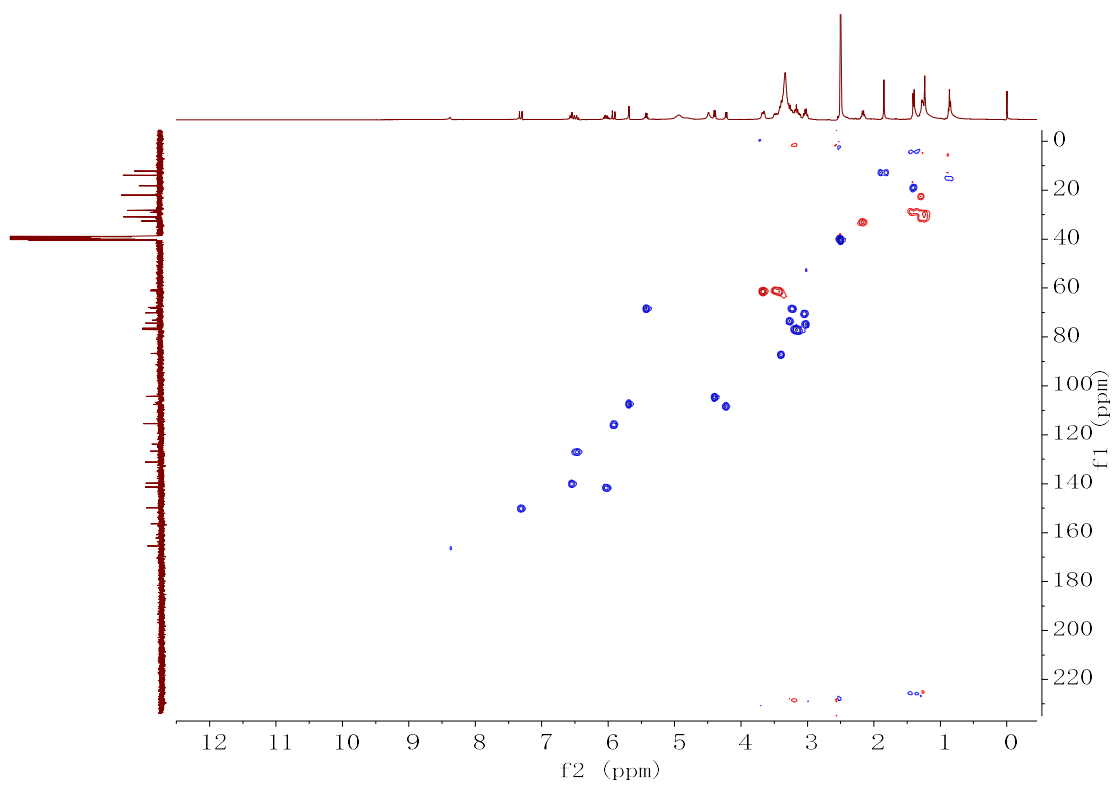

**Figure S99.** HSQC spectrum of compound **9** in DMSO-*d*<sub>6</sub>.



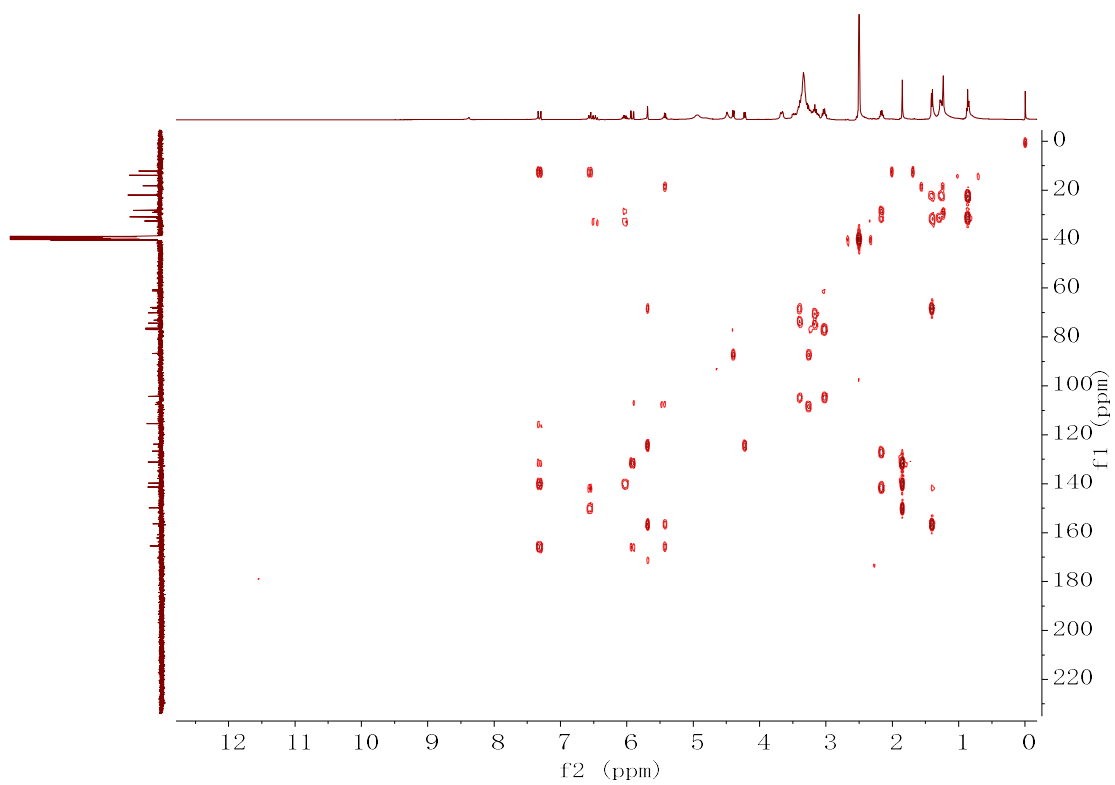

**Figure S100.** HMBC spectrum of compound **9** in DMSO-*d*<sub>6</sub>.

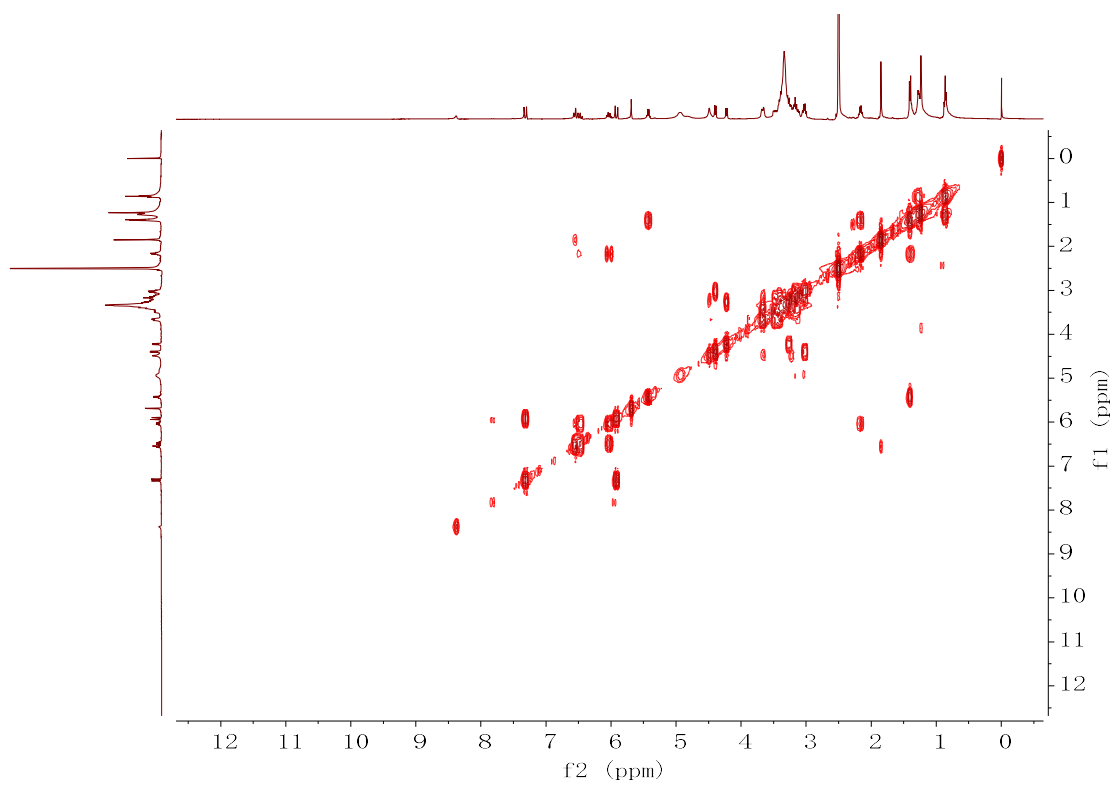

**Figure S101.**  $^1\text{H}$ - $^1\text{H}$  COSY spectrum of compound **9** in  $\text{DMSO-}d_6$ .

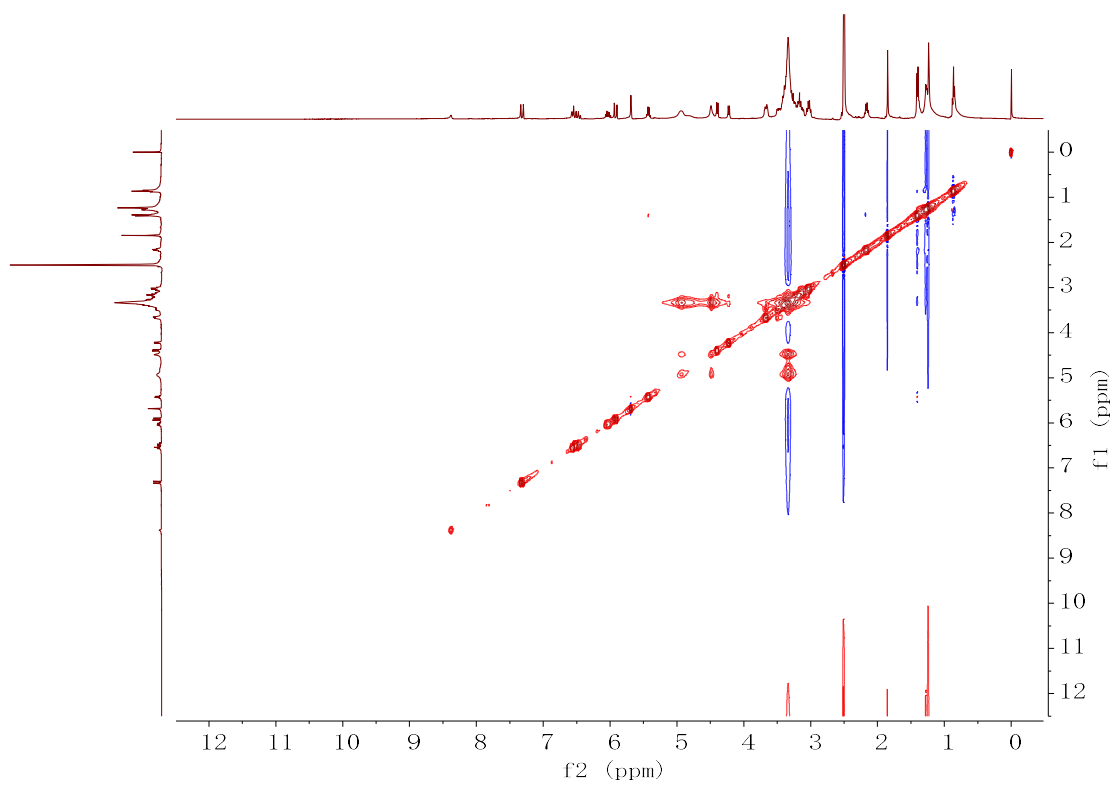

**Figure S102.**  $^1\text{H}$ - $^1\text{H}$  NOESY spectrum of compound **9** in  $\text{DMSO-}d_6$ .

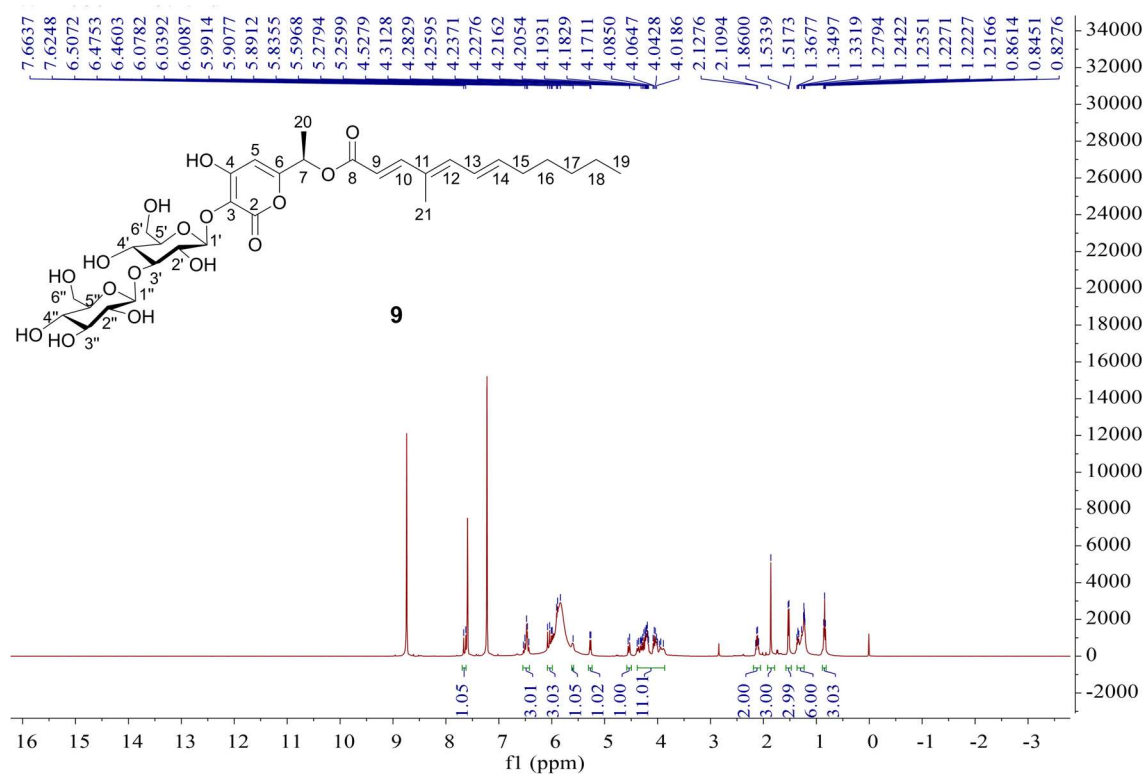

**Figure S103.**  $^1\text{H}$  NMR spectrum of compound **9** in  $\text{pyridine-}d_5$  (400 MHz).

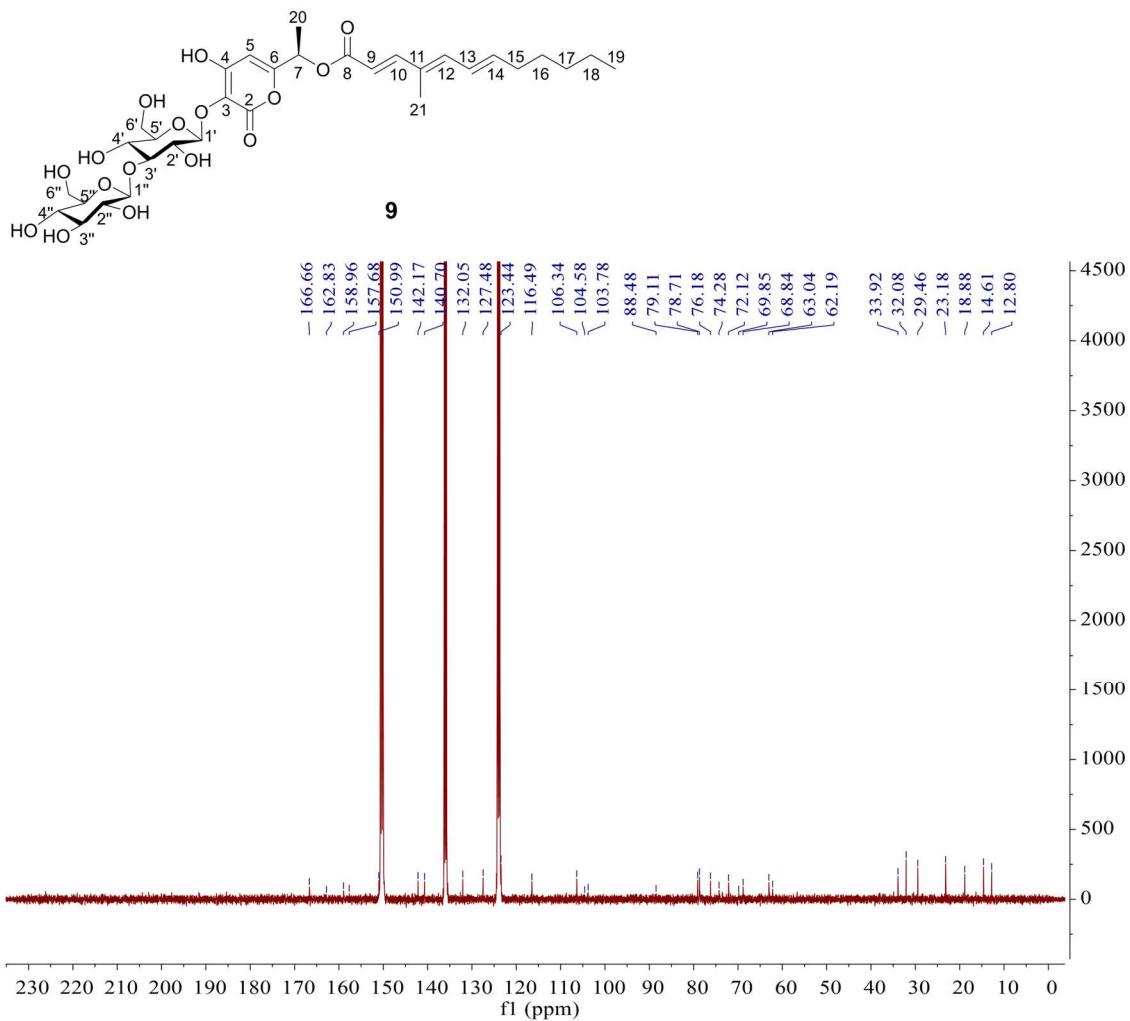

**Figure S104.**  $^{13}\text{C}$  NMR spectrum of compound **9** in pyridine- $d_5$  (100 MHz).

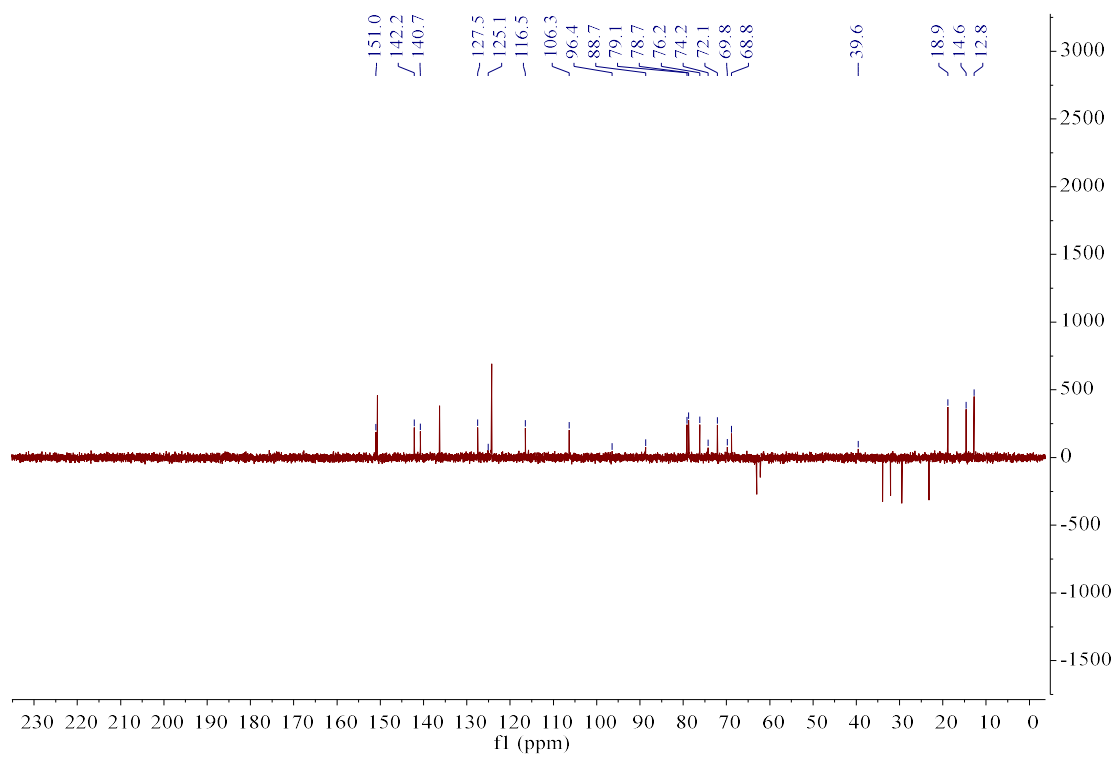

**Figure S105.** DEPT-135° spectrum of compound **9** in pyridine-*d*<sub>5</sub>.

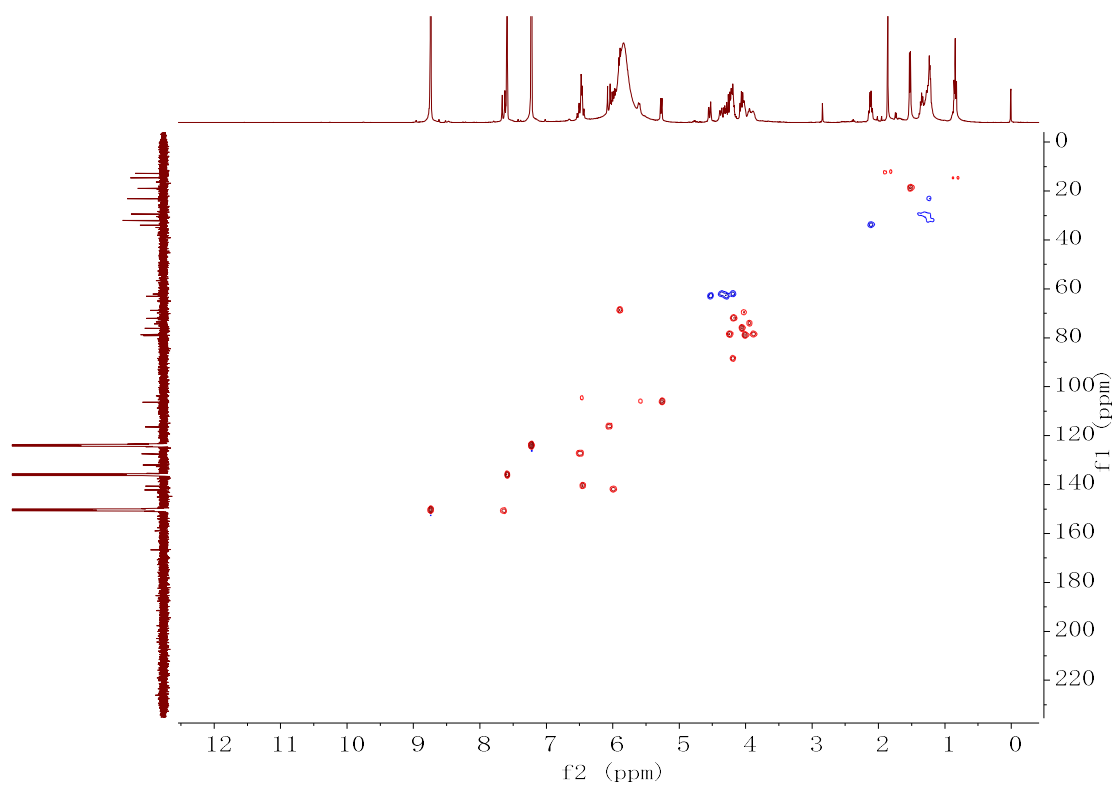

**Figure S106.** HSQC spectrum of compound **9** in pyridine-*d*<sub>5</sub>.

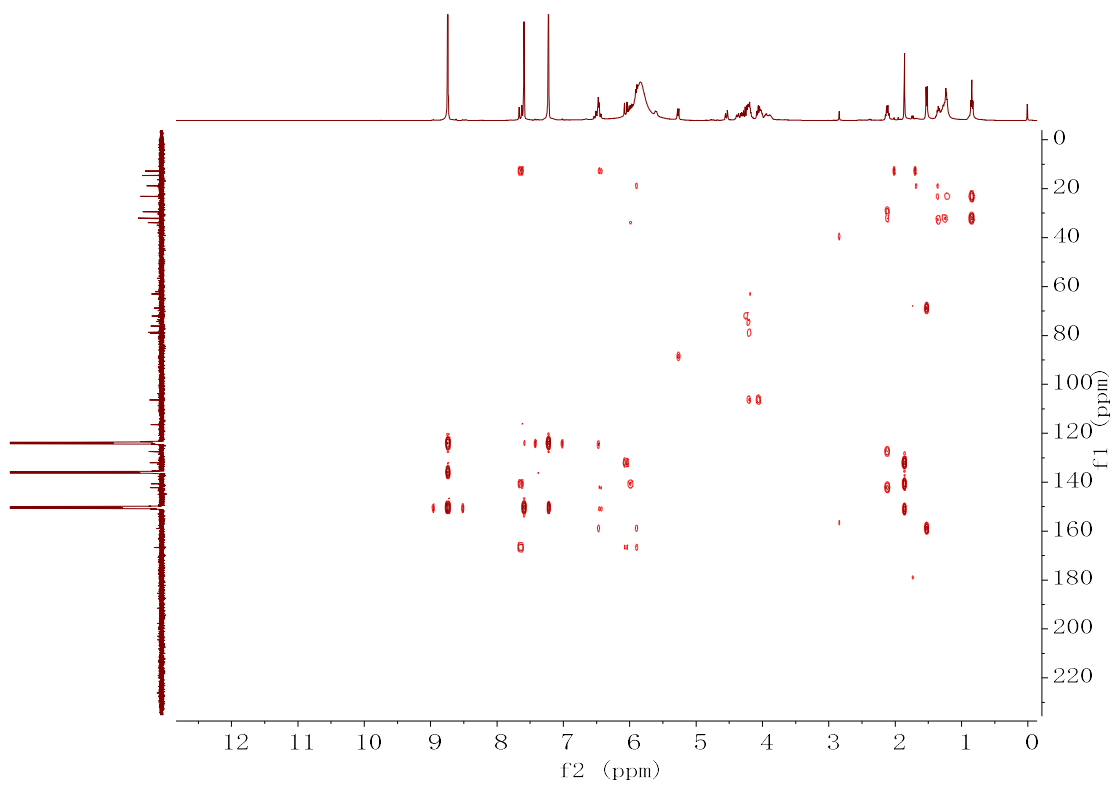

**Figure S107.** HMBC spectrum of compound **9** in pyridine-*d*<sub>5</sub>.



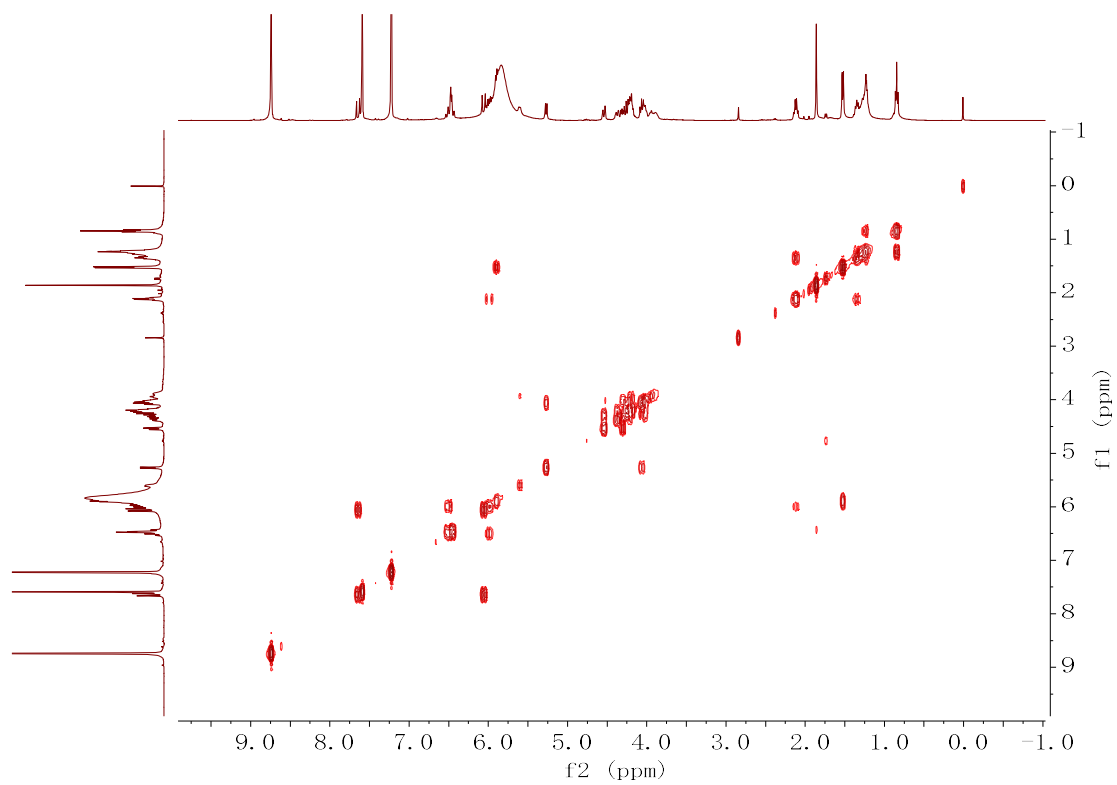

**Figure S108.**  $^1\text{H}$ - $^1\text{H}$  COSY spectrum of compound **9** in pyridine- $d_5$ .

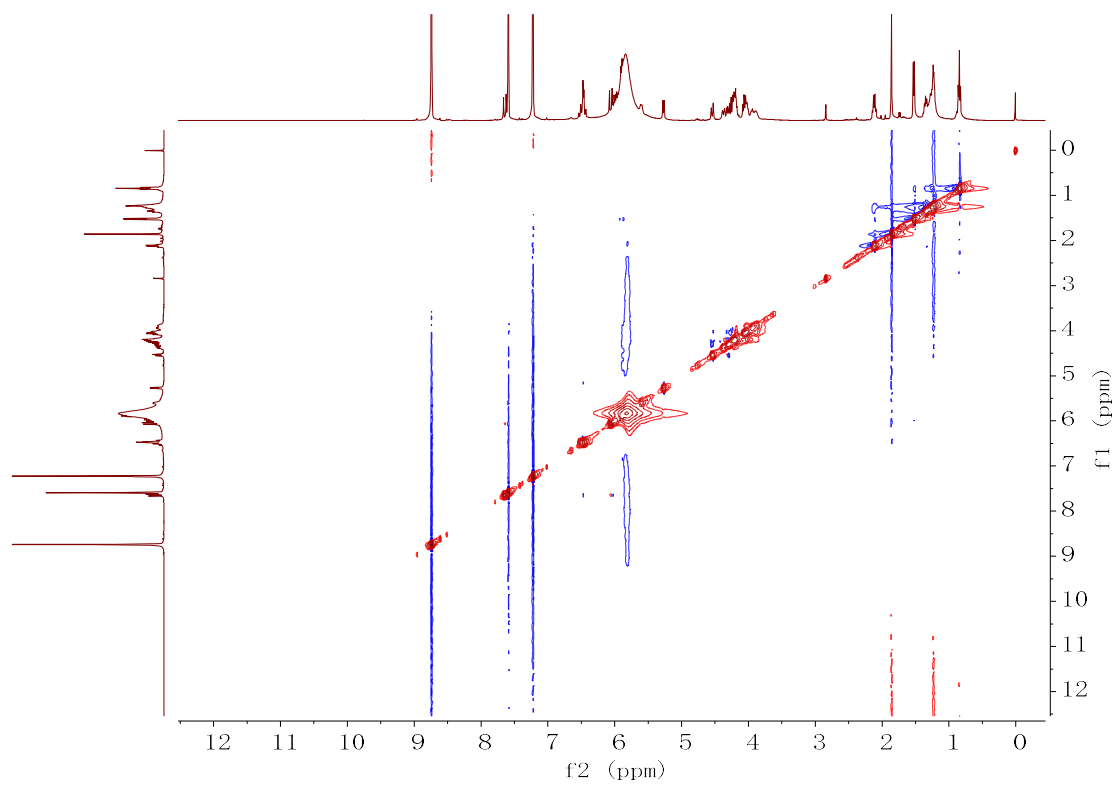

**Figure S109.**  $^1\text{H}$ - $^1\text{H}$  NOESY spectrum of compound **9** in pyridine- $d_5$ .

## 4. Sequence information of *pro* gene cluster

### ProA gDNA nucleotide sequence

ATGAAGTCCATCCCTTCAATCCTGGTGGCTGCCGCCATACCTTCCCTGGCCTCCGGTCAATCTT  
TCCAGTCTACCCCGATTATGGGCTGGAACATATAATCAGGTTTCGTGCAGCCCCACCAACAA  
AACCATCACCACAGCTATTGAGGCTCTCTCCAGCCGTGGTTTCGTCAATGCTGGCTACAAATTC  
TTCCAGATCGATTGTGGCTGGGCCTCGCGAGATGCGCAGCGTGACCCTACCACGGGTGCGTTG  
AAGATTGATTCCGATGCCTTCCCGGATGGACTTAAGCCTTTGAGCGACTTGGCCAGGTCCAAG  
GGAATGAAGTGACTATGTATTCAGACGCCGGTGTGCGTATGTGTGATCCCCAGTACCCATCAC  
CTGTGCTTGGATCATTGGGTCACGAAGCCGTCGATGCCGCATTTTTCAAGTCGCTGAACACAG  
AATATTTGAAATGTAGGTATTTACATCCGAAACAAATAGCATCCTACTAACCAGGGCATGATTT  
AGATGACAACTGCTACGCTGATAGCGCCAGCAACAATGCCCCCAAGGATCCACGAACCTGACTT  
TGTCACTCGTTTCGGCACAATGTGGAGCGAGTTGCAGAAGGTTGGGATTCCTGGAATGCTCAT  
TTGCCAGTGGGGCGTTCCATATTCCTCATCCAGTGGCCTCGAAGGTCCCGCGGAATGGACTCA  
GAACGTATCCACCTCTTCCGCCTCTCAGACGATATAGCCGAAGGCTGGGGCAATGTGTATCGC  
ATCTCCAACCAAGCCATCCACATCGCACATAGGGGCCTCTCAGGTCTGGCCACATCGCCGAT  
GCTGATCTTCTCGAGGTTGGTAACTCTGGCATGACATTTGACGAACAGGCAACCCATTTGCTC  
TATGGGCCATGCTCAAATCTGCTCTTATGATTTCCACGGATATCACGGCGCTGTCGGACCAGAC  
CGTGGCTGTTCTTCAGAACAAAGGATTTGATCTCAATCAACCAGGACGCAGCCGTTAAGCCCGT  
CAGCTTGGTGCAGCGATGGACCAGTGACCGAGACTTGTGGGCGGGACCGCTTGCCAACGGGG  
ATGTTGCAGTTCTCTATGTCGATCAGAGCAATAGTGCTCGAACCCTCAGCCTCCAGCTCTCTAA  
CCTCGGCTACCAGTCAGCCGACATCAAGGATCTGTGGACGGGGCAAACTACCACTGGAGCTT  
CTTCTTTTTCCAAGCAAGTCAACGGGCATGGCTCGGTCGCCTTACGTCTCTCAAACATCAAGA  
AACTCAGTAGCACCGCCAATTACAAGTACACTTCTGTATCTACTGGGTCATTGTCTTCAGGGGC  
TAAGACTGCCTCTTGTCTGGTTGCACCTCCTCAACCAAGGTCGGAAATGTTGGTGGCAGCGC  
CAACGGTCAGGTTGTCTCTCGAACATCAGCACGTCAAAGGCCACTCAAACGTTCTATTTGA  
TTACATCAATGGCGATGTAGGTTTCAGCTTACCAGGTAGTACCAACGACCGCTTGGCTTCTATC  
AAGGTCAATGGCGGCACTGCGCAGATTGTGAGCTTTCCACTGACAGGTTACAACCTGGGACAA  
GGATGTTTACAAGGGCTACGCCGTGGAGCTTTCTGGCTTCAATACGAGTGGACCGAATACCATT  
ACCATTTCCGGGCGTCAATAGTGGTTGGGCACCTGATTTTGACAGACTGGCCGTCGTTGCCTAA

### ProC gDNA nucleotide sequence

ATGGCAGTTACTTCAATTTCACTTTTGGTGCTCGGTATTGTTGCTGGTGCAACAATTTTTACTT  
GTCGTCGCCAACTAGGAAAGACAGGAAGAGGCCCTCAAACCTACCATCATCGGCGACATCC  
ACAACCTCCCAATCGAGAAGCCACTGCTGCGATGGGATGCTTGGGTGAAAGAAAATGGCGCT  
ATCGCAACGTCGAAACTGTTCCGGGATAATGCCTGTTGTTGTTATCAACACAGCCGAGGCAGCG  
ACAGAGCTGCTGGGCAAGAGGGGCGCTTGGTACAGCAATCGTCCAAGGTCCGTGGGCATGGA  
GATGATCACAGGCGCTGGGCCAGGACAGTCACGATTCACGTTGATGCATGACATGGATGCGCA  
TTTAAAGCTCCATCATCGCATCTTGTCTCCGTCGCTCGGTGGTGTGCTGCTCCGCGCTATCAG  
CCCGTCATGGAACCTCGAAGCCAAGCAGCTCGTCAAGGACCTCGTCAACTGAGCGAGCACAA  
GTCGGTAGTCGTTACCAGCGACGATGTGTTCCCTTTCTCGAACGCGCACAAGCGAGTATTATT  
CTCGCATTGCACTATAGCGTTCGGGTTCCACCCCTTGATTATCCACTTTATCAACGGGTCCGTTGA

GACGCAGGCTAAGGTCACCTCGTATGCGTCGAGGCCTGGCCTGCCCGATATCTTCCCATTCCCTT  
GCCAAGCTCCCAGCGGCAATTTACCGTGGCGTAGAGCTGCAGATAAATTATTTAACGAGCAA  
AAAGACCTCAACCTGCACTTGTTAAGCCTCGGTGATGACAGTCCCGGATGGAATGCAACGAA  
ACAAGCACGCTCCCTTGCAGCGAAATACGCCAAGGAGCCGATTCCCGACATTGACCTCGCTTT  
CACACTTGCAGAGTGTCCAGGGTGGTATAGAGACTAGCACTCGTACAATACTCTGGTTGTT  
CATCGCTGCGATGACAGCCAACAGGAGCTTTATGAAACGAGCGCATGACGTACTGGATGCTGT  
TGTCGGGCGGGATCGACTCCCTTGCTTCGCGGACAGATCCTCCCTCTGTTACATTGACGCTATT  
GTATCTGAGCTTCTGCGTTGGCGGCCATTTCCCGGGAGGTGTACCTCGTCGGGCAGACAAA  
CAAGACTCTTTTAAGGGTATCAACATCGTCAAGAATGCGATGGTCTTGACAAATGCGTGGTCTA  
TCGGCCGTGATGAAGCTGTGTTTGATCAGTCGCTGGGCGACCTCGACCAATTCATTCCCGAAA  
GATGGCTAGATGGTGAAAGCATAGGCGTAGACATTAAGAACCAAGGAGAAGTACTGAGGACTTCC  
CTCCCGTTGCCAGTATTTGGTCACGGTCGGCGAAGCTGTCTTGAAAAACGTGTTGCTGTAGAT  
GGCACCTTTGCCAGGTCGCAACGATGATCTGGGCATTTGACTTTGAGCCTACCCAAGACGTA  
GATGAAATGGAGATGGAGGTTGTCTGGTTTATGACGGAGCCCAAACAGTTCAAATTCAGCTA  
AAGCCGAGGGTTTCATGGGTATCCAAGGTCATCGAGGAGGAGTGGAGGACTGCTGATAAAGA  
CCTTGTAAGATCATGGGCAAATTTGGTGATATTGAGGCCTGA

**ProD gDNA nucleotide sequence**

ATGTTTACCGCTTTGTTTCTTTCTGCCCTGGCCTGGAGCCAAATGGCAAATGCCCATGGAAC TA  
TTACCAGAGTAATTGGTGCAAATGGTGTGTCATGCCCGGACTTACAAGTAGGAACATCTCTG  
GAAACTTGAGCCTGGTTGCTAACAGGTGGCAGTCCTTGATGGAACACCTCGATCTTCTACCTC  
TGCTGCTTCCGGAGCACAGGTTGATACTAGCGTGATCCGTGACCCCGAACTTGGTACTAGTAA  
AGCCTCCGCACTTGGTCGCACTAGCAAAGGCCAGTTGACGGCGCTCGCGTCATCAAGGCTTT  
CATGCATGGTCTCAAGGGCCGGTCCCTTGCTGACACTATCCTCGGGGAGGCGAAGAAGGTAT  
AGTGAAATGGCAAGCAACAATAGCTCTTGACAGCTAACACTCTATAGCTACGAGAGAAGCCGT  
GTCTTTTGTAAGTGGAAATGCTGGTGCAGTTGTAAACGGTAGGCTTTTGTTAATACTTTAACT  
CGAGTTACTGACCTATTCTAGGCGTGCAAGATGGAATTGAAAGCTCTCCAGTTGGCGGTTTGG  
CCCTAGGTATGTCGACAGAAGCAGTTCAAACACTGGCATTATATGCTGATCGATAGTAGGGGCTG  
AGCATGGAGTTAATGGTCTTCTGGATGACTTTTTCCAAACGGCAAAGGGTGTCCCATCTCCTCG  
TGGATACATCGAAGACGGTGTCCAGAATTCCACTGGAGTTGGTGCCAAGTCTGGGTTGCCAAC  
CACCGCATCCGATGGAACCTCTCAAGTTGATCTACCACCAGGTTTCGTGACCATGATTCTCATTG  
TGATCCATATTGACTTTTTGCCATTCAGGTCAATGAGGACGGTGTGGCCCCCTTGCTAGTAGAC  
ATTGACTTCACTTCAGGAGGGACTGATCCGAAAGCTTTTAAATCGGCTGAAGTGGTTCAGAAC  
ATCATTGGAGTATTGGGCTTTTCGACCGTGAGCTCGACTGACTTTCCCGTTGTTGTCAAAGTGC  
CTACTGGTCAAGTTTGCCTGAAAGGTAGCTGGCGTTTCTGGTATCTGTATTGCAAGGGTGC  
GAAACAGCGCTACTGCTGGCCCCCTTTGGAGGCGCTGCTGCATTCATCATAACCCAGAGGCTG  
CAAAGGGAAGACGTCCAGCGCAAATTTGCCACCGCCATGTCTGA

**ProE gDNA nucleotide sequence**

ATGGACACATTTCGACGTCATAATTGTCGGTGTGCTGGCTTGGCCGGTATTAACGCGGCGTACCGCC  
TCCAAATTGCCTTGCCGAACCTCAGCTACGCCATACTCGAGGCCCGTGATGATATCGGCGGCAC  
ATGGGACCTTTTTCGCTATCCAGGCATCCGCTCGGACTCTGATCTATACACCTTTGGCTTCGCAT

GGCAGCCGTGGGATCAGGGCACCGCGCTGGGTGAGGGCGGTGCTATCCTTAACTACATGAAG  
AAATGTGCGCAGACTTACGGAATCGACAGGCATGTTCACTGCCAACGGCGACTAAAACATGCC  
TCATGGTCTACACCCCAGCAGAAATGGACCCTTGAGGTAGAAGACATTGGCGCACAAAAGGA  
GCTTCAGTATCATGCCCGGTTTCGTCATGCTCTGCACTGGCTACTACGACTATCACAACGGCCGT  
GACACGGCCATCCCCGGCCTAGAAAACCTCAAGGGCCAGGTAGTGCACCCCCAGTTTTGGCC  
CGAGGATCTGGACTACACCAACAAGCAGGTAGCGGTGATCGGCAGCGGCCACGGCCATCA  
CGCTGATCCCCAACTCGCCGAGAAGGCGGCTCGAACTACCATGGTGCAGCGGAGCCCCGTCG  
TATATCTTGTCCATCCCCAACGGCGGCAAAAAGGGCGCCATGGCTTGACGGCTGTTCCCTGCGC  
GGTGGGCTCATGCTTACACCCGCTGTCGTTCTGATATGGTCCC GCCTGATCTGGCTCTTTTG  
TCAAACGTTTCCGGATCGGGCCCGTCAGCGGCTCCGGAACGGCGTCGAGAAGGAGTTGCCGC  
ACCATCTGCCCTACGATCCACACTTTAGCCCACGCTACAACCCTTGGGATCAGCGTGTTCCT  
GACCCCCAATGCCGACTTCTTCAAGTGTCTGCACACGGGCAAAGCTGACGTCAAGACGGGCA  
ACATCAAAGAGGTAGTTGCCGACGGCATCGTGCTTGAGAATGCGCCCCAAGACAGGATCCCC  
GCTGCTATAATCATCACGGCGACTGGCCTCAAGTTGCAACTCGCAGGTGGTGCCACCATTGAC  
GTCGACGGCGTCCCTATCAAACCCTCTGAGCAGTACTTTTGGAACGGAACCATGCTGCAGGAT  
GTGCCAAATCTGTCCCTTGTATCGGCTACACCACTATCTCATGGACTCTTGGTGTGATACCG  
CCGCCATGCTCGTGTGCCGTCTACTGCAGAAGATGCAAAGGCCAAGCTGTGAGCGCCACG  
CCTCGAGCTGAACAGGGCCTCGCCCTGACGCCAAGGCGTCTGTTTAGCCTCTCGTCGACGTAC  
GTCACCACGGCAGAGAGCGAGCTCCCAAGAGCCGAGCCCAAGCACCCCTGGCAGCCTCGAA  
CCAACCTACTCTCAGATTACTGGTTTCGTCAGCTGGGCAGATTAGACAGGGGTCTTCAGTTTG  
TGCGGGAGGGAAAGCAGCTGTGA

**ProF gDNA nucleotide sequence**

ATGTCGGCATAACCAAAGATATCATGAACAATGGCGACGCAATTCAGAGCCTCTCGTCCAG  
GCTGTCTTGCAGCAGGACAAGTCCATGCCTATCGCCATTGTGGGCATGGCTTGTAACCTACCCC  
GAGAGGCCACCAACCCAGACAAGCTATGGGAACTATGTGCCGAGAGGAAAGCCGCCTGGAG  
CGAAGTTCCCAAGGAGCGTATGAACATTGATTCTTTCTGGCATCCTGATGGCGAACGAGGAGG  
AAACGTATGATCTTTTGTCCCTTGCCACATTTTAAAGAGTTTGATACTGATAAAGTAATTCTAGA  
CAAACGCAAAGGGAGGACACTTCCCTCAAGCAAGACGTTGCCGCCTTTGATGCATCGTCTTCT  
CCATCCCTCCCACAGAAGCAAAGAGCATTGACCCTCAACAACGCATTCTTATGGAGACAGTGT  
ATGAGGCCATGGAGAGTGGTGAATGAGTATGGAGGACATGGCTGGCTCCGACACGAGCTGC  
TACGTGGGAAGCTTCTCTCGAGACTACTATGAGATTATCGATCGAGATCCGGAACAGCACCT  
CTGTACTCGGTGACGGGTAACGGAGCTGCTATTCTGTCTAACCGTATCAGCTACTTCTATGATCT  
CAAGGGCCCCAGTCTGACCCTGGACACAGCCTGTAGTAGTAGTCTAGTTGCCCTACATCTGGC  
CTGTGAGAGCTTGCCTCAGGAGAGAGCCATTGCTCCATCGTCCGTGCCACTAACCTGATTCT  
CAACCCAGACATCATCACAGCCATGTCCAACATGCATTTCTCAGCCCCGACTCACGATGCTAC  
AGTTTCGATGCTCGTGCCAACGGCTACTCCCGTGGTGAGGGTATTGCTTGTGTTGATTCTCAAGC  
CCTGGCTGATGCCATCCGTGACAATGATACCATTCTGTGCTGTGATTGAGGCACTGCCTGCAA  
TCAGGATGGGAAGACCTCAGGTATCATGTTGCCTTCGCGAGAGGCTCAAGAGGAGCTTATCAA  
GACGGCGTACAGGGATTGAGTTGTGATTTTGCTACCACGGCCTATTTGAGGCTCACGGCAC  
TGGAACACAAGCCGGAGATCCCCTTGAGTAAGCCATTATGCAGAAACAATGTCTAACTCTAC  
TAACCTATGTTAGATCTGGAGCCATCGGTAGCACCTTTGGCCCCACCGCCCTGTGGACGAGA

ATGGCTGCAAGCTTCCACTTTATATTGGTAGTGTCAAGACAAATGTCGGCCACACTGAAGGTA  
CAAGTGGCCTTGCCGGTGTCAAGGCTGTCTTGTCTCTCGAACGTGGCGCTATTGCTCCCA  
ACGTGTACTTTGAGACGCCAATCCGCAGATTGACCTTGAAGGCTGGAACCTGCGAGTCCCA  
CCAAGGTGATAGCCTGGCCTACCAAGGGGCAACGTGCAATTAGTGTCAACTCGTTTGGATTG  
GTGGAACAAACGGACACGTCATTCTTGATGATGCGTTTCATTATCTTAATGGGCGTGGTCTGAA  
GGGCGCTCACCGAACGGCCCCTAGGCCACTGCTGGACTTGCAAACCTGGTATTGCAATGAGCA  
ACGCAATTGCTCCCGTCTTGTCTAATGGCAACGGCGTCAATGGGCATACAAACGGCCATACTAA  
TGGCCCTACTAACGGCTATACCAACGGCCACTCCAATGGTCACTCTCTCTCTCTGCAAAGCGC  
CACCGCGTGTTTCATCTGGTCTACTCATGAAGAGAACATTGCTGGAAAAAGCGCGGCCGTATAT  
GCTGAGCATCTGGCCCACCGCAAGGAGGCAGACGAGGAAGCCTTCCTCGACAACCTCTCGTA  
CACACTCTGCAGCCGTCGTTCCATGTTGCCCTGGAAGTTCGTTCCCTGGTGGCTCAGTCTCTACCC  
GACTTAGCCGAGAAGGTGGCCGCGACGCGCCAGAAGCCAGTGCGCGCATCCATCAGCCCGCT  
CAAGATCGGCTTTGTCTTTACAGGCCAGGGCGCGCAGTGGTTCGCCATGGGTCGAGAGTTGAT  
ACAGACGTACCCCTCTTCCAACAGCGGCTGGAATATTCTGACCGGTTTGTCAAGAGTCTTGG  
AGCCAAATGGTCTCTCATTGGTAAGTAACTCTGGGTCGTGGATCTTTGGGGCCGATACTAACTG  
GCATAGATGAACTGAACAAGGATGAGGAGACATCTCGCATTAAACGAGTCCCTCGTTAGCCAGA  
CCGCTTGACGCGCCCTCCAGCTTGCCTTGGTTGACCTGCTCGCCAGCTGGGGTATTCTGTCCCC  
AGAAGGTCATAGGCCACTCGAGTGGTGAGATCGCCCGCGCTTATGCTTCAGGTATCTTGCCAA  
CGGAATCAGCCCTCAAGGCGGCCTACTTCCGCGGTCTGCACTCTTCTCGTGTGCAAGAAAAGC  
TGCCGTCAGCTGATGGCGCCATGATGGCTGTTGGTCTTGCTGAGGAAGATGCCAACAATTACA  
TCAGTGCCCTTGCTCCGGAGCTCGGGAAGGCATCCGTCGCCTGCATCAACAGCCCGACCAATG  
TCACTGTCTCGGGTGATCGACCTGCCCTAGCCGCTCTGGCAGAAGCTCTCCAGAAGGATTCCG  
TCTTTGCGCGTTACTCAAGGTCTCGACGGCGTATCATTCCCACCACATGGATGCTGTTGCTAG  
CGATTACGAGCACTCTCTGGCTGGTATGGAGGTCAATACGCCCTCGGAAACTATTGAGATGGTC  
TCGGCCGTTACTGGAGAGCTATTGAAGTCTCTGACATCCTTGGCCCTAAGTACTGGGGGGAG  
AACATGGTGTCCCCCGTCCGCTTCAACTGGTCTGCAGACTCTCTGTGCTCCCCGTGCCACT  
GCCAAGCGTACTCGTCGTCTTGCCGCCAATCAAGCATCTGTAGACGTCTTGGTAGAAGTCGGC  
CCTCACGCTGCCCTGGCAGGTCCAATCAAGCAAATTCTGGGCGTTCCCGCTTGGGAGAAGAGC  
GGCATTGTATAACAAGTCTGTGCTATCTAGGGGACAGGATGCTTGCGCGACTGCTCTTGAGGCTG  
CGGCATTCTCTTTGCCAAGGGATGTACGACTATTGACCTCTACAAGGTCAACTCCCCGCTGG  
GTCCATACAGCACAGCCGCGTGTGCTCGTTGATCTGCCTCCATACTTCTGGAACCACACCAA  
GAGCCACTGGATGGAGTCGCGGTTGAGTATCGAGCATCGCTTCCGCCGTCATGCTCGCACTGA  
CTTCTTGGGATATCCTGTCAATGACTGGAACCCTATGGATCCACGCTGGCGCAATCTCATTCTG  
CTCCGCGAGCAGCCCTGGCTGAAGGGCCATATCGTGCAGGGCTCATATGTCTACCCTGGTACA  
GGCTACTTGTGCATGGCTCTCGAGGCGATGTATCATCTGCGACAAATGCCTGAGTATACAGCAC  
CTCAGGGTGACTTTGTGGGATAACGGCTGAAAGATGTCAAGCTGATTCGCGCTCTGATGGTTC  
CAGCAAGTGAAGAGGGAGTTGAGACGCTGTTCTCTCTGCGTCACTACAAGGAAAGTACAGCT  
TCTTACTCCAACAATTGGTATGAGTTCGCTGTTTCTTGGTCTGCCGCTGATGGGTGGGCTG  
AACACGCTCACGGTATGATTACTGCCGTCTATGATGCCCCGAACACGGCTCATTAAACCGTAT  
TCCCTTCAACCCACGATGGATATTGCAGTGGACTTGGAGAACTTTGCGGGAACCCGCACAGC  
TGAGAACTTGTATGACATCGTCGATGCTGTGGGTTTGGTGTACGAAGAACCATTCCGGAACTT  
GACTGGAGACCTCGTGTCCAACGAGGGCACAGCAAAGGGGGTCGTCCTGTGCCTGATACCA

AGTCCCTGATGCCTTTTGTAGTTTGTAGTATCCTTATCTCGTCCACCCTGCCACTATGGACGGGTTT  
GTCCAGATGGTGTTCCTCCCGCGTTGCTACATGCCAGACCTCCATCGCGTCTCCGTATCTACCAG  
TCTTCTTCGCCGACACTTTTGTACGAGGCGATATTGCTCAAGCTGCTGGCCATCGGTTTGACTG  
CATCGCAACTGCGGGATACACCGGCTTCCGAGAGGTCACGACCAATGTTCTTGTCCGCGACGA  
GGGCACCGGCGACGCGGTGGTCAGCTTTAAGGACGTCAAGTGCAGCGGAGTTGACTCTGGAG  
AGAATGCCAATGACGGTCTATCGGGTCGAGAAGCTATCAAGAAGCTGTGCTTCCACTCCACGT  
GGCACCCGGACCCAGAGCTCCTATCCCAGGACAAGGGTGACGAGTTAATGCGTTCCTTTATTC  
CTGTCCCTGAAGACCCTCAGCGAGTGGCTAACCTCGAGTCGATCGCCTACTACTACTACTACC  
GGGTTCTGCAGACTGTTACTGAAGACCAGGTTCCCAGCATGAAGCCTCACCACCAGAAGTTCT  
TCCGATTCATGCAGTACCAGAGTGACCTCGTTTTGGCTCACAAGAGCCCTCACCAGACACCCG  
AGTGGGAGCAACTTGATGACCCAGTCATCAGCCAGAAGATGGAGAATCTGGCTGTCCGTCTG  
GAACCCTCTGGTACCAGCTCAGCTCATCTGCCGAGTGGGCCGAAAGCTCGACAAGATCCTC  
ACCGGCGTCGTCGACCCGCTTGCCTGATGCTGGAAGACGAGCTTCTGTACAAGTACTACGAG  
TCTGTTCATGGGCTACGACATCATTACCCTACGCCGAGATCCTTGCCAACAAGAACCCTAATA  
TGCAGGTTCTGGAAATTGGTGGCGGTACTGGTGGTGTACGGCCCCAATCTTGTACGTTTTCG  
GCGGAAATAACGGGAAGTACCCCAAGTTTACCTCGTACACTTTACCCGATATCTTTCGGGCTT  
CTTCGAGGAAGCCGAGACCAAGTTCAAGGACTGGGAGGGCCTTGTTGAGTATAGACGACTCA  
ACATTGAAGAAGACCCTGTTGATCAGGGTTTCGAGGCTGGAAAATATGATCTTGTTCGTTGCAG  
CTTCGGTGTACACGCTACGGCCAACATCACTCGGACTCTGGAGAACACGCGAAAGCTGCTTA  
AGCCGGGTGGTTCGTCATCTTGGTTGAGATCTCCAATATACTCAACCAGGCCTTCCTCTTGT  
TGGCTGCCTGCCCGGCTGGTGGATGTCTGAGGAGAGCTACCGCCCTTGGGGTCCACTATGGA  
TCAGGATATGTGGGCAGAGCACCTCAAGCGTGTGGGTTGAGTGACCTGACTCTCGCTGCACC  
AGATAGCGAGGACCCCAAGGACGAGCTGGGCCGGGTCTTCTCTTGTGTTGCTGTTGAGCAGC  
CTGCCCCGCCATCCGTCGACCCATCTATTCCTCGGTAGTACTGATCGTCGATGACGGCGCACC  
TAGTGATTTGGAGCAGTGTATTGACGAGAAATTTTGAAGCTGGGTGTTCCAGTTCGTAGGAC  
TCGACTTGCTGAAGCGGCAGACACACCCTAGAGAACACTTGTGCGTGTCTCTGGCTGAGG  
TCAACCGCTCGGTCATCAAGGATATGACATTGGCCGAGTTTGAAGGCATCAAGACTATCTTCA  
AGTCTAGCCGGGCTTTGCTCTGGGTGACCGAAGGAGCATTCAACAACGCAAGCCGTCCAGAG  
TCGGCCCTCTTCCACGGTCTTGCTCGCTCACTCCGGGCTGAGAACGAGACCTTCCCGTTGACC  
ACGGCGGACTTTGCGTCCATCAATCGTAAGAACCCTTCAGAACTGCACAACAATTGCTTGA  
CTGTTGAAGCAAGTCTGCGGAACCCCGGAACCTCAGGAGCCCGAGTATCACTATGAAGATGG  
CTCTTGGAAAGTCTGCCGCTGCCTCGAGTCTGTTGATGCCAGCGCTCAGATCCATGGCTGCCT  
GCACCATGAGTCAGCTGTCAGCGATAAGACAGAGTTGCAGCCCTTCTACCAGCCCGGTAGGCC  
CTTGAAGTTGAGCATCAAGACGCCTGGTCTTCTGGATACGCTGCGCTTCGAAGACGATCCTCT  
ACCAGCCGAACCTCTTGGCACTGACGAGGTTGAAGTTGAAGTCAAGGCATCCGGCGTCAACT  
TCCGCGATATCATGATCTGCACGGGACAGATGTCTGACCCTTCGCTTGGACTTGAGTGTGCTGG  
CATTGTCCACCGCGTCGGAGACAATGTCTCTAATGTCAAGGTCGGTCAGCGTGTGGTAGCGTG  
GACTCGATATAACTACTCCAACTATGCTCGTACTCCCGCTTGCCTTGTCCAACCAATCCCTGAC  
GACATGAGCTACGCCACCGCGGCCTCCTTGCCTATCGTATACAACACCGTCATCTATGGGTTAC  
AGCACATGGCTCGTCTCCGCAAGGGCGAGTCGATCCTCATCCACGCAGCTGCTGGAGGTGTTG  
GTCAAGCGGCTATAACTCTAGCCCAACGTCTTGGGGCGGATATCTTTGTAACGGTTGGAACCTCA  
AGACAAGCGAGACCTCATGAAGAGCGAGTTTGGAAATCCCTGACGAGCGTATCTTTTCTAGTCG

TGGCATTAGCTTTGTGCAAGACATCAAGAAGGCAACCAACGGCCGCGGCGTTGATGTCGTGCT  
CAACAGCTTGGCGGGAGAGATGCTGAGTGCTACATGGGACTGCATTGCTACATTTGGCCGCTT  
CATCGAGATAGGCAAGAAGGATATGATAGACAACCGTCGTCTCGATATGGCGCCGTTTCTGCGT  
AATGTCATGTTTGCCTCTATCGATCTCATCACCGTCTATGAGCAGAACATCTCGTTGGCAGGTG  
AGCTTCTCCATGAGACGATGGACCTCATCCGAACCAAGGCCATCAAACCTATTCCCCGCATCA  
AGATCTTCTCATTCTCCCAATTTGAGGAGGCCTTTCGTTTCATGCAGCAAGGCAAGCATGTCGG  
TAAGATTGTTATGGTGCCTGAAGAGAACGACATGGTCCCAGTAAGTTTCACTTTGCAATGCCAT  
TCCTGCTTGTCTAATAATTTCTACTAGGCTATCCCAGCATCATCGGGTCCCTTCACCTTCCAGGA  
GGACGCGTCATATCTCATTACTGGATTTGGCGGTCTCGGTTCGAGTATGGCACGCTGGATGGCT  
TCGCGAGGTGCCAAGAACCTCATCTTTGCTTCGCGTTCTGGAGACAGCCGCCCTGAAGTGCGC  
GAGCTCATTGATGAACTTGCTGAGGTTGGCACGCGAGTTAAGGCTCTGCCAGTTGACATCACC  
AATGGACCAGCACTAGATGCCGCCATAAGAGGCATTGCCGATAGTTTCCACCTCTCCGTGGT  
GTTGTTCAAGCTGCCATGGTTCTGGACGATGCCATCTTCGACAACATGTCTCTCAAGTCGTTCA  
ACAACGGCATTAGGCCCAAGGTCCAAGGAACTTGAATCTGCACCAGTCTACGTTGAACCAA  
CCGCTCGACTTCTTCGTATCATGGCGTCTTCAGTCGGTGTCTTGGTAACTCCGGTCAGGCCA  
ACTACTCAGCCGGTAAACGCGTACGAGGATGCTCTCGCACAGTACCGCCGCTCACAAGGACTCC  
CTGCCATCTCGGTTGATCTGGGTATGATCTTGTCTGTGGGAGCCGTGGCTCAGGATTCTACGGG  
AATGATCCGCAACAATCTAGAGAGCAAAGGATTCGTGGGTATTGAGGAGGATGAGTTCCTTGC  
CATCCTCGAGACTTCCATTCGAGAGTCATCCTCTTCATCAGCTGCCAGTCAGATGATTACTGGC  
ATCCAGACACAATCAACCGTTCCAGGTGACGACGGCGTTCCCGTTGACGAACCTTCTGAAAA  
TCTAGCCCAGTCTTCTCTCACCTCCCGAAATTGGGCGCCCGCTCTTCCGGTCAGTCCAACAATG  
CGGGCGAGCAGTCCATTCAGTCTCTCCTCAAGGGAGCCCTCTTACTAACTGATGCTGTGACGG  
TCATCATCGACGCAATGACAATCAAGCTCAGCCGCAGTCTGATGATGGACGTCGCAGAGCTGG  
ACCCGACCCGCCAACCAGTGCATTTGGAATAGACAGCTTGGTGGCTGTGAGCTCCGAAACT  
GGTCCAGAAACACATGAAGGCTGATATTGCCGATTTGAGATTTTGCAGACCAATAGTCTGCA  
GACGCTTGCCTTTCGAGTTGCAGAGAAGAGTACTTTGGTGGAAAGGCTCCCTGGCAGATGGAC  
AGTGA

**ProG gDNA nucleotide sequence**

ATGAGGTTTCTTTGCTTGCATGGTGCCGGCACTAACTCAGATGTACGTCGTATTCTGAATTCTCC  
CCATGTCCCTCACTGACTGGTCTATTTGTAATCAGTCCCTTGACATTCAGACTGGTAATTTAAA  
TACTCTGTATTAACGGGACATAATGTAACACAAGATCCAGGACCAATCCGTGATTCGCTCGACA  
GCAACGCCACGTTTAAGTTCTATGATGGGTTTTGGGATGTAGAACCAGTGGAAGGTAACCTCGC  
CTTCTCAACTCCATAATGCCCCGTATGCTTAACTTGGTGGATCAGAGATCAAGAACATATTTG  
CCGGTCCCTTCTACACTTGGTACTCTCCTGGCCTCGGCGGTTCGACTCTCACAGAAGCCAAAG  
CCGAATTGCTCGATCTCATAGCGACTGAGGGACCATTCGACGCCTGCATGGGCTTCTCACAAG  
GCGCAGCCCTCCTTGCAGCTGTCATCATCGATCATCAGGTACAGAACCATTCCGGGCCAACCT  
ATTCAAATTTGCCGCGTTCATCTGTGGTGGGAGTCCCTGCTTGTACCAAGGCGCTTGAGCA  
GGACCATCTTACTACCAGCCAACTGTAGATAGAATGGCCCCATTGACGGAGCCTTGGCTGGG  
TCCATATGTACCGGGCCACGAGCCACATCCTGACGAACAGTGGAACATGCTCGTGGCCACAG  
AGTAAGGGAGGCTGGCTTAACCATTAGGATTCCCACAGCGCACATCTATGGGGCTAAGGATCA  
CACCGTCAAGGAAAGCCTGAACTTGGAGGGACATGTGTGATCCCAGGAGGAGATTGAGTTG



ATCATGGAGGAAGACACGAGGTACCCAGAGCCACTAGAGTTGTTTCAGCAGATGGCAATGACG  
TTGAGGAGGGGAATTGATAAGGCCATGACCGCTGTATAG

**ProI gDNA nucleotide sequence**

ATGACAGACAAGAAACCCATTCGTGTTGCCATCATTGGCGCCGGCCCAGGTGGTCTCGTACTC  
GCGCAGACACTTCGACAAGACCCTCGCTTTAGTGTGACTGTCTACGAGCGCGGCGTGCGTGAT  
GGTAGCGGCGTCAGTTCGTTGGTTGGTTTCCGTATCCTTCTTCCACCCTCTATCCTCGATAATTT  
GCGCAGCCAGCTTCCTGCATCTGTAGCGACTCTTATCGATGACGCCATTGGCGTTCCACAAGCT  
CAGGGAAATCGCGTGGCGTTTATGGATGAGCAATGCGGGATCATCTGTGCCTGGATGTGCAG  
CAGTCCAGGGACATGTGCTCTGTATCAAGATGGAAGTTGAGGGAGGCTCTGCTGCACGACGC  
AGAAGAGATTGTCCAATTCGGCAAACAGTTTTTCATCTTATGAGCAACTAGGTGGAGAGTCGGG  
CGACGTAAAGGTGCGCTTTGCAGATGGGGATGAGATAGAATGCGATGTCCTAGTCGGAGCCGA  
CGGTGCCGTTCAAAGTGCAGAACTGTTACTACCAAACAGCCAAAGGAGTGCCAGTGGCC  
TTACTGTTGTCTACTTCAAAGCACCATTACTCCCAGACTGAAGCCATGATTCCCTTGGAAAGTC  
TGGATGTGTGGTAGGTTTAACTATTTCGCTTGTAGCTGAATGCGACTGCTAACATCCAGCTAGG  
CGATTACACCCAGGCGTTCCATGGTGGTGGCTTACTACAAAGATCGCCGGAGACCATATGGAC  
CCTATGACTTGAAAAGATCGACCCTGCCGACTCGTTTCTCATGTTTGGGCTGGGCTGCTACAC  
CAACGAGTTCGTGAACCAGAGCAAGCATCCCGACGAGATGACTCCCGAGGAGCTGAAGGATG  
AGTGTGGCCAGAGCCAAGGATTGGAGTCCGCTTCTTCGGGCTCTTATTGCGCTGAGTGTGC  
CCAGCTCAGTGTGTGTCGCATGTCAAGACACAAGATCCGATCAAGCCATGGGAGTCGGGA  
AGGGTCACTCTTTTGGGGGACGCCGCTCATAGGTGAGTCTGTCACTCTTAGATTGCCGGTGAG  
AATGAATCGGGTGTTAACCAAGTCGACAGTATGACCCCATACCTAGGCAAGGGTGCCAGCAGT  
GCCATGATAGACGCCATGTCCCTTGCCAAAGCTCTCAAATCCGAGCCAAAGCAAGGCCAAGGT  
GACTTTCTCAAAGCGCAGCTATCCATCTATGAGGAAGCAATGCTGAAGCATGGCTTTGAAGCA  
GCTAGACAGAGCATGACTGCGCAAAGTTCACTTTCAATGCTGGAGACACCCCGTGGAAGTG  
TTGGTGGCGGAACCTGGCGCTCAAGGCGTGGGACTGGTGGATGTCACATCCGCCAGCGATGG  
AGGAGAATTTCCAGGTATGTGTCTTTGGCTCAAGTATATCGCACGAATTACTGACTGGTGGCT  
AGTGAGCTATAGTGAAGATGAAGAAGGACGTATGA

**ProJ gDNA nucleotide sequence**

ATGCCTAGTTCAGAGTTGGCGCACCCGTCCCGCAAGATCCTGCTTGTGGTGACGACGGGCGGA  
TTCACCCATGCCAGTACGTTAGACTAGCCCTCTCCATATCACGCCACTCACTTCCAAGTTCTA  
ACCCTCGCCCAGGTCCCGTATTCGAGATTGGCAAATTTCTGGCCGTAAGAGGCCACACCATTG  
AGTTTGCTACGCTCGAGGGCCAGGAAGCCTGGACTAAGGGCTATGAGTTCATCACCAAGGTCC  
ACACCCTGGGCCCAGGCGGCGGACTCACGACCAGATGAATGCCACTACCTGCGCATGCGAACG  
TGGGACATCTCAAAGGGCATCTCGGGGACTATGCCAGCAAGTATCTATGGGACTCGTTCTGG  
CCACAGACATATCGGGGACTCAAGGCCATCATGGACGACCCCAAGACAAGGCCAAGCATGAT  
GATTGCCGACTTCTTTGTTGATGCCGTC AAGGATATTCACGTCGAGTATAATCTGCCAATCACTC  
AAGTCTGGCCCCAGATGCCCTTCTTGATGATGCCATGCTCGTACATTCCTGGCCAACCGGGCTT  
TCAGCTTGAGGGAACACTTACCTCTGAGCATGCTAGCCTCTGGCATCGGATCAAGAACGAACT  
CGTCATCTTCTTTGACCTCCCCGTTATCGTGAAATGGATGAAGTGGACCAAGAAGATGCGCCTC  
GAAAATGGTGTCAAATATCCTCCTCACAAAGATCCAGAAGCCTGACTACCTTATTTTTGTAACT

CCTTCCTTGGCCTGGAGATTCCGCGTGATCTACCTCCTACCTGTGCCCCGGTTGGACCCTTGAT  
CAGTGACACTTATCCACCACTCAACGAGGAGTGCAAGCAGTTCTTGACCAAGCACACCAAGG  
TCATCTATATCGCCCTGGGCACACACATTATCCTCACCAATGCCGACGCAGCCAAGATCATCAA  
CGGTCTGCTGCTTCTTCTTGAAGGGAGCTTATTGGACGGCGTCATTTGGTCTATTCCCAAGAGT  
GGCCGTCAAGATCTCGATGTAAACACGACCTATAAGACTGGTAACAAAACGCTCCGCCTGGGG  
GATATTCTGGATGGAAAGAACCCTGACTGGCTGTGTTCCACCTTTGTCCCCAGCGAGCTATCC  
TCGACCACCCCTCGACAAAACCTACTACACACATGGTGGTGGTTCTAGCGCCAACGAGGGTC  
TCTTCCACGGGGTACCCATGCTGTCCATGGGTGTCTTCATGGACCAAATCTCCAACACAGCTCG  
ACTCGTCGATGGAGGCGTGGCTGAGCCGTTAAACAAGTTCCGCTTTACGTCCCAAGAGATCTA  
CATAAAGGCAAAGAAGATTCTCCTTGATGGAGATGGAAGCTATAAGCGCAATAGCCTGCGGTT  
GATGCGCATCGCTCATGTGGCTGCCCCGACGGAAAAACATGCCGCGGACCTGGTTCGAGGAGC  
TGATTTACGACACTGAGCTGAGGTTCAAGGATGGAAAGGAACTCAGGCCCATGCATCTGCAG  
ACGGCGGATATGCGTATGCCAGTGTGGAAAGCCAAGAAGCTGGGATATTTGGGCTGTCAGTCTT  
CTGGGCATTGGTGTCTTTGGAGGACTGGGGATTGGCGGAAGAATGTTGTGGCTGCACCGG  
GTTTGGCTGACTGGATCAGTGAAGGGATTCTGTGGGAAGCCAAGAGTGGTTGAGGAACCTGAT  
CAAGTAG

**ProK gDNA nucleotide sequence**

ATGGCTAGGGAGTATTCCGGTACTTGCATCACAGCTGTTGATACGCCGTATTTGCAAGCGTCTA  
AAAGTCTGAGCGAAGTGGCATTTCGAGTTTCGTGAAAGGAGTCGCTGGGCTAACGCCAGAGAA  
ACTGGCCAAGGGCGATGAGTGGATTTCAGTCAATTCAAGCTATCAACGGGCTCATGGACTTGGC  
CCCCGCATTTGACACTGATACTTTGTATGTAGATGATTGGACCAAAGTTTCTATGGAGGAGATG  
AATTCGGACAGGAGCAGCATATGTTCTGCCAGCCGTTAGAAGTGGAGGCTCTGCCAGTCCGA  
AACTGGTGCATGATTTATTCGGCAAAGGCTGCTAATGCAGGAGACGCGAATAGCCTGGGATAC  
CAGGTACAAGTCGTGGTGCTAAAGGGACGCGCAGCTGAGCTCATTAATGGGATAGTCACGGAT  
CTTCAGGAGGGATTTGACGAGTACTTTTGGTAG

**ProL gDNA nucleotide sequence**

ATGTATCGACTCAGTTTGGCATCTTTACTATCACTGGCCTTGCCCCTTGTAGCAGGATCTCAATT  
ATCATCAGGTTAGATCGTCCTTCGCACCTCGGCCGAGGGTTACTGACGTGGTACAGCAATCGA  
CCCCTCGCAATGGCTCAACGCTCGTGGTAAAGCAGACTCACTGACCTCCAAGATGACACTGG  
AGGAAAAGTCCTCGATGGTGACAGGCACCTTTGACGGCACATGCATCGAGCACATCGCACCC  
CTCAAACGTCTTGGCTTCGGCGGTCTTTGCATCCAAGACGGACCAATTGGTCTTCGCCTTGGC  
GATCTAGTCAGTGTCTTTCCATCGGGCGTTACTACCGCTGCAACGTGGGACAGGCAGCTGATG  
GCGCTGAGGGGAGAGGCAATGGCGGAAGAATTCAAAGCAAAGGGTGCCCACGTGATTCTTGG  
GTCAGATCTGCCACTCCTCCTCGTGTGGAATCACTGACGATAGATTAGACCCGTTGCAGGAG  
CCCTGGGAAGAAGTCCATACGGCGGTGCAACTGGGAGGGCTTCTCGCCAGATCCATACCTAA  
CCGGCATCGCCATGGGTGAGACAATTTCGAGCAATCCAAGACACCGGTGTCCAGGCTACAGCC  
AAACATCTCGTCGGCAACGAGCAAGAAACGCAGCGCAAGCCCACTCATCAACGGAAAGAT  
GGTGGACGCAGTATCCTCCAACATTGACGATCGCACCATGCACGAGCTGTACATGTGGCCCTT  
TGCAGACGCCGTTACGCTGGTGTATCATCGGTCATGTGTGGCTACAACCGAGTCAACGGCAC  
ATATAGCTGCGAGAACAAGCATCTGATCAATAACCTCTTGAAGAAAGAGCTTGGTTTTGAGGG

CTATGTCATGTCGGACTTTCTGGCTACGCCGCCTGGACTTGGTCCCGTCAAGGCAGGGCTTGAT  
ATGAACCAGCCCGGACCTGTAAATCCACTTCCCTGTTGACACGTAAGGCGACAATCTC  
GTTGAGTGTGTCAAGAACAAGACTCTCCGAGTCGGATCTCAATGGAATGGTGCGCCGCATC  
TTGACGCCTTACTTCTATCTTGGTCAGGACAAAGACTACCCGTCTAAGGATCCATCTTCTCAGC  
CTCTCGTCTACAACGGCTTCGGGTATCCTTATCCAGGCCCTTCTCCAGTTGGCCGCGATGTCCG  
CGGCAACCACTCAGCGCTCATCCGTGAGATCGCCGCTGCCGGAACAGTCTTGCTCAAGAATCA  
AGGTTCCATTCTTCTTAAACAAGTCCCTCACCAACATCGGTCTCTTTGGTAACGATGCTGCT  
GATCCCTCCGTCCGTACCCTCTTACAGCGACCACGATGGCATCGACATCGGTACTCTTATCTCCG  
GTGGCGGTTACAGGAAGCGGCCGACCAAGCTACGTTATCAGTCCCTTGGACACGTTCAAGTCTT  
ACGCGAAAGCCAACGGCAAGCGGCTCCAGTACGTCACCAACAATACTGCTATTCTCAGCATT  
TGCCTGGTCTGTACCCTTGGCCAGCGGTCTGTATAGTCTTCCCTCAAATCTTTCGCCACCGAGGG  
TTTTGATCGCAAGACTCTTGTGGCAGATGACAACTCAGTTCAAGTCGTAATAGTATTGCATCG  
CGCTGCCCTCGCCGACCGTCGTAGTCACTCACTCTGGAGGGCCAGACGTGATGCCGTGGGC  
GACGAACCCTAATGTTAGCGCTATTGTCGCTGCGCATTACCCAGGCCAGGAATCAGGCAATTCT  
ATCCTGGACGTCTTGATCGGAAAGGTCAATCCCTCTGGAAAGCTCCCATATACAATTGCCAAG  
AAAGAGGAGGACTACAACGGAAAGATCACCAACATCACTGGCTCCGCAGCTGAAGACTCTTC  
GAATTGGCAAAGTGAATTTAGTGAGGGCCTGTTTATTGACTACCGACACTTCGAAAACAAGGG  
CCTAGAGCCTCTCTATGAGTTTGGCTACGGTCTCAGCTACACCACCTTTAAACTATCCTCCACC  
CTCGTCTCTCCTCAGCAAACAAGATCTCCGCCC GCGCATCCCCCTCCAACGCTACACTCACC  
CTAGGCGGTAACCCTCACCTCTGGGAAACAGTCATCAAGTGCCACGTCGAGGTATCCAACACT  
GGTCGGGTTGCAGGCGCCACAGTCATCCAGCTGTATGCGTCTCTGCCAAGAACAATATACCA  
GCCAACAGCCCAGTACGGATGCTTCGTGGGTTGAGAAAGGTCTATCTTGACCCTGGGGAGGCC  
AAGAGAGTGTCAATCGCCCTAAGGCGTCGGGATCTGAGTTATTGGGATGTTACTATCCAGGACT  
GGATGGTACCAAAGGGTGGCATAAAGCTCAGTGTTGGGTTTAGCTCGAAGGATCTGAGGTCTT  
CGACAACCGTTCAACTGGTAAAATAA

## 5. Supplementary references

1. T. R. Hoye, C. S. Jeffrey and F. Shao, Mosher ester analysis for the determination of absolute configuration of stereogenic (chiral) carbinol carbons, *Nature Protoc.*, 2007, **2**, 2451-2458.
2. Y.-M. Chiang, M. Ahuja, C. E. Oakley, R. Entwistle, A. Asokan, C. Zutz, C. C. C. Wang and B. R. Oakley, Development of genetic dereplication strains in *Aspergillus nidulans* results in the discovery of aspercryptin, *Angew. Chem. Int. Ed.*, 2016, **55**, 1662-1665.
3. W. Xu, X. Cai, M. E. Jung and Y. Tang, Analysis of intact and dissected fungal polyketide synthase-nonribosomal peptide synthetase *in vitro* and in *Saccharomyces cerevisiae*, *J. Am. Chem. Soc.*, 2010, **132**, 13604-13607.
4. J. Fang, Y. Zhang, L. Huang, X. Jia, Q. Zhang, X. Zhang, G. Tang and W. Liu, Cloning and characterization of the tetrocarcin A gene cluster from micromonospora chalcea NRRL 11289 reveals a highly conserved strategy for tetronate biosynthesis in spirotetronate antibiotics, *J. Bacteriol.*, 2008, **190**, 6014-6025.
5. H. Zeng, G. Yin, Q. Wei, D. Li, Y. Wang, Y. Hu, C. Hu and Y. Zou, Unprecedented [5.5.5.6]dioxafenestrane ring construction in fungal insecticidal sesquiterpene biosynthesis, *Angew. Chem. Int. Edit.*, 2019, **58**, 6569-6573.
